# Supplementary material
Source: bioRxiv or medRxiv preprint supplement (https://www.biorxiv.org/highwire/filestream/32955/field_highwire_adjunct_files/0/113514-1.pdf)
Supplement: Supplementary file [file 113514-1.pdf]

**Figure S1:** Density of the SNPs per base-pairs within the pharmacologically important genes. Genes having 0 SNPs in our dataset are given in black. A represents the density of SNPs in ADME genes while B, C, D, E, F, G and H represents the density of SNPs in other pathway genes.

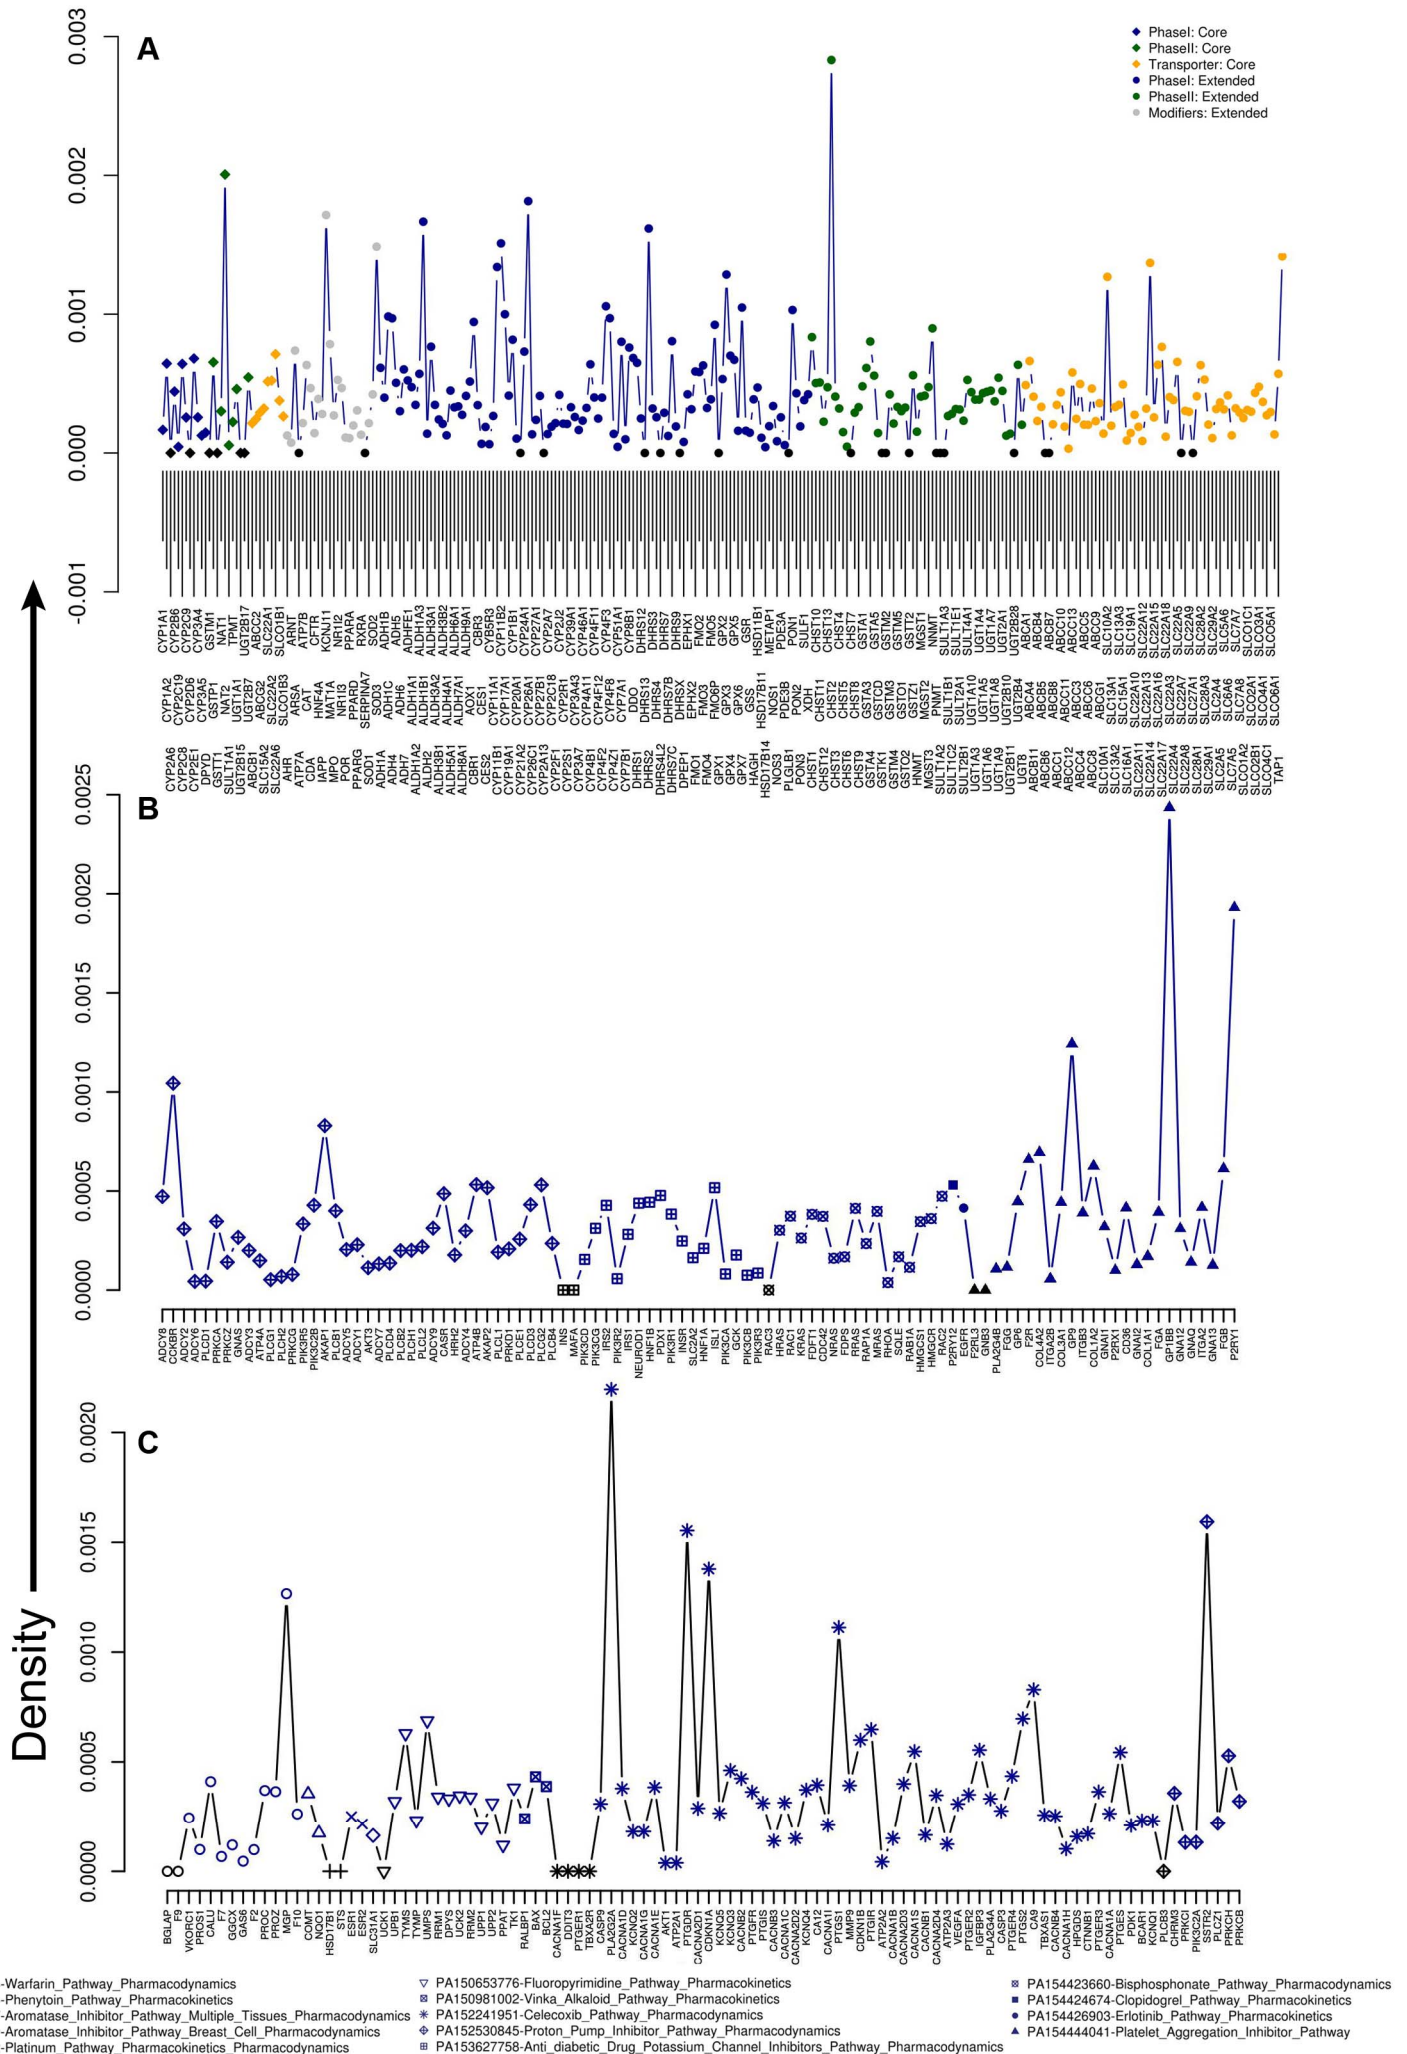

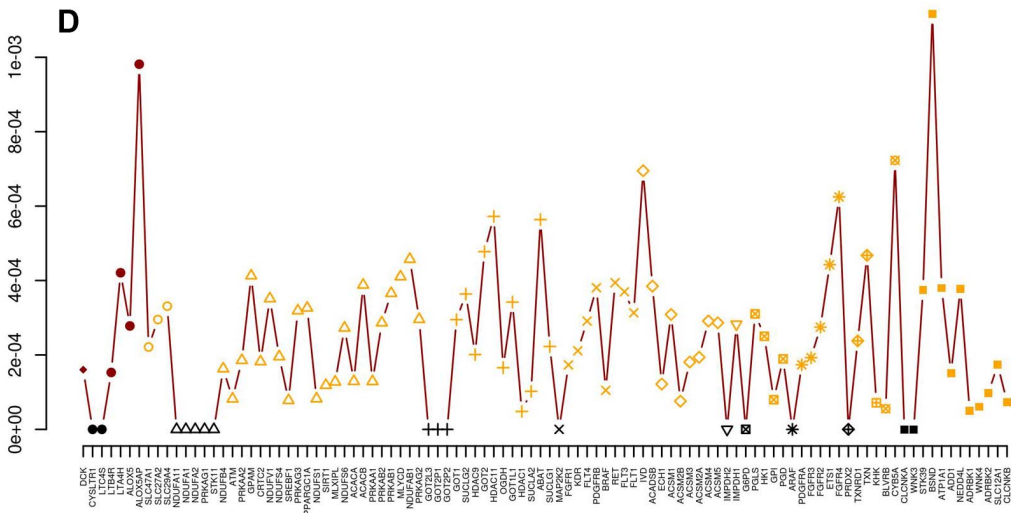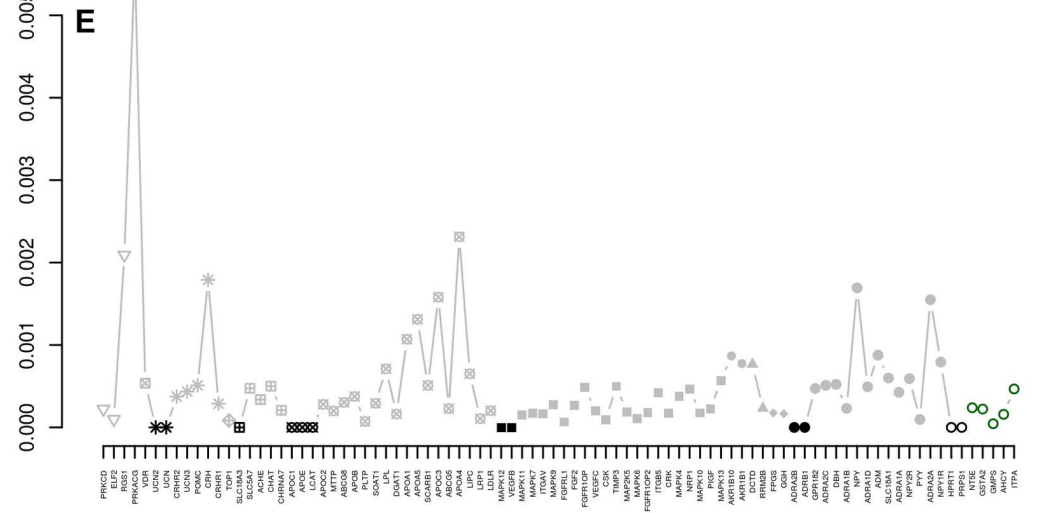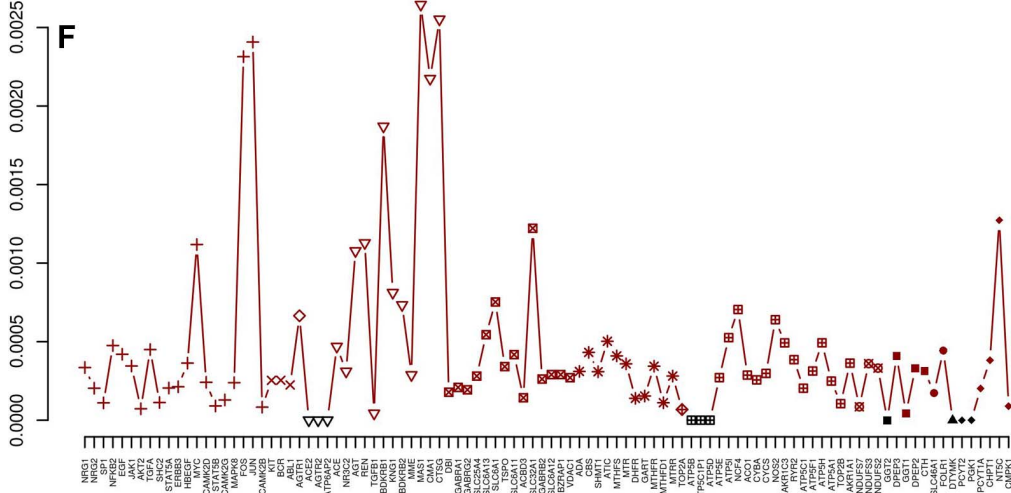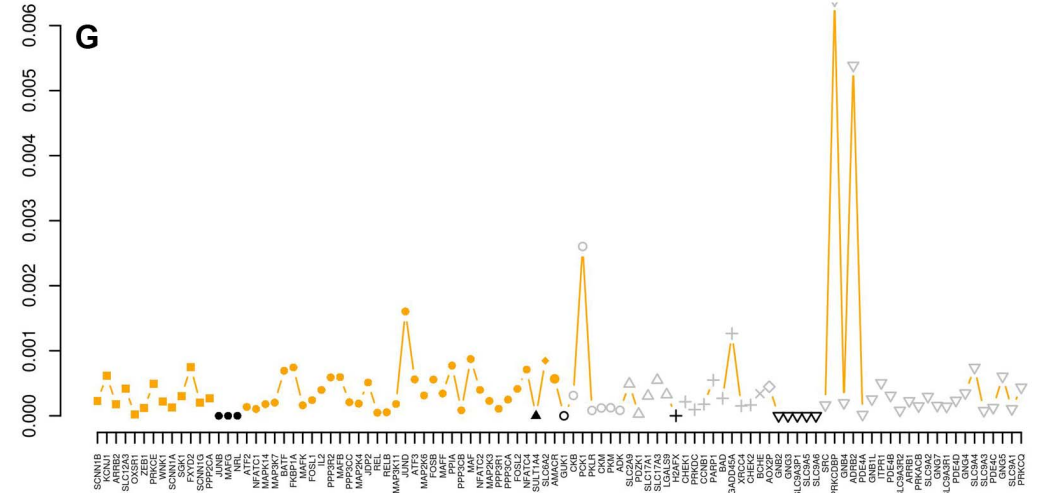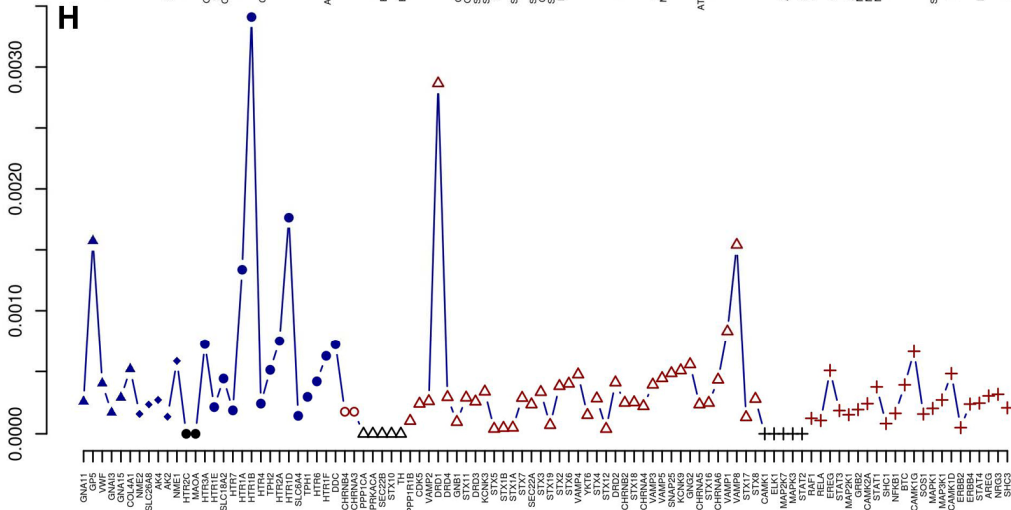

- PA155028030-Tenofovir\_Adefovir\_Pathway\_Pharmacokinetics
- PA161749006-Selective\_Serotonin\_Reuptake\_Inhibitor\_Pathway\_Pharmacodynamics
- PA162355620-Nicotine\_Pathway\_Chromaffin\_Cell\_Pharmacodynamics
- △ PA162355621-Nicotine\_Pathway\_Dopaminergic\_Neuron\_Pharmacodynamics
- + PA162355627-EGFR\_Inhibitor\_Pathway\_Pharmacodynamics
- × PA164713427-Imatinib\_Pathway\_Pharmacokinetics\_Pharmacodynamics
- ◇ PA164713428-Losartan\_Pathway\_Pharmacokinetics
- ▽ PA165110622-Agents Acting on the Renin\_Angiotensin\_System\_Pathway\_Pharmacodynamics
- PA165111376-Benzodiazepine\_Pathway\_Pharmacodynamics
- ★ PA165291575-Antimetabolite\_Pathway\_Folate\_Cycle\_Pharmacodynamics
- ◆ PA165292163-Doxorubicin\_Pathway\_Cancer\_Cell\_Pharmacodynamics
- ▨ PA165292164-Doxorubicin\_Pathway\_Cardiomyocyte\_Cell\_Pharmacodynamics
- ▩ PA165292177-Doxorubicin\_Pathway\_Pharmacokinetics
- PA165374494-Busulfan\_Pathway\_Pharmacodynamics
- ▲ PA165816349-Methotrexate\_Pathway\_Pharmacokinetics
- ▲ PA165859361-Zidovudine\_Pathway\_Pharmacokinetics\_Pharmacodynamics
- ▲ PA165860384-Lamivudine\_Pathway\_Pharmacokinetics\_Pharmacodynamics
- PA165947317-Leukotriene\_modifiers\_pathway\_Pharmacodynamics
- PA165948259-Metformin\_Pathway\_Pharmacokinetics
- △ PA165948566-Metformin\_Pathway\_Pharmacodynamic
- + PA165959313-Valproic\_Acid\_Pathway\_Pharmacodynamics
- × PA165959584-Sorafenib\_Pharmacodynamics
- ◇ PA165964265-Valproic\_Acid\_Pathway\_Pharmacokinetics
- ▽ PA165964832-Mycophenolic\_acid\_Pathway\_Pharmacokinetics\_Pharmacodynamics
- PA165971634-Pentose\_Phosphate\_Pathway\_Erythrocyte
- ★ PA165980050-Vemurafenib\_Pathway\_Pharmacodynamics
- ◇ PA165980399-Oxidative\_Stress\_Regulatory\_Pathway\_Erythrocyte
- PA165980774-Uric\_Acid\_Lowering\_Drugs\_Pathway\_Pharmacodynamics
- △ PA165980834-Methylene\_Blue\_Pathway\_Pharmacodynamics
- PA165984799-Diuretics\_Pathway\_Pharmacodynamics
- ▲ PA165985892-Tacrolimus\_Cyclosporine\_Pathway\_Pharmacodynamics
- ▲ PA165986279-Acetaminophen\_Pathway\_Pharmacokinetics
- ▽ PA166014758-Venlafaxine\_Pathway\_Pharmacokinetics
- ▲ PA166014759-Venlafaxine\_Pathway\_Pharmacodynamics
- ▲ PA166104634-Abacavir\_Pathway\_Pharmacokinetics\_Pharmacodynamics
- ▲ PA166114721-Uricosurics\_Pathway\_Pharmacodynamics
- + PA166115250-Gemtuzumab\_ozogamicin\_Pathway\_Pharmacokinetics\_Pharmacodynam
- × PA2001-irinotecan\_Pathway\_Pharmacokinetics
- ◇ PA2011-Nicotine\_Pathway\_Pharmacokinetics
- ▽ PA2024-Beta\_agonist\_Beta\_blocker\_Pathway\_Pharmacodynamics
- ▲ PA2025-Etoposide\_Pathway\_Pharmacokinetics\_Pharmacodynamics
- ★ PA2026-Glucocorticoid\_Pathway\_HPA\_Axis\_Pharmacodynamics
- ◆ PA2029-Irinotecan\_Pathway\_Pharmacodynamics
- ◆ PA2030-Sympathetic\_Nerve\_Pathway\_Pre\_and\_Post\_Ganglionic\_Junction
- ◆ PA2031-Statins\_Pathway\_Pharmacodynamics
- ◆ PA2032-VEGF\_Signaling\_Pathway
- ◆ PA2035-Cyclophosphamide\_Pathway\_Pharmacodynamics
- ▲ PA2036-Gemcitabine\_Pathway
- PA2039-Methotrexate\_Pathway\_Cancer\_Cell\_Pharmacodynamics
- PA2042-Sympathetic\_Nerve\_Pathway\_Neuroeffector\_Junction
- Thiopurine-Pathway-Pharmacokinetics-Pharmacodynamics

**Figure S2.** Number of SNPs per 200,000 base-pairs along all chromosomes. The number of SNPs are equal to number of chances to find extreme std-z score.

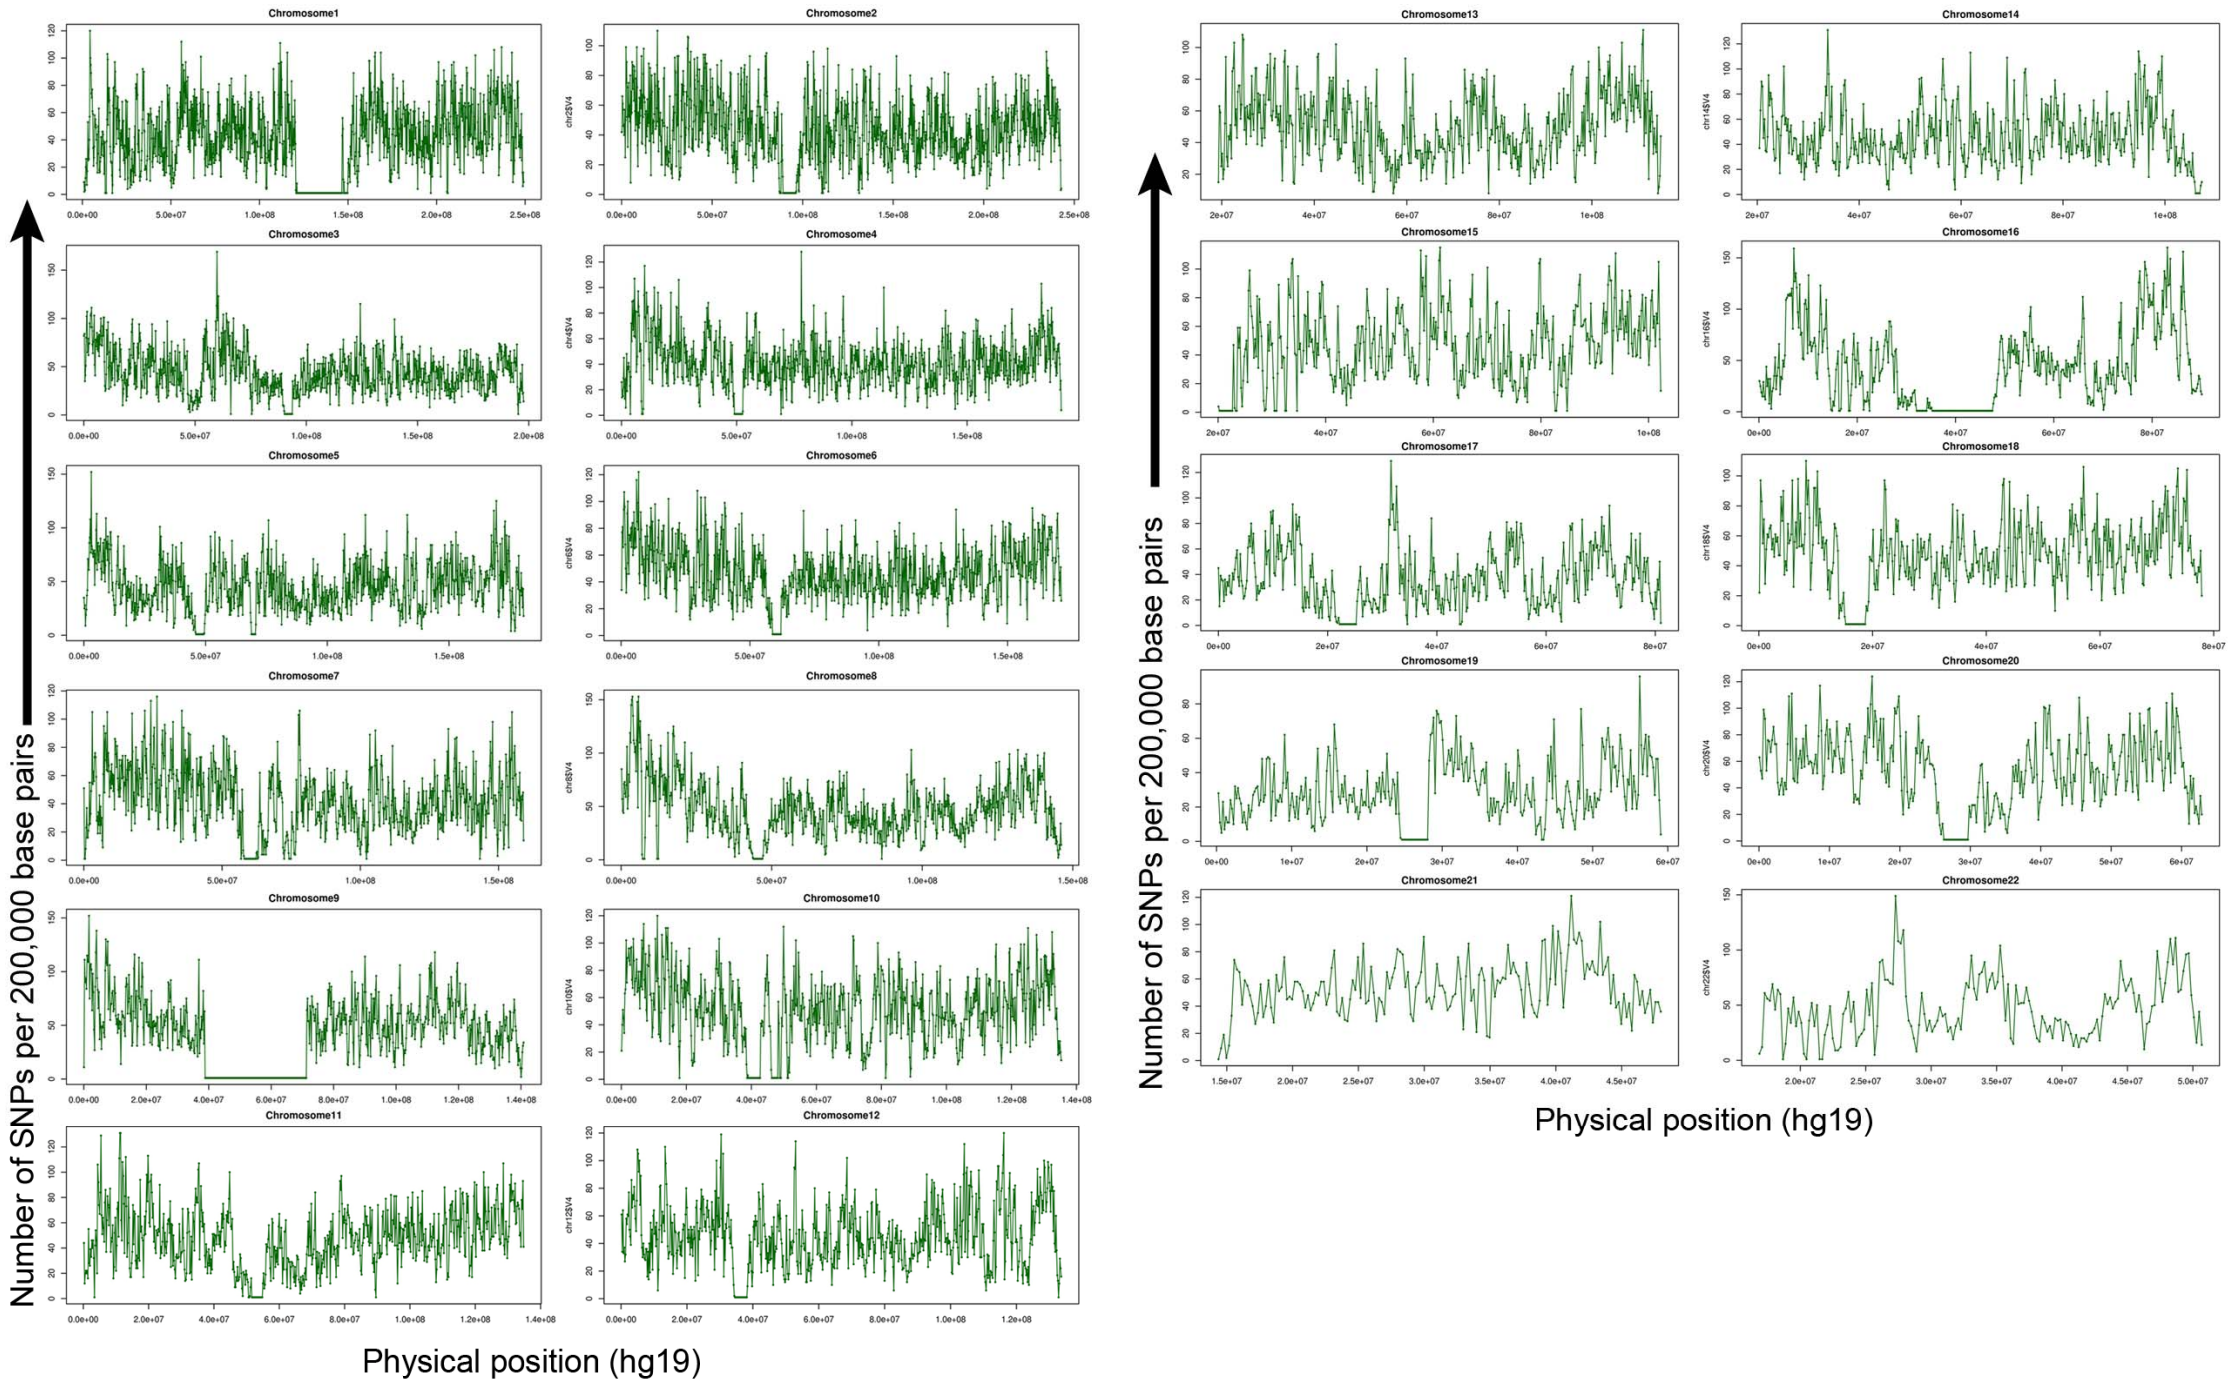

**Figure S3:** Multiple test correction for pathway-analysis with q-value.

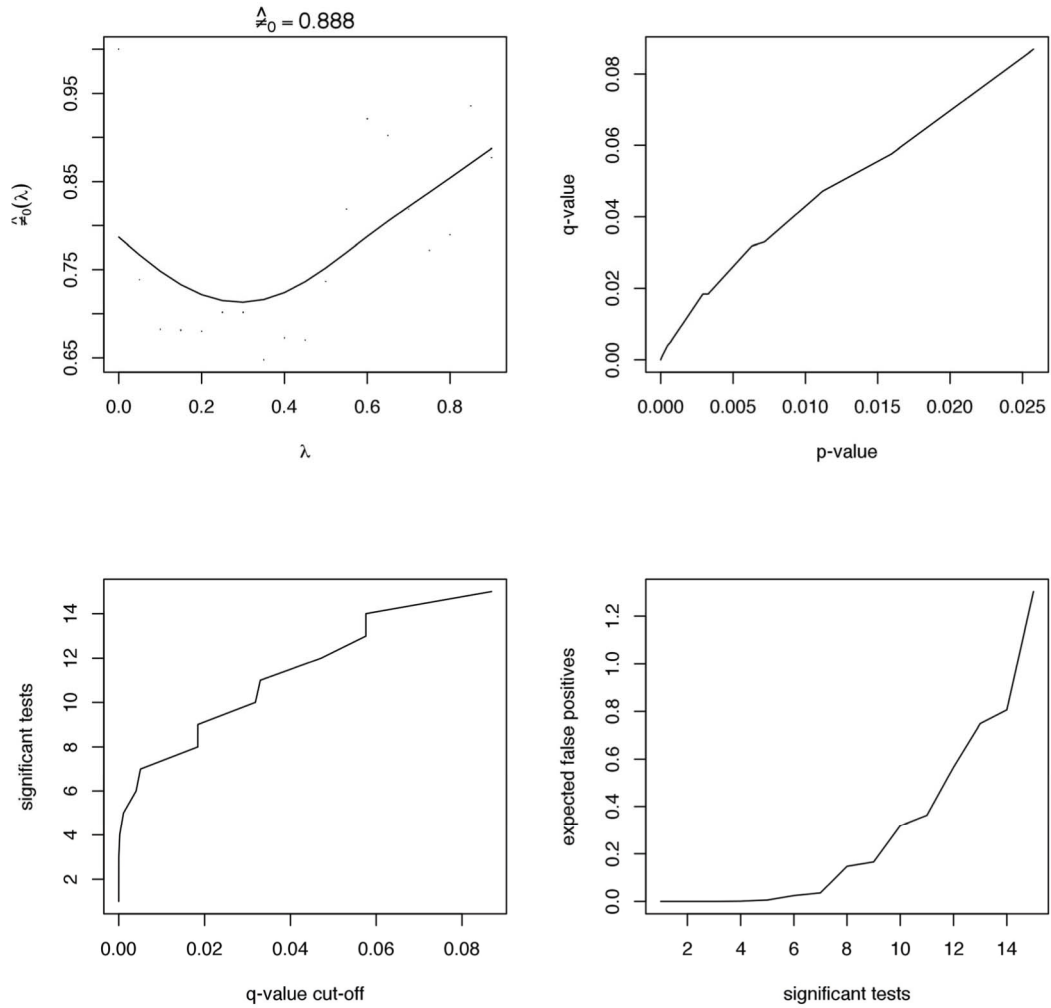

|         | <b>&lt;1e-04</b> | <b>&lt;0.001</b> | <b>&lt;0.01</b> | <b>&lt;0.025</b> | <b>&lt;0.05</b> | <b>&lt;0.1</b> | <b>&lt;1</b> |
|---------|------------------|------------------|-----------------|------------------|-----------------|----------------|--------------|
| p-value | 4                | 7                | 11              | 14               | 17              | 22             | 57           |
| q-value | 3                | 4                | 7               | 9                | 12              | 15             | 57           |

**Figure S4:** Distribution of allele frequency of hard-sweep signals in world populations.

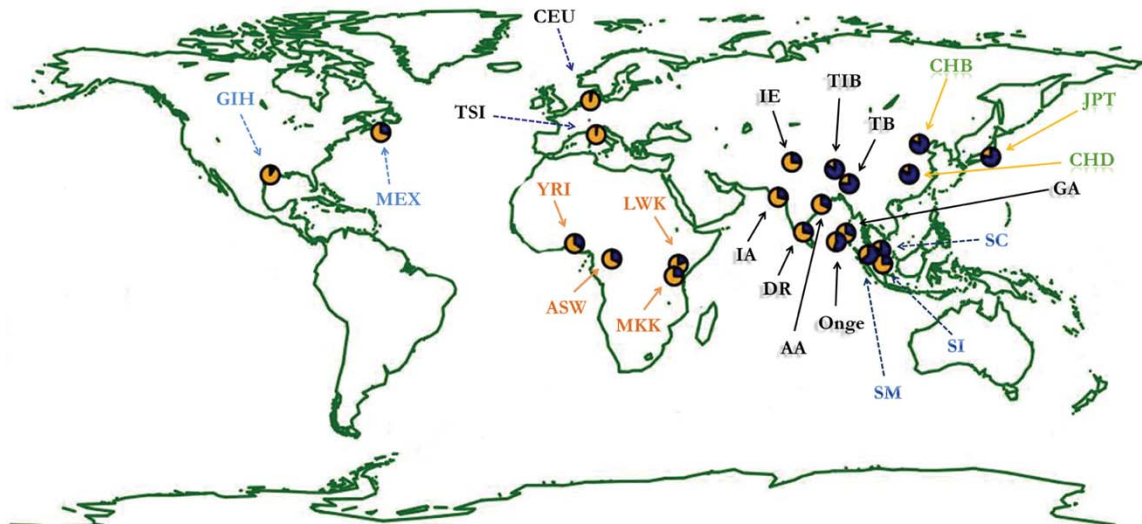

GIH: Gujarati Indians; MEX: Mexicans; YRI: Yoruba; ASW: African ancestry in South-West USA; MKK: Maasai; IA: Indo-Africans; DR: Dravidian; AA: Austro-Asiatic; IE: Indo-Europeans; TIB: Tibetans; TB: Tibeto-Burman; SM: Singapore-Malaysians; SI: Singapore-Indians; SC: Singapore-Chinese; GA: Great-Andamanese; CHD: Chinese-Denver; JPT: Japanese; CHB: Chinese-Beijing; LWK: Luhya; TSI: Tuscans; CEU: Utah residents with European ancestry

rs1851426

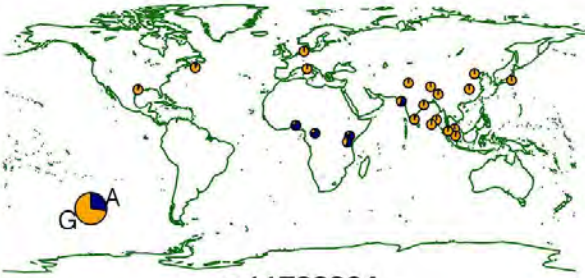

rs919840

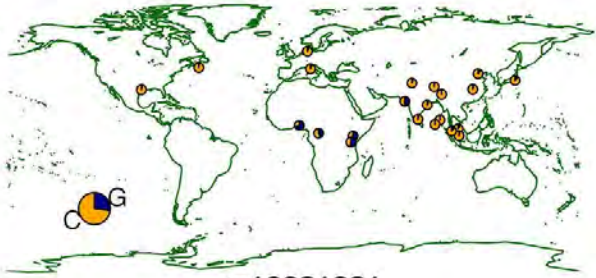

rs11723264

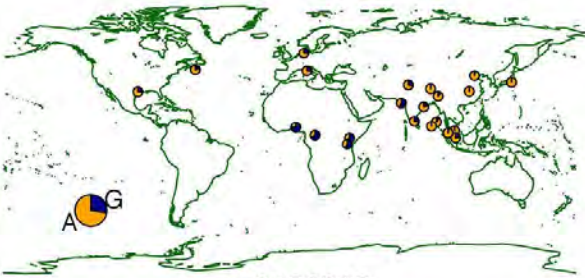

rs10281281

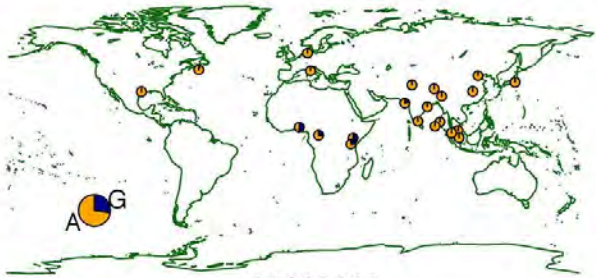

rs2196019

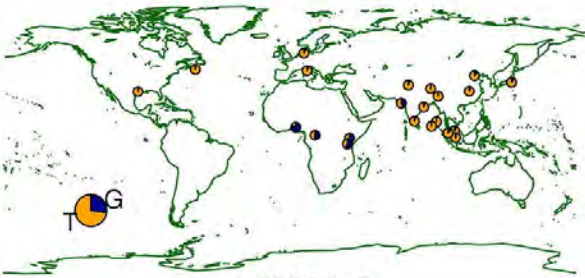

rs11103482

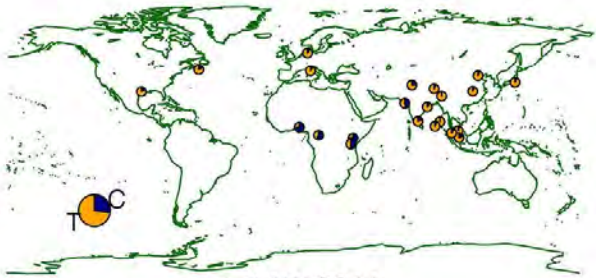

rs2622610

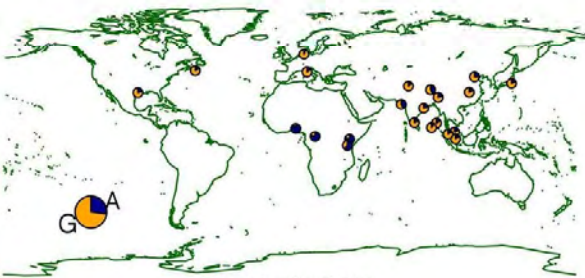

rs11712211

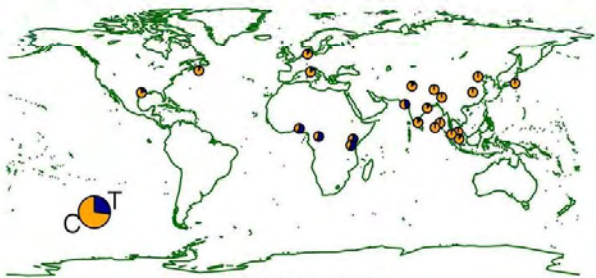

rs2725267

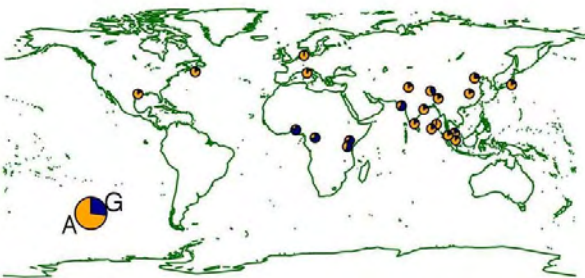

rs1403527

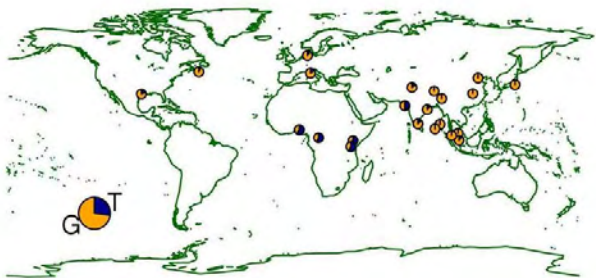

rs6008197

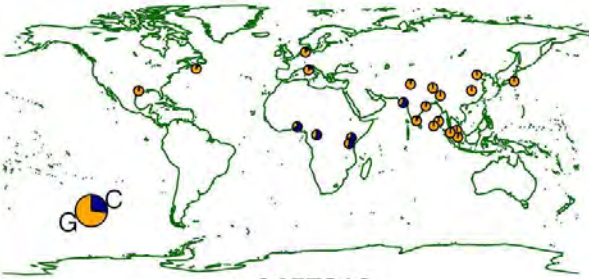

rs10047560

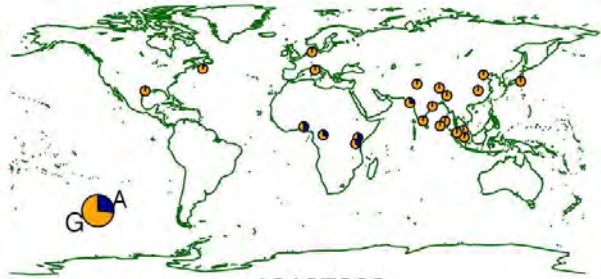

rs6457816

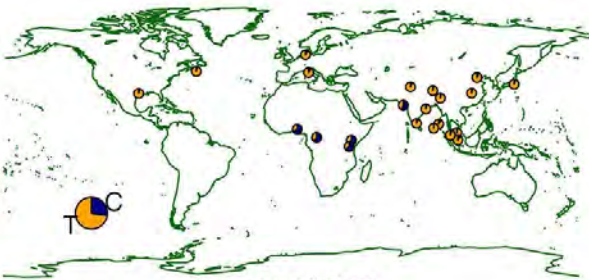

rs10137990

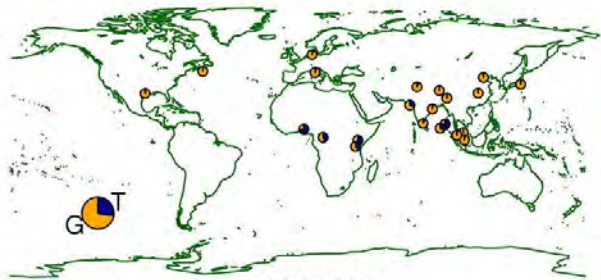

rs6906237

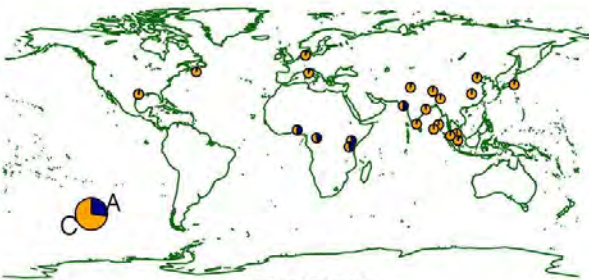

rs1042026

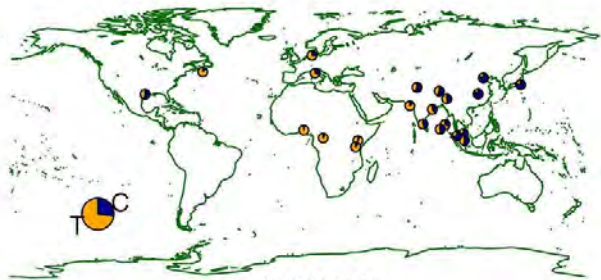

rs7627605

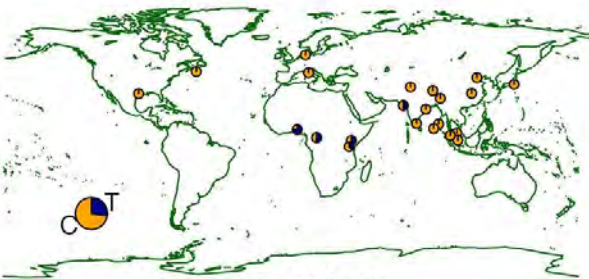

rs10438016

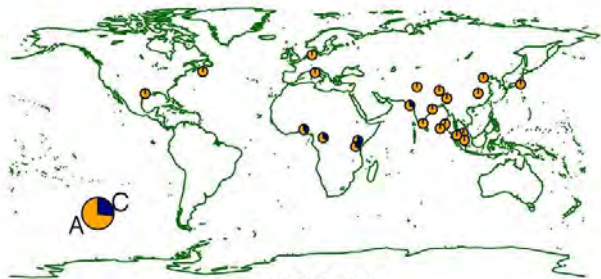

rs9658100

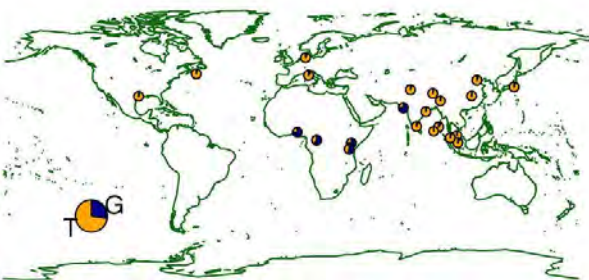

rs1056836

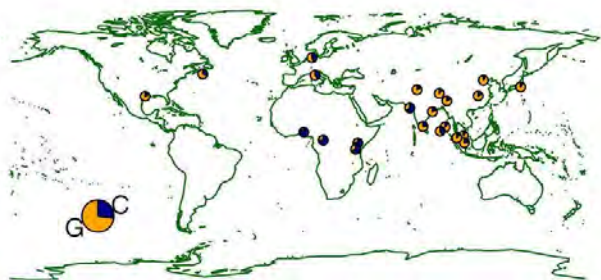

rs12027066

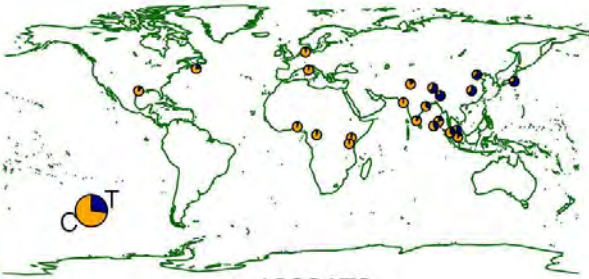

rs2161850

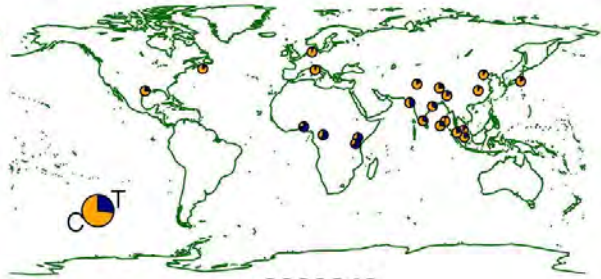

rs1230178

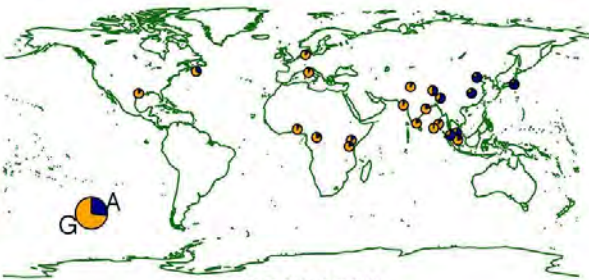

rs2339840

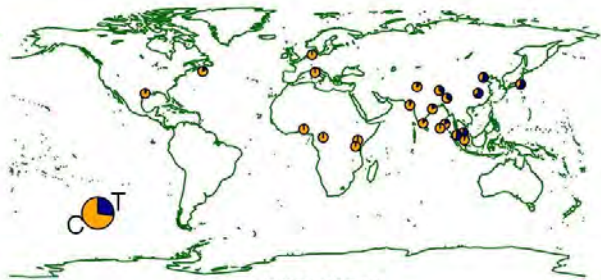

rs12334538

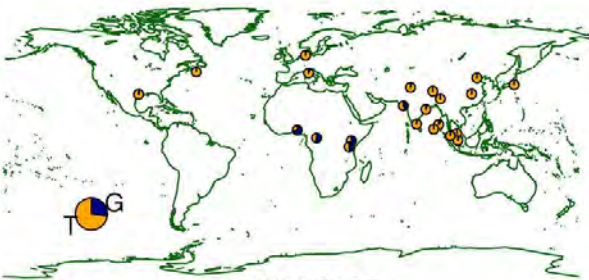

rs2671272

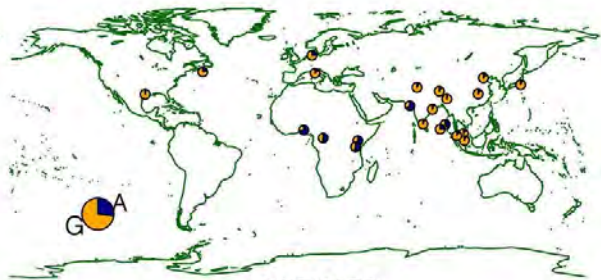

rs12909230

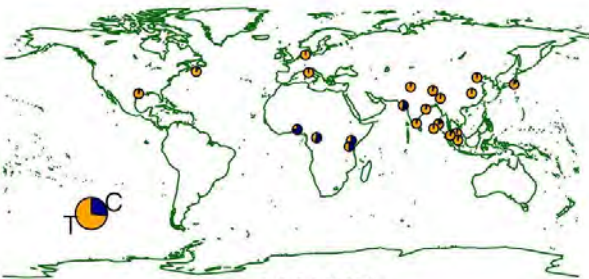

rs2854450

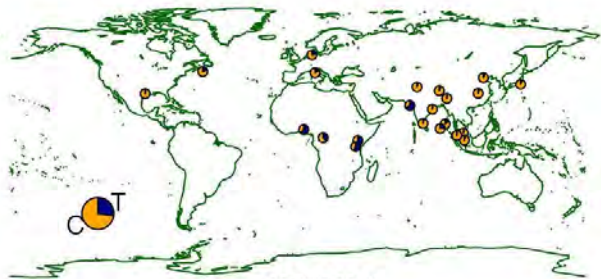

rs1441817

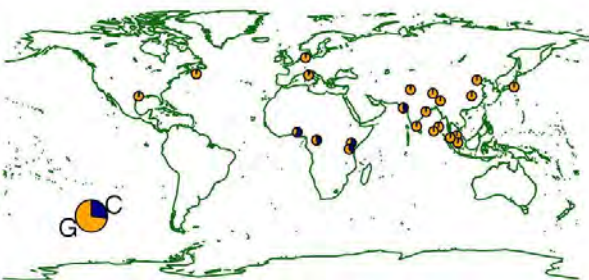

rs3805322

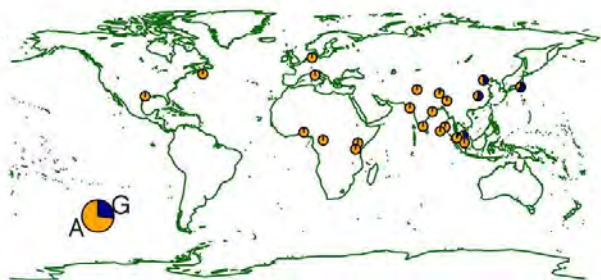



rs6558002

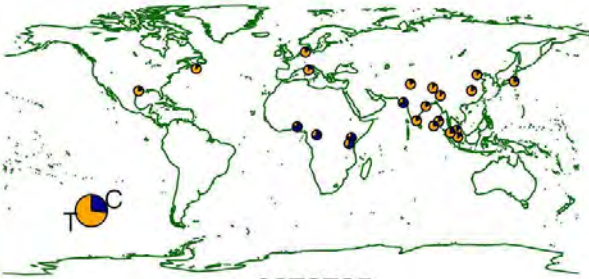

rs7829823

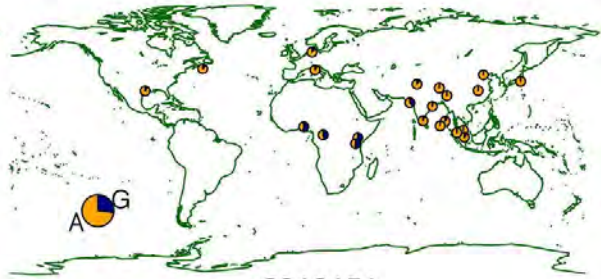

rs6870785

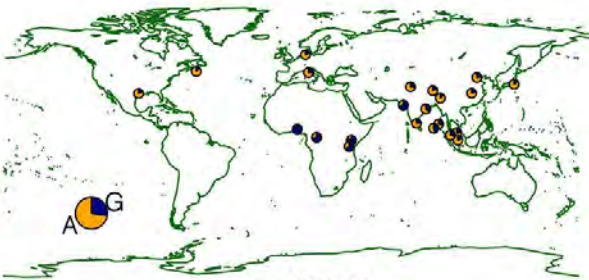

rs8010151

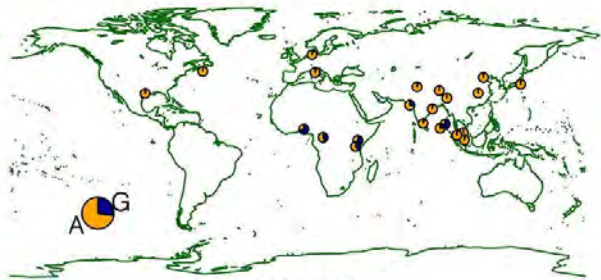

rs7015380

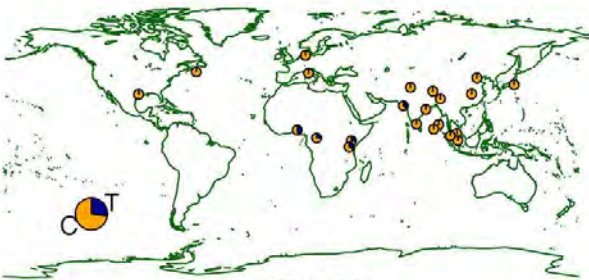

rs9805889

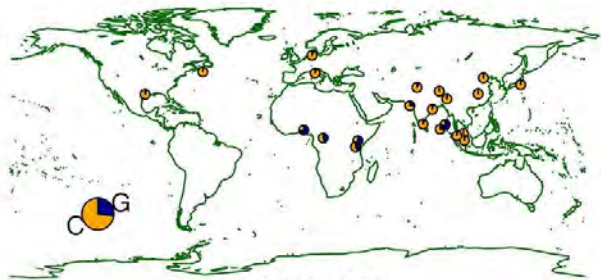

rs7683532

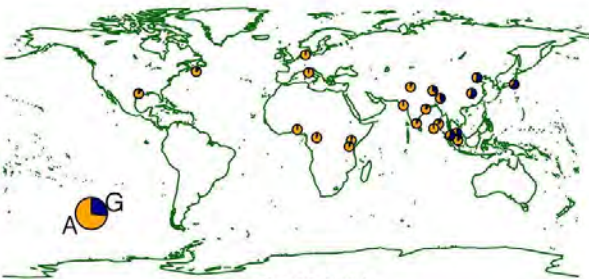

rs11934139

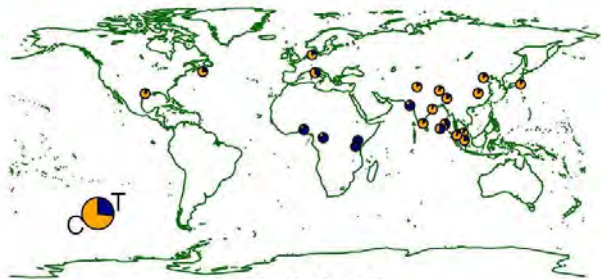

rs7736031

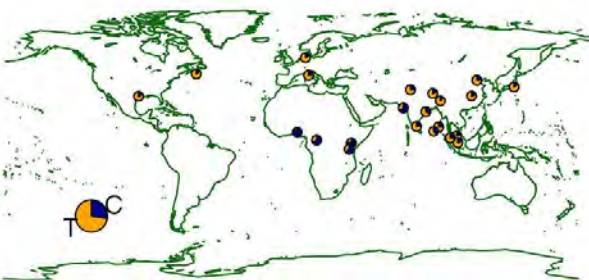

rs13148869

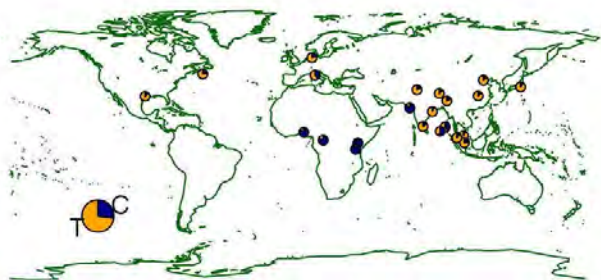

rs4834424

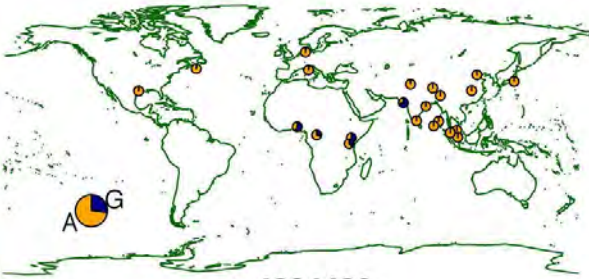

rs6831964

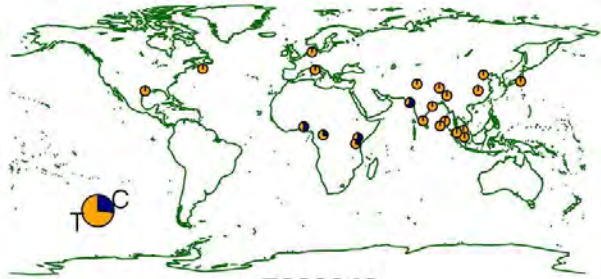

rs4834426

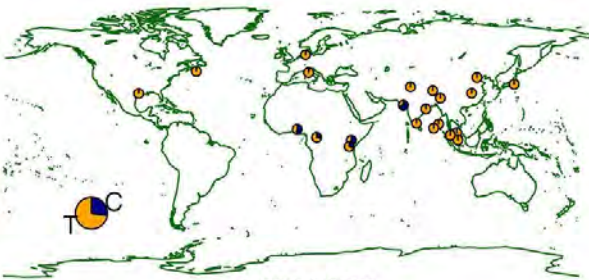

rs7686242

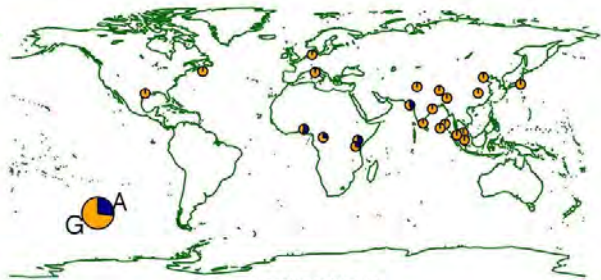

rs4834427

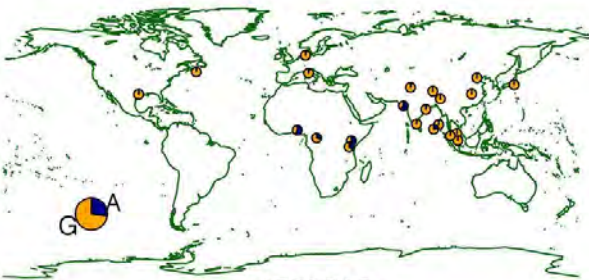

rs7906892

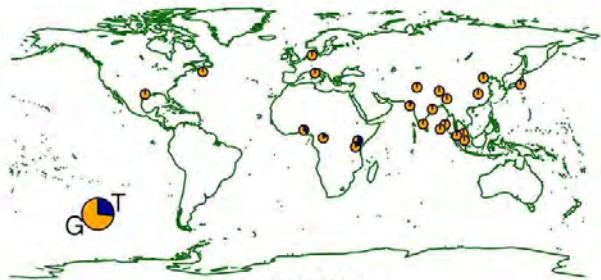

rs6533218

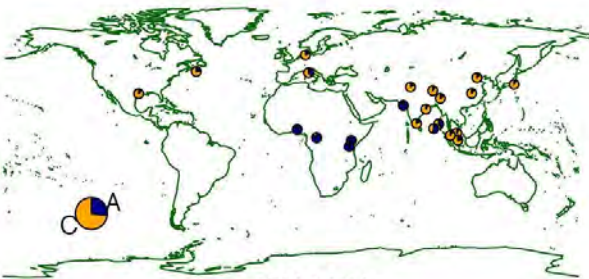

rs835316

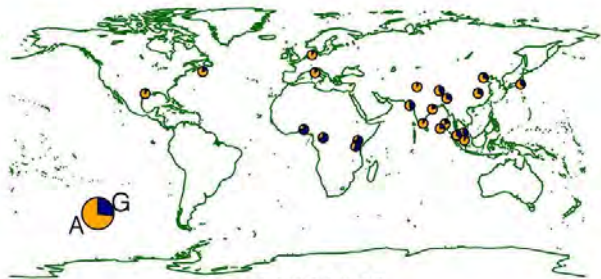

rs6815181

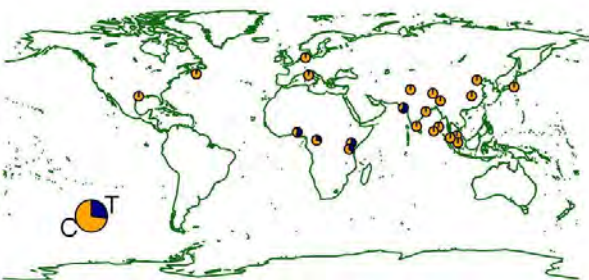

rs11231300

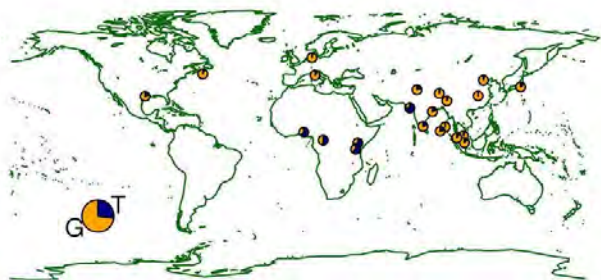

rs225372

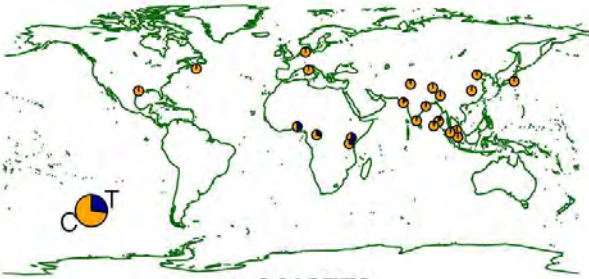

rs4148641

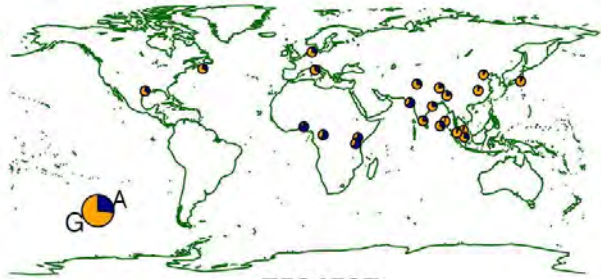

rs2413770

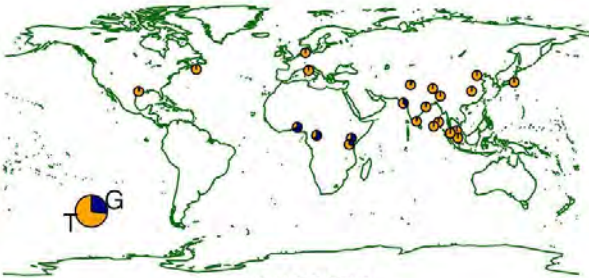

rs7524567

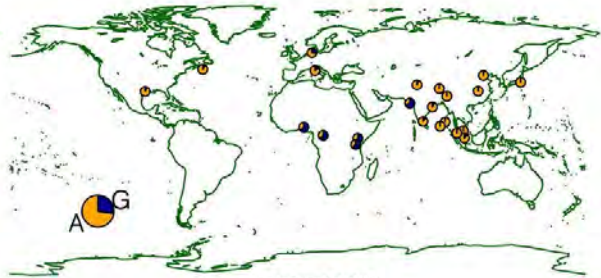

rs3213473

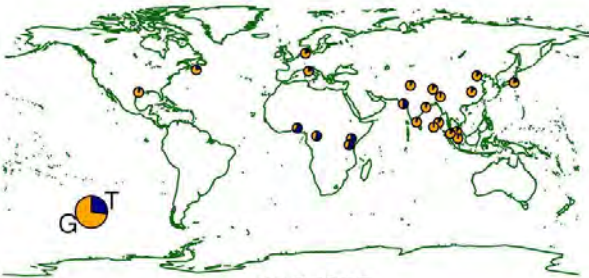

rs7767808

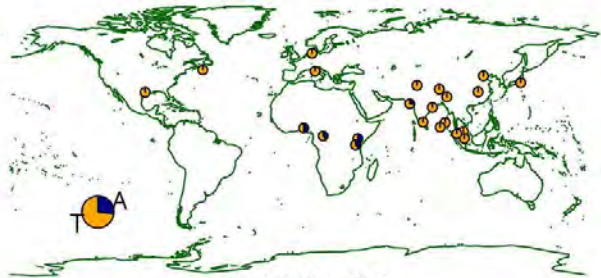

rs3847305

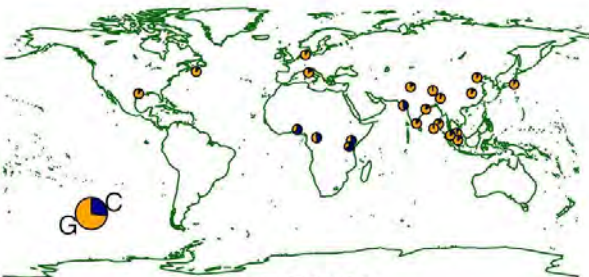

rs16834954

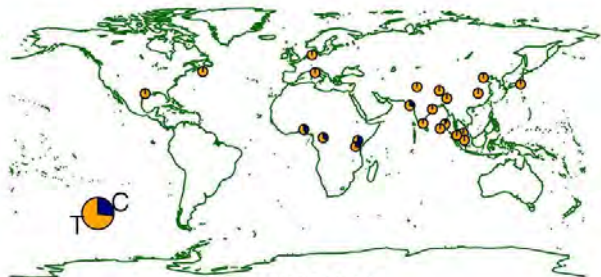

rs4075845

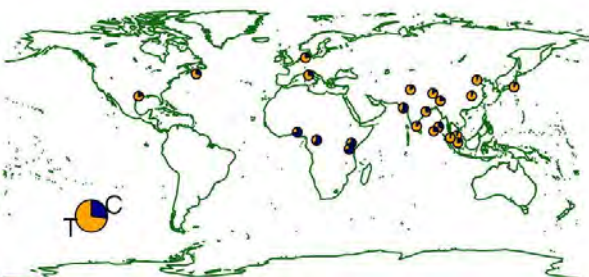

rs6697130

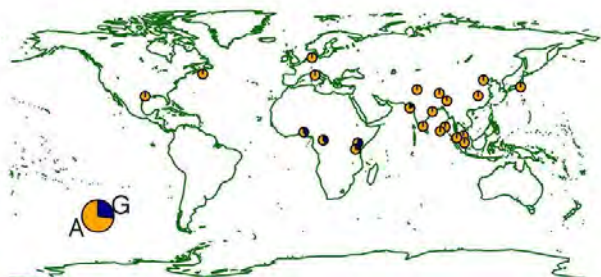

rs7539947

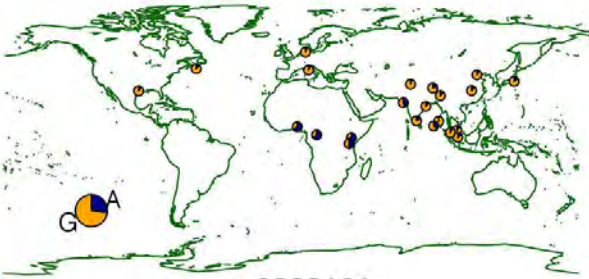

rs3766989

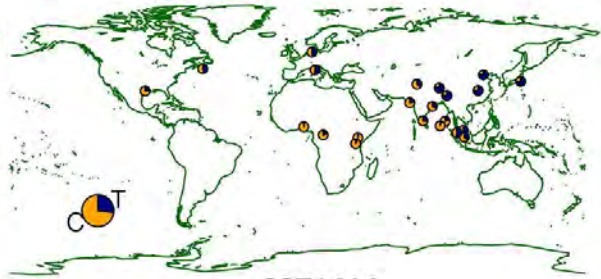

rs6668161

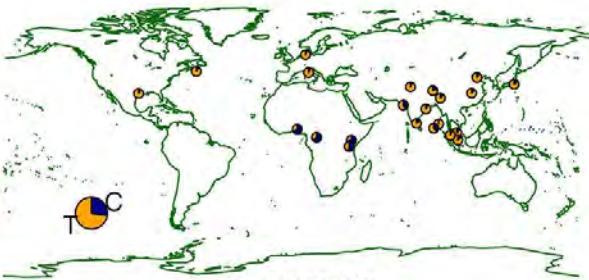

rs2271414

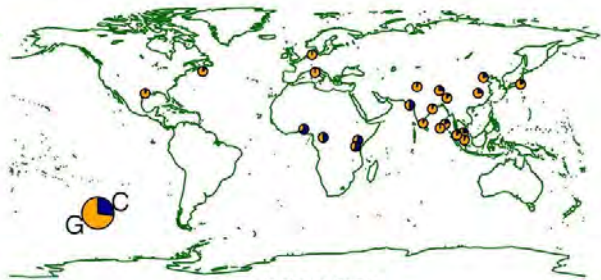

rs1407716

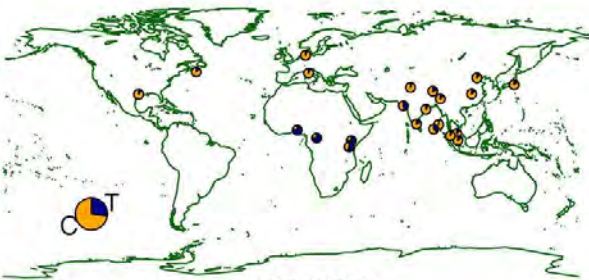

rs2999479

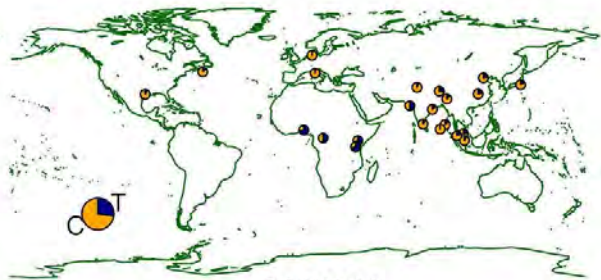

rs6428896

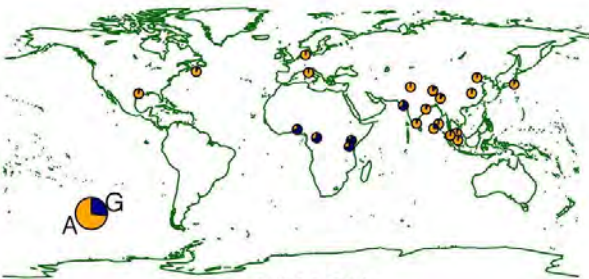

rs6429196

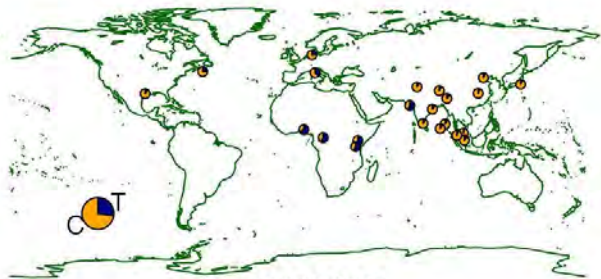

rs6681761

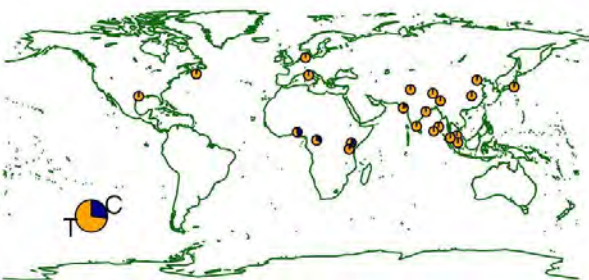

rs6429197

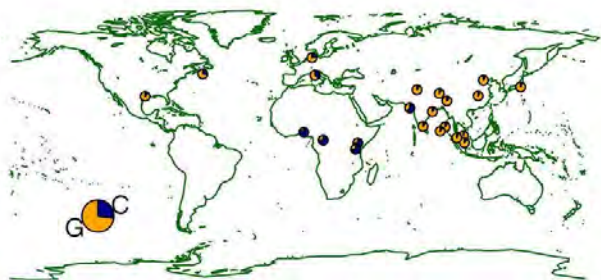

rs17023214

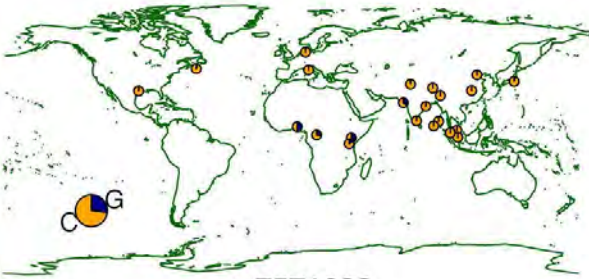

rs7592092

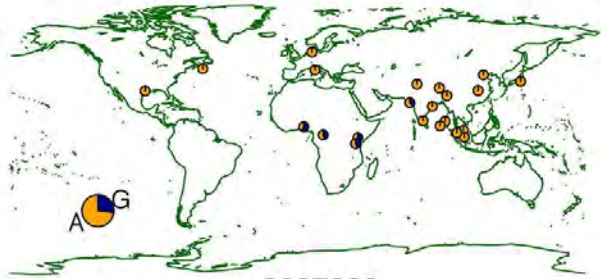

rs7571608

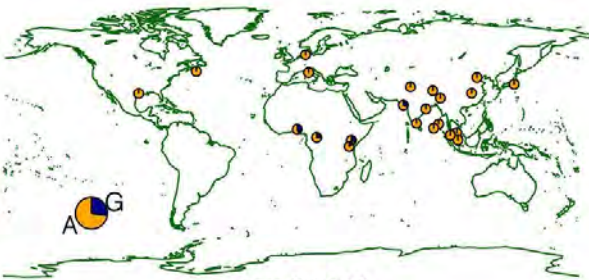

rs9287889

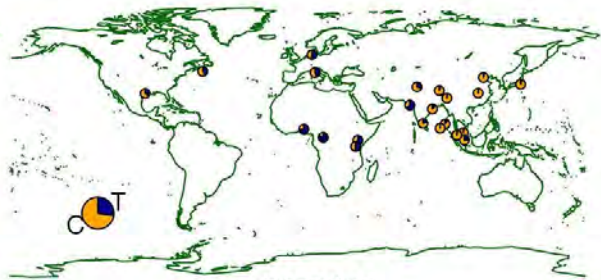

rs7564481

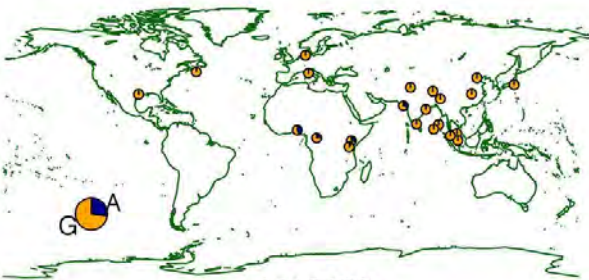

rs2459611

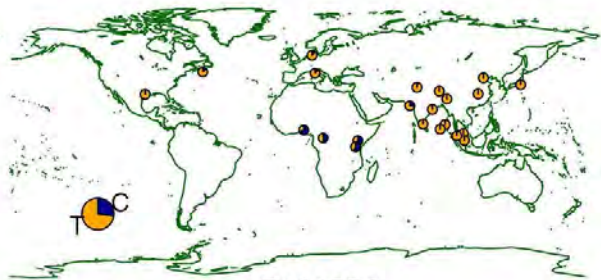

rs4413199

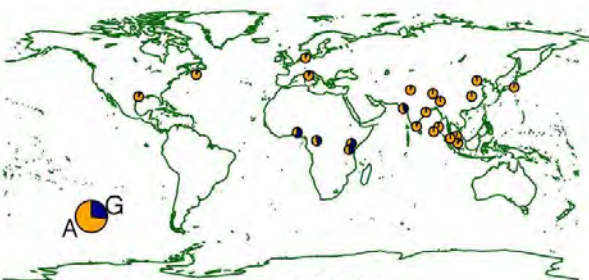

rs7601754

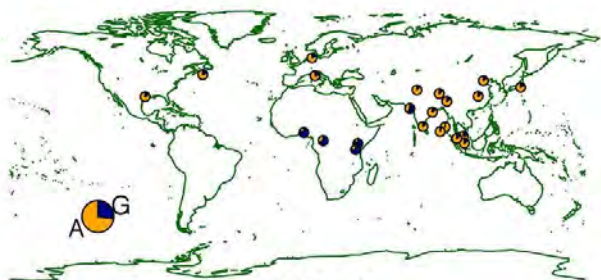

rs3924521

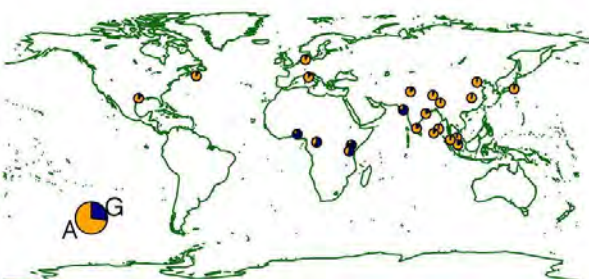

rs10931480

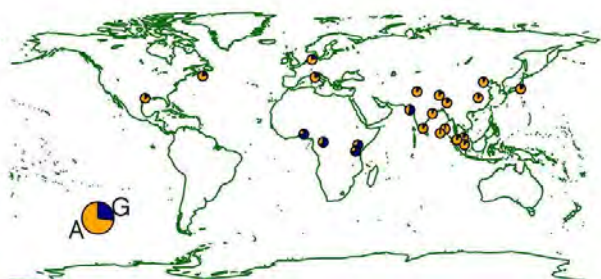

rs6435649

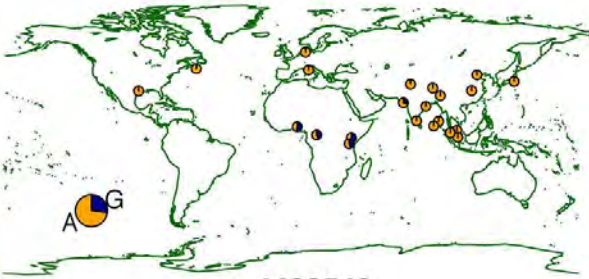

rs6435689

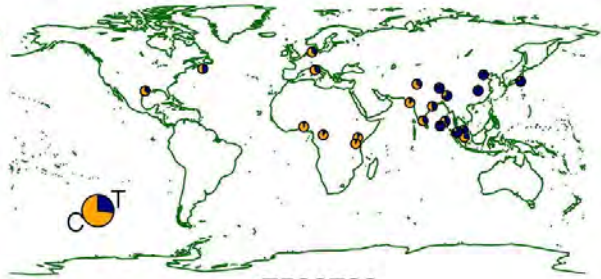

rs4423543

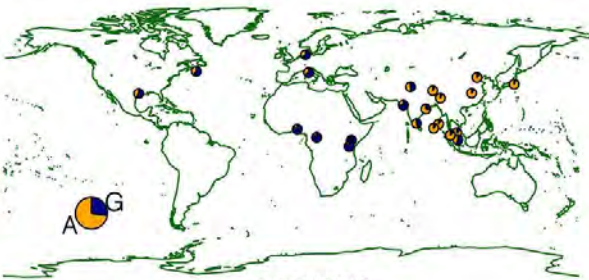

rs7560730

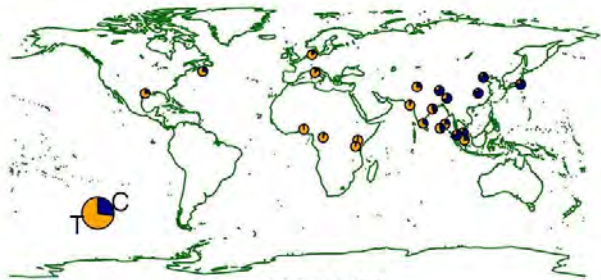

rs2139939

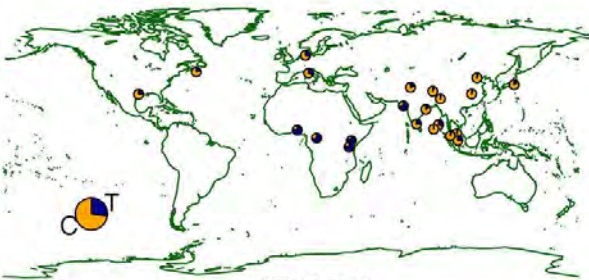

rs1357142

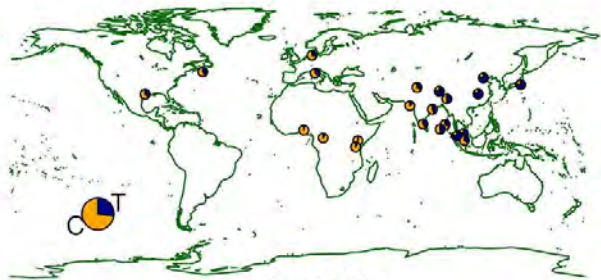

rs1521553

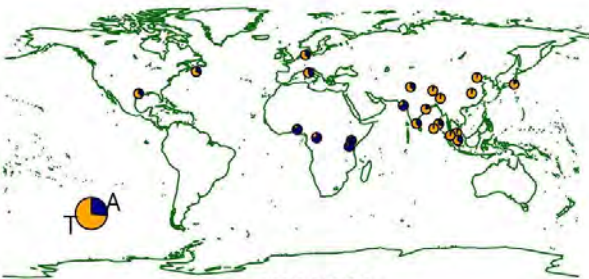

rs1521652

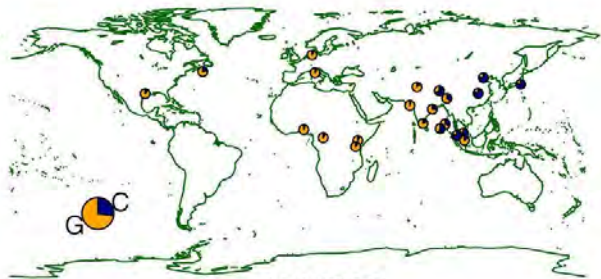

rs1521550

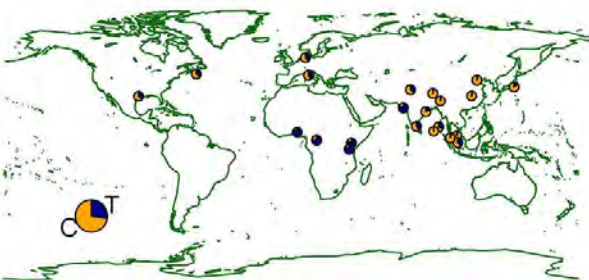

rs1012747

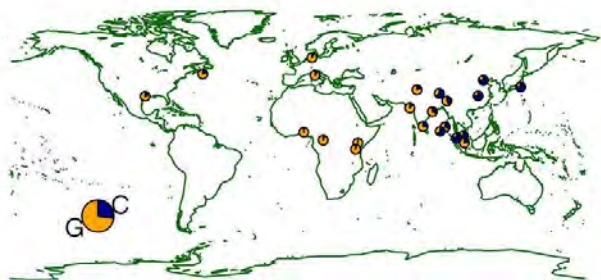

rs6766988

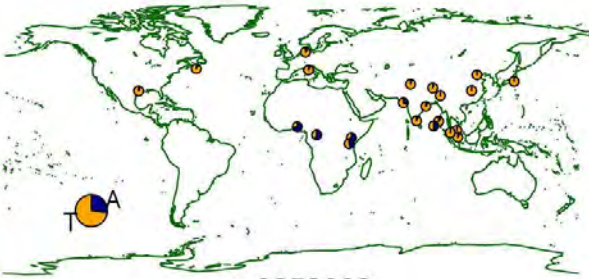

rs4681443

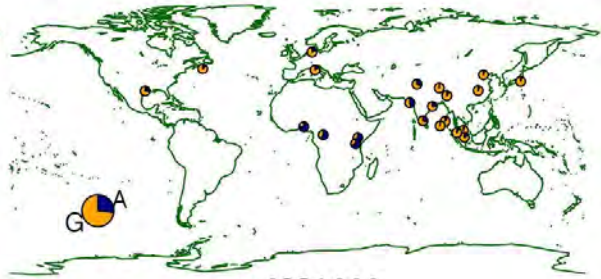

rs9853660

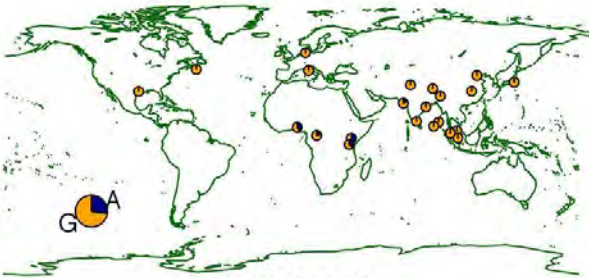

rs4681444

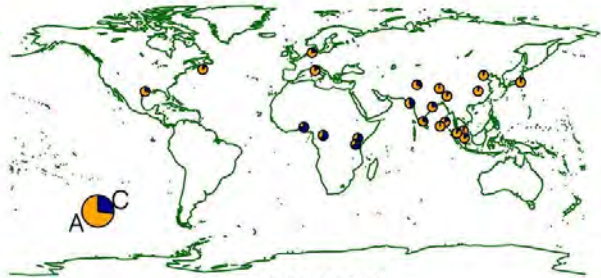

rs9810700

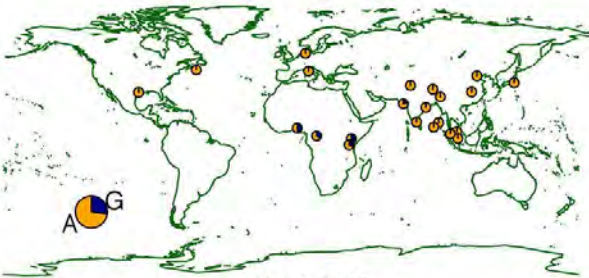

rs1492100

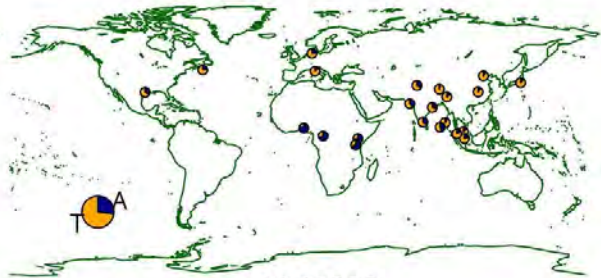

rs9847961

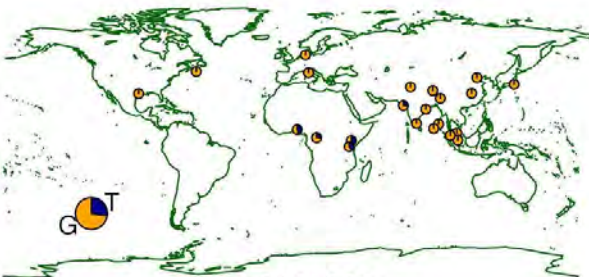

rs2342309

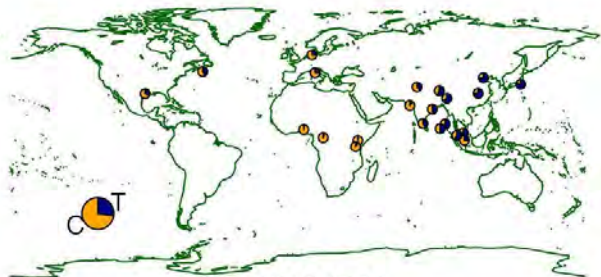

rs4681440

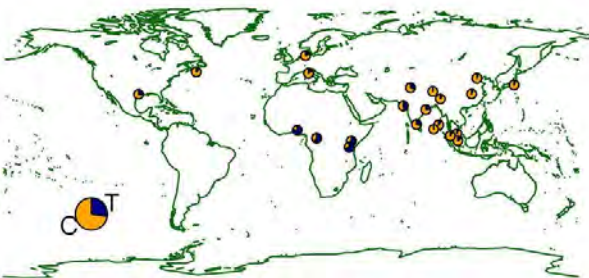

rs12632779

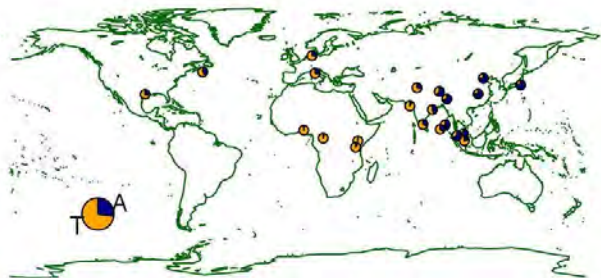

rs4698804

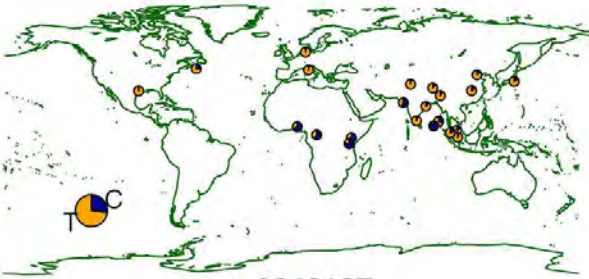

rs4488887

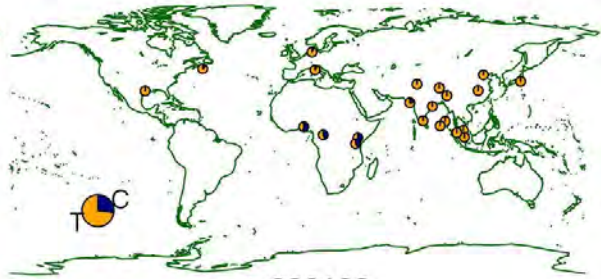

rs6840127

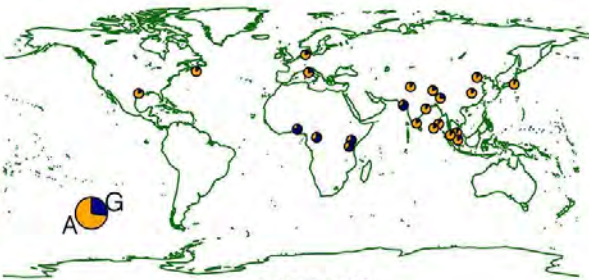

rs326162

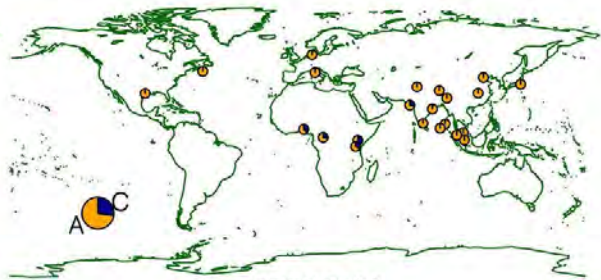

rs2171083

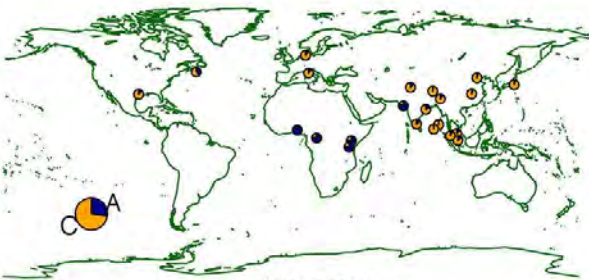

rs17589633

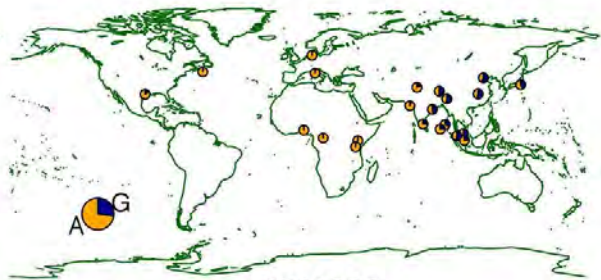

rs1995083

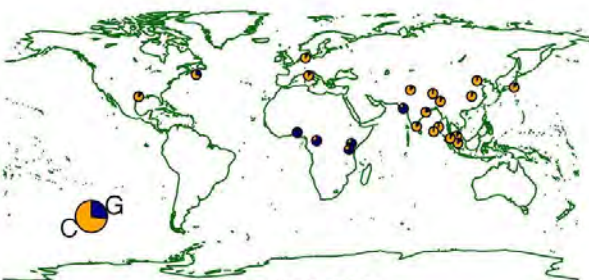

rs3891334

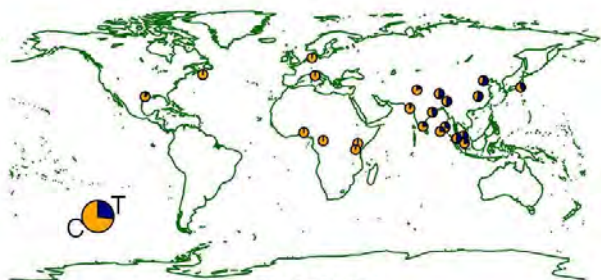

rs6857752

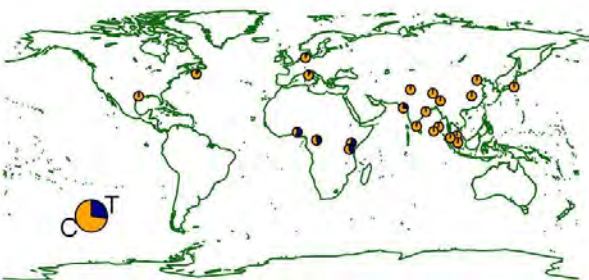

rs16889853

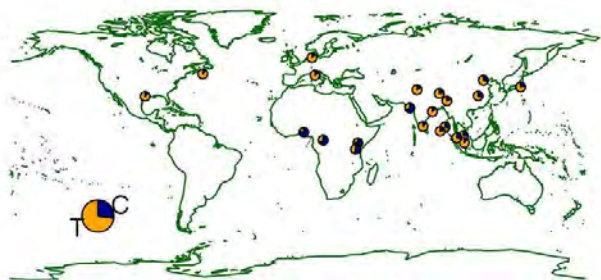



rs1949017

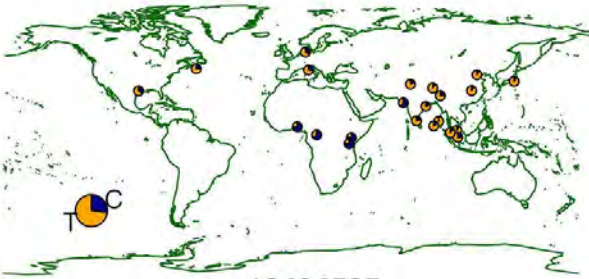

rs9442844

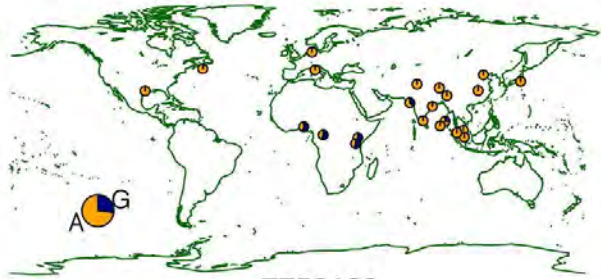

rs10434525

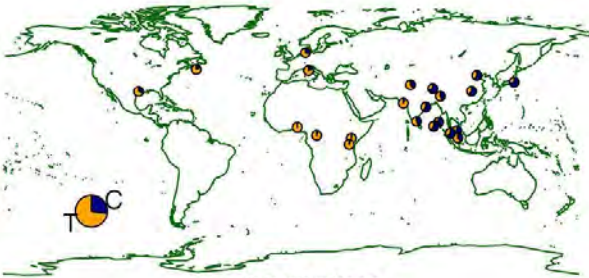

rs7756180

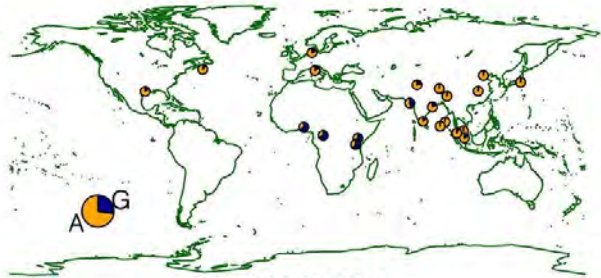

rs12515974

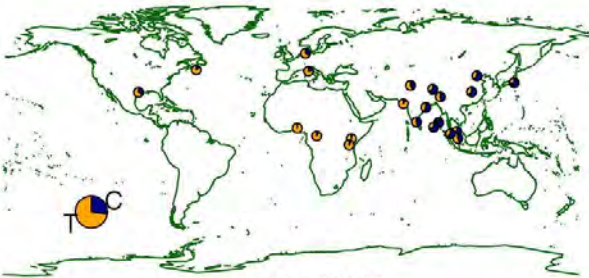

rs2840799

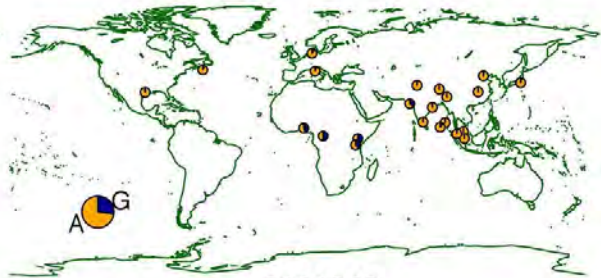

rs13361335

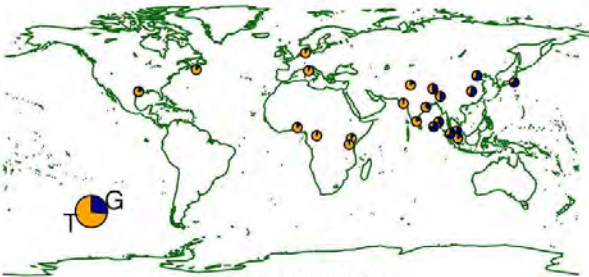

rs6921049

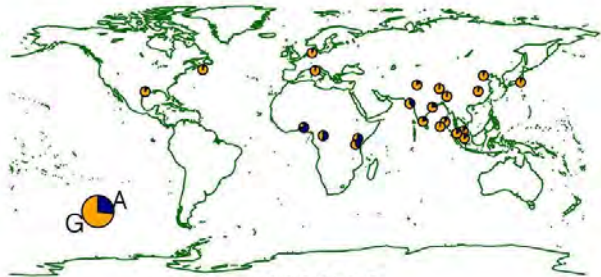

rs9293908

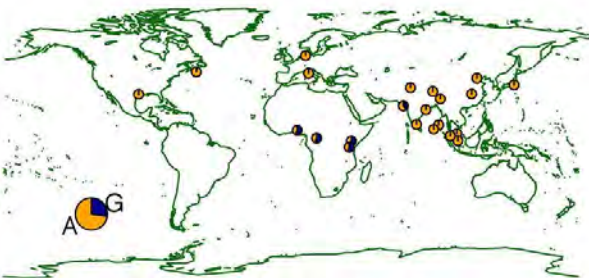

rs9446834

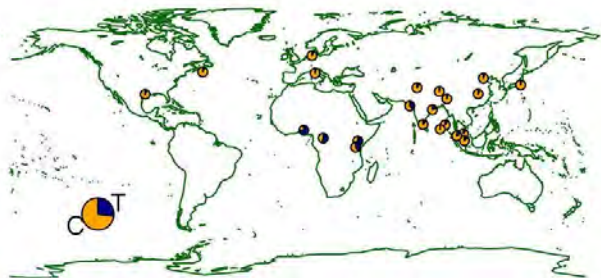

rs801763

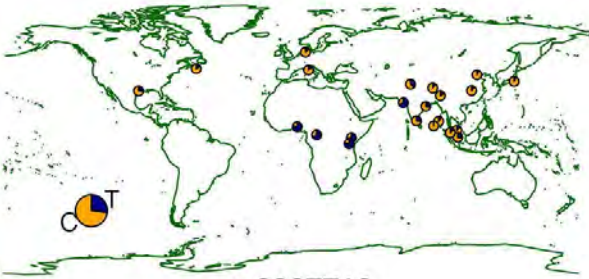

rs10270837

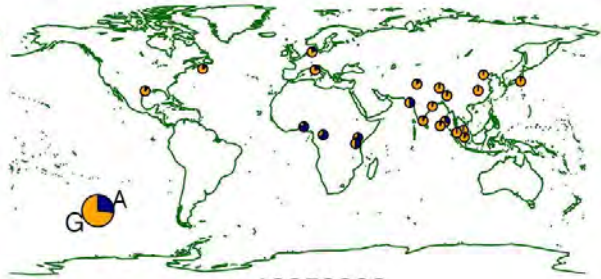

rs2267716

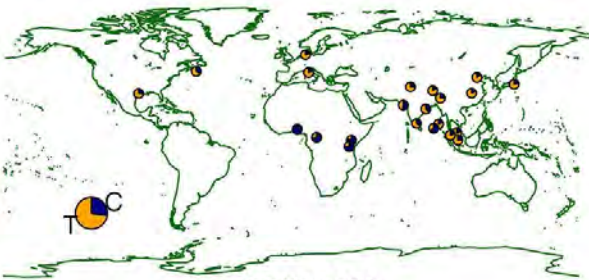

rs10252208

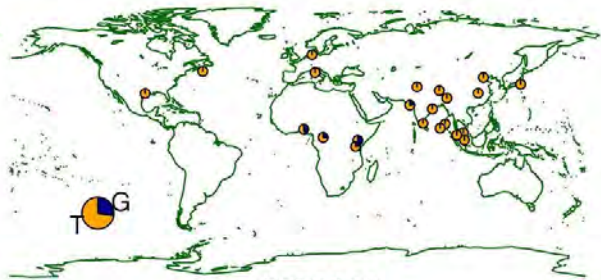

rs12668421

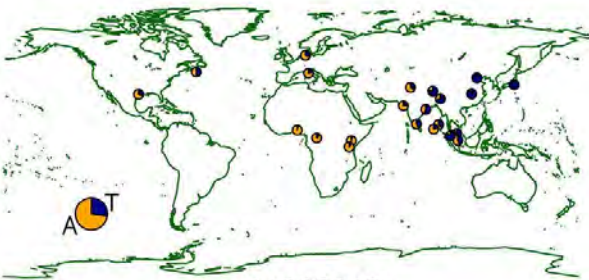

rs2270163

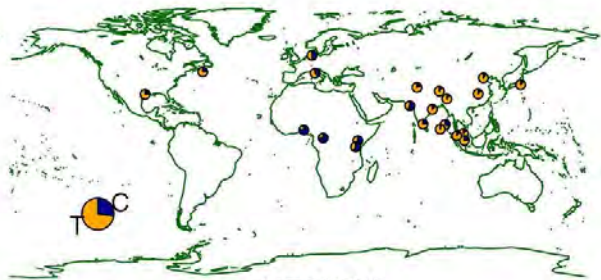

rs11238349

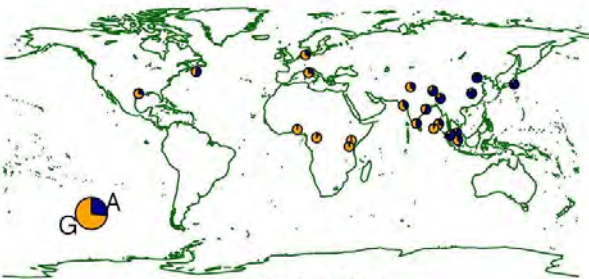

rs11765596

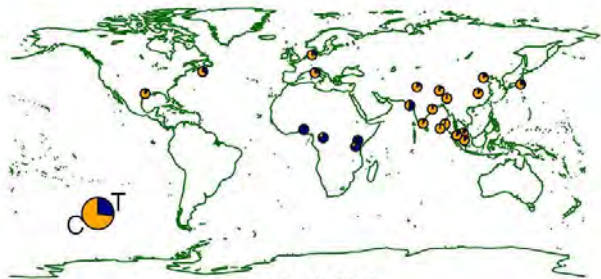

rs7781264

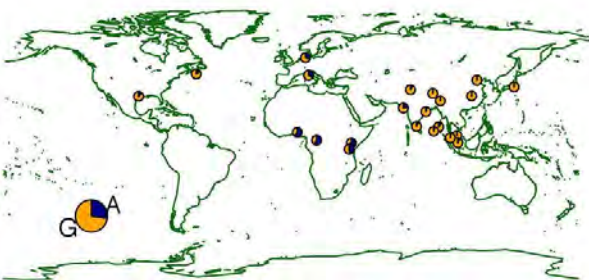

rs1029951

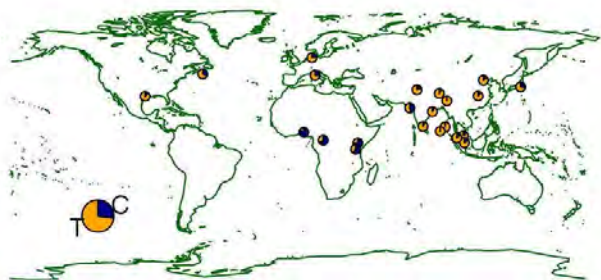

rs418362

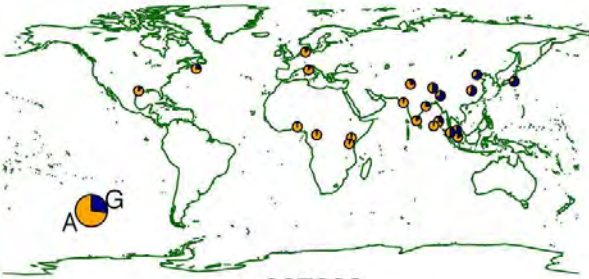

rs16879442

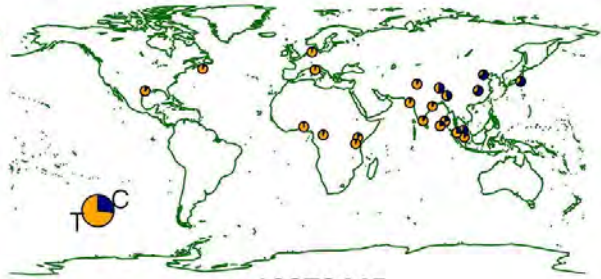

rs367830

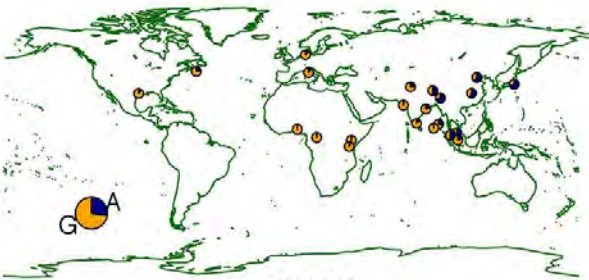

rs16879445

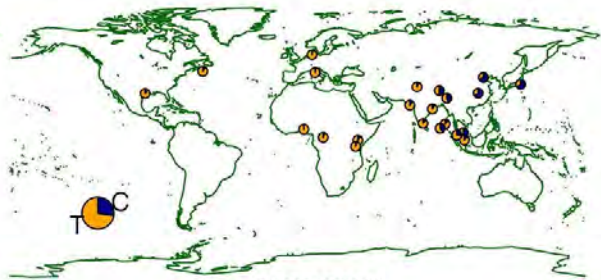

rs327415

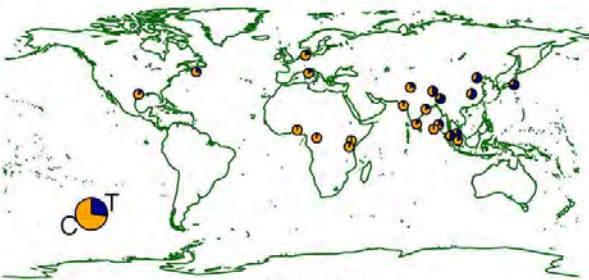

rs12679324

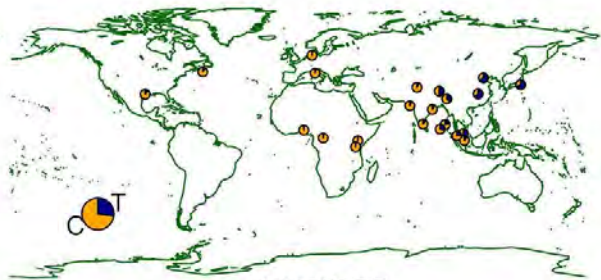

rs1381871

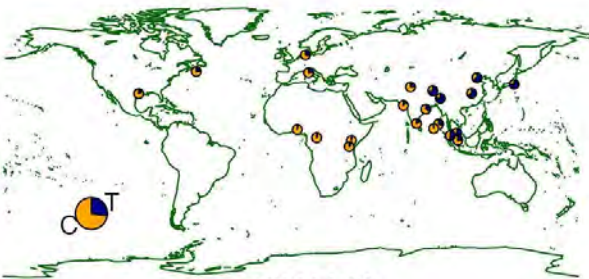

rs16879557

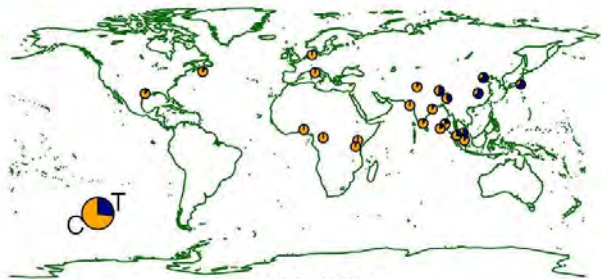

rs7821196

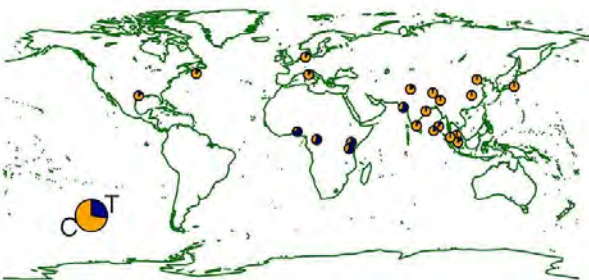

rs6982753

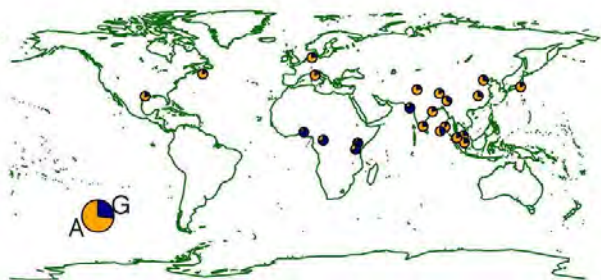

rs7815277

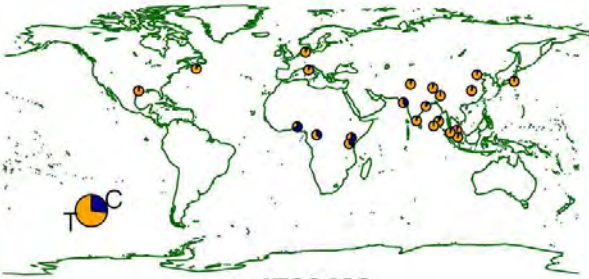

rs944481

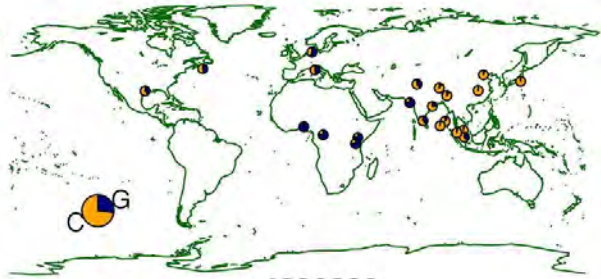

rs4736462

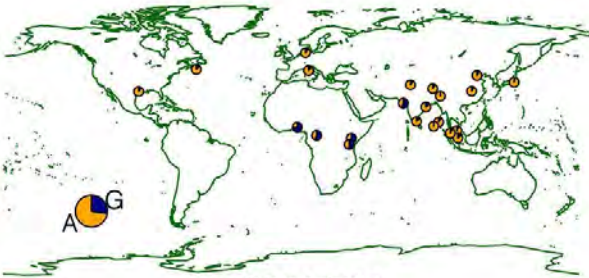

rs4836886

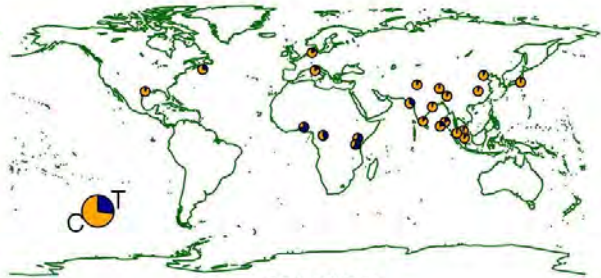

rs12545796

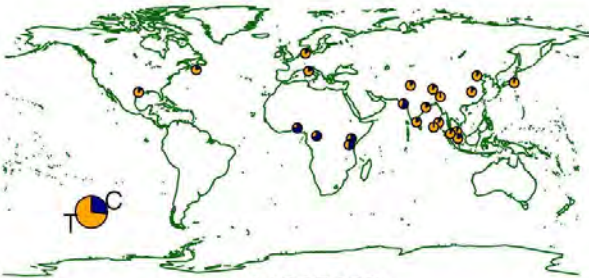

rs4836887

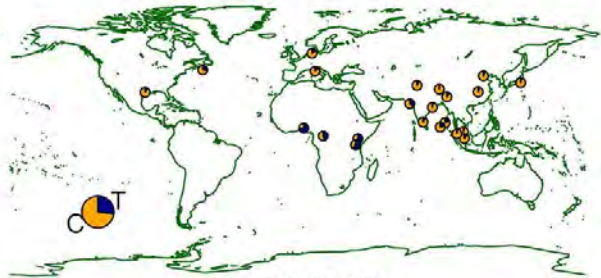

rs11995439

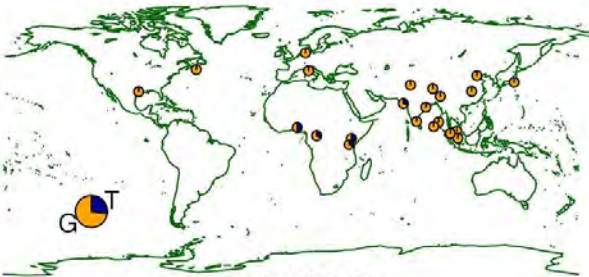

rs4836888

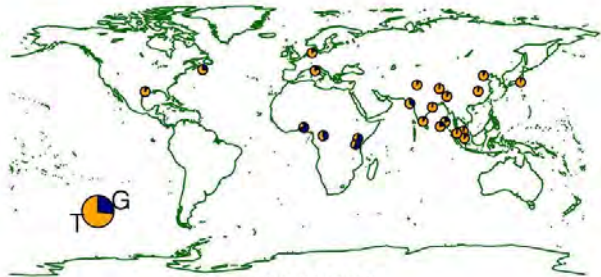

rs4736727

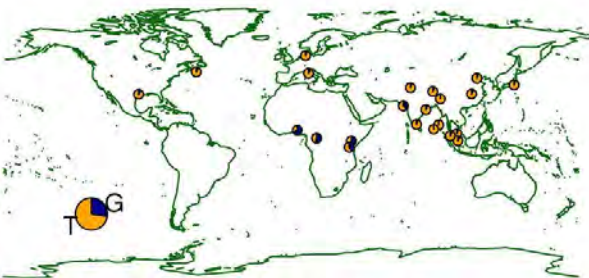

rs9299280

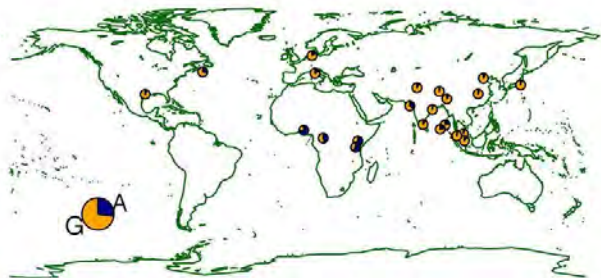

rs11596750

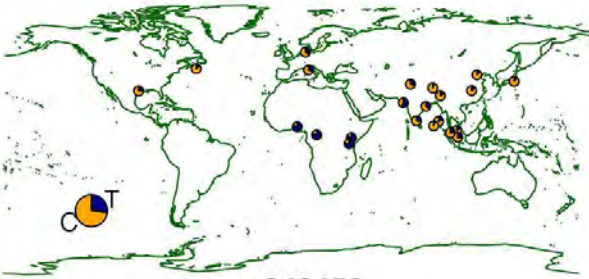

rs3737180

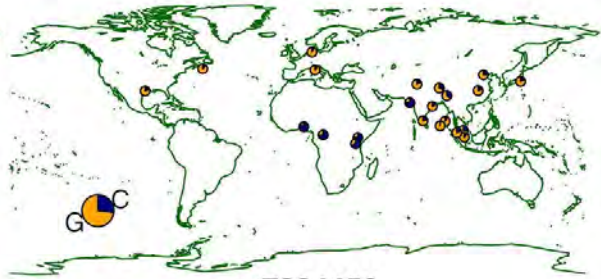

rs943450

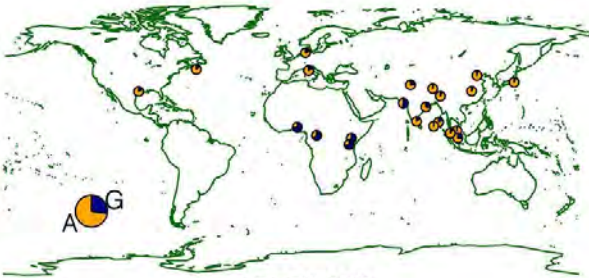

rs7894459

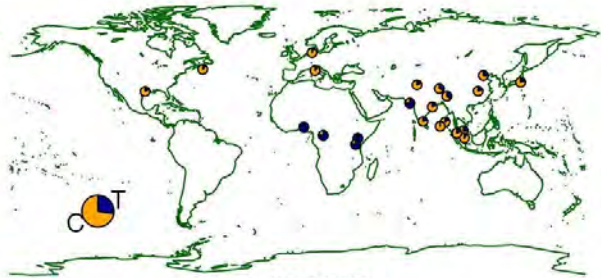

rs7072496

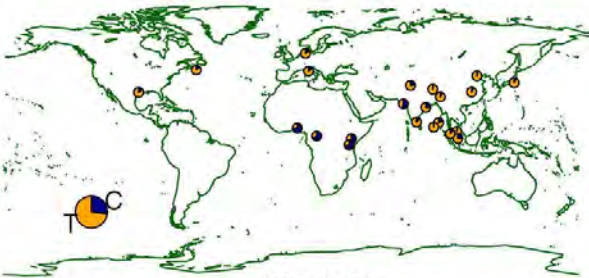

rs161279

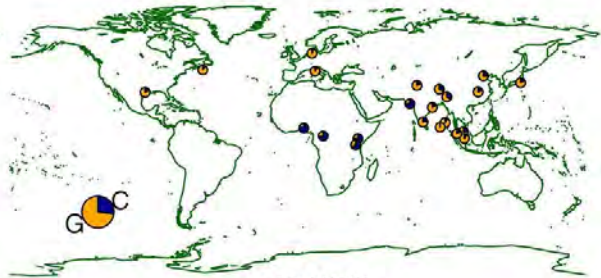

rs1887327

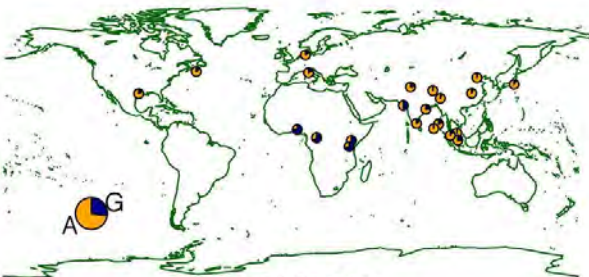

rs161258

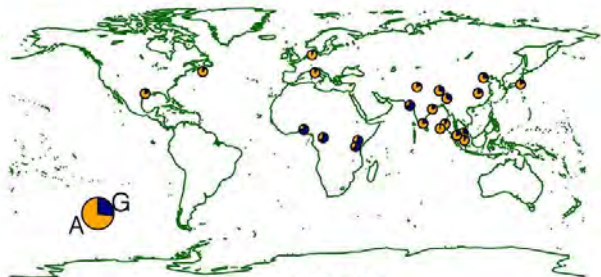

rs4623785

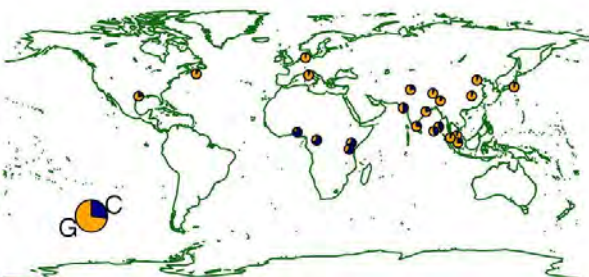

rs161272

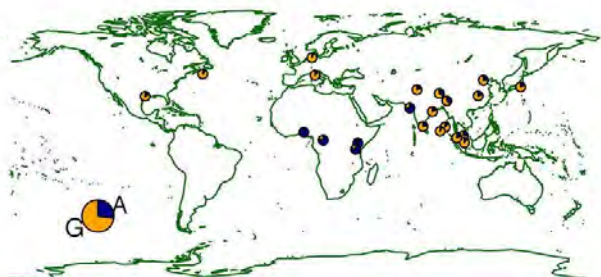

rs7915217

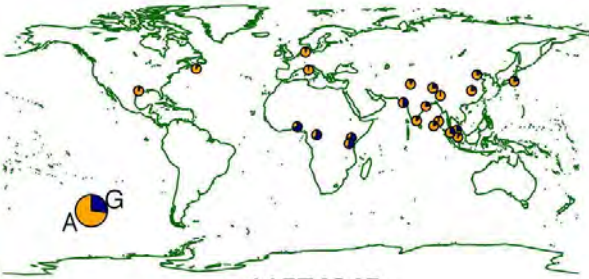

rs2420942

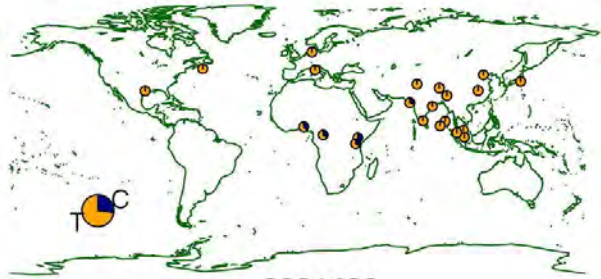

rs11574845

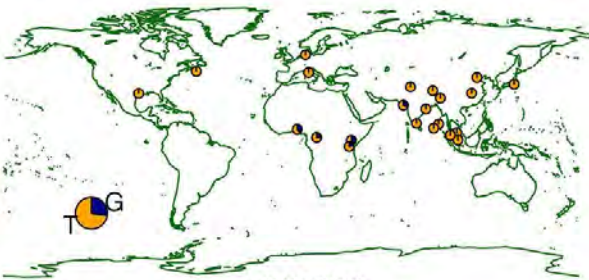

rs2981439

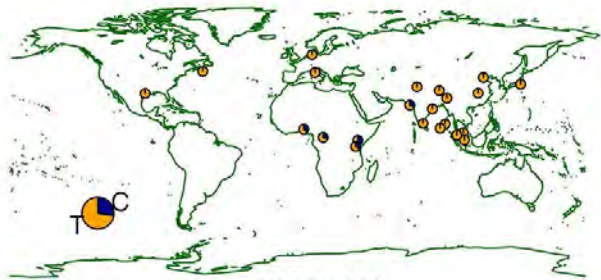

rs363333

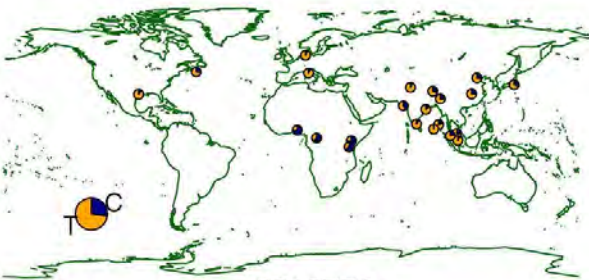

rs11814493

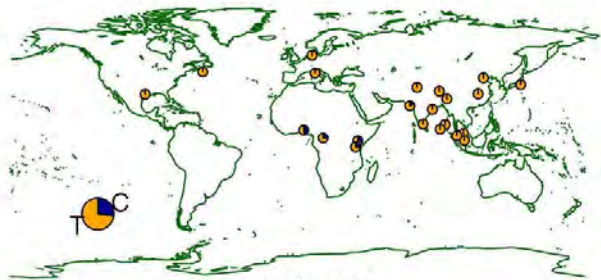

rs2912754

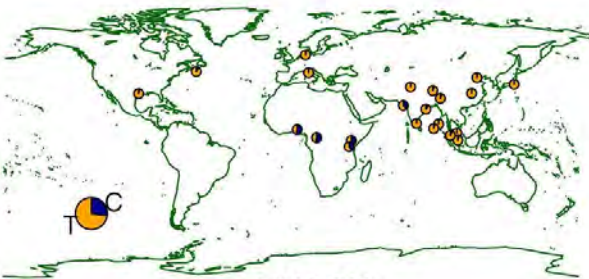

rs12364575

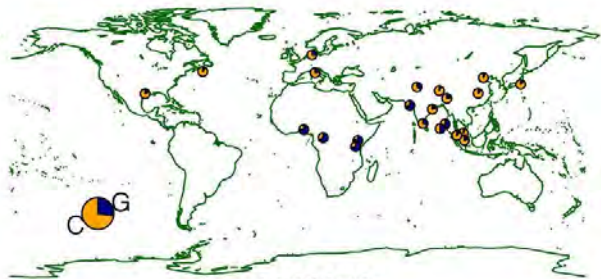

rs2912759

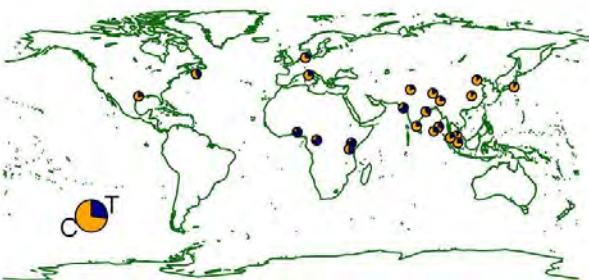

rs11231735

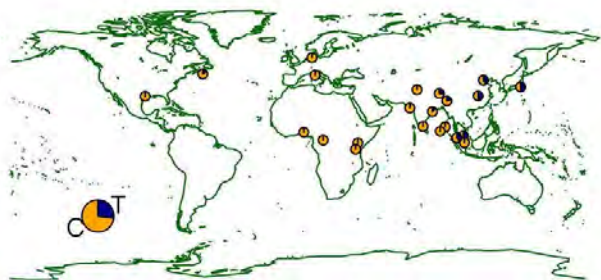

rs7957163

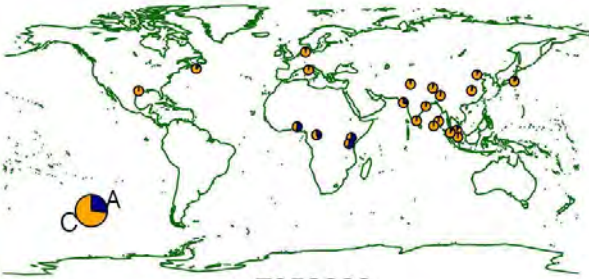

rs1554807

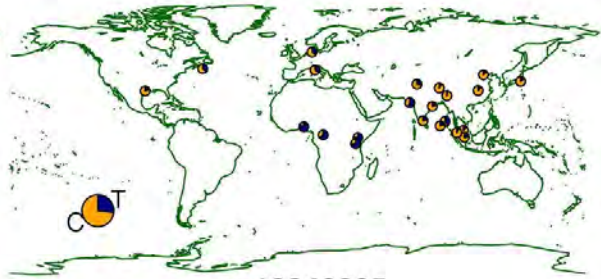

rs7958883

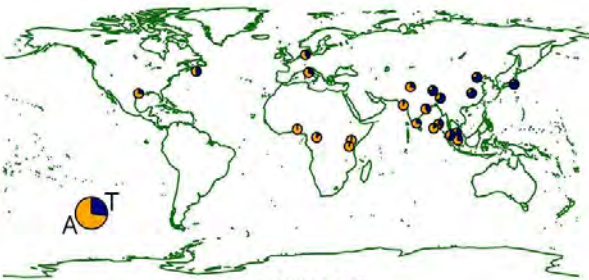

rs10848205

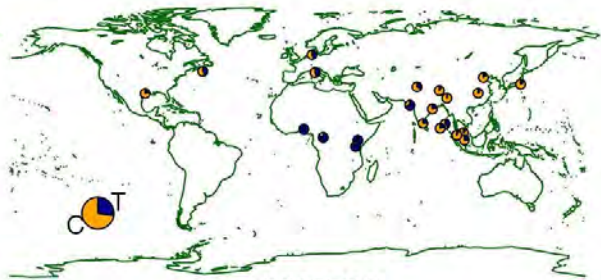

rs723188

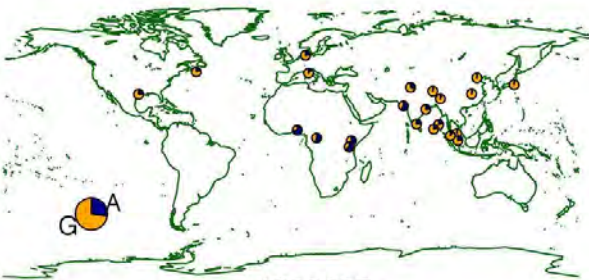

rs2037789

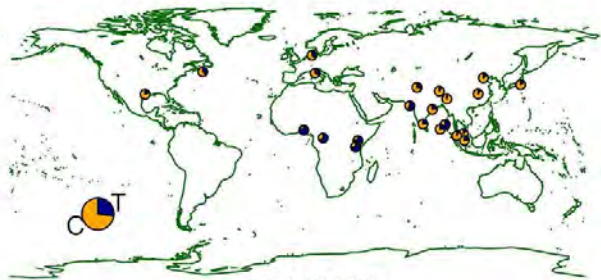

rs1800387

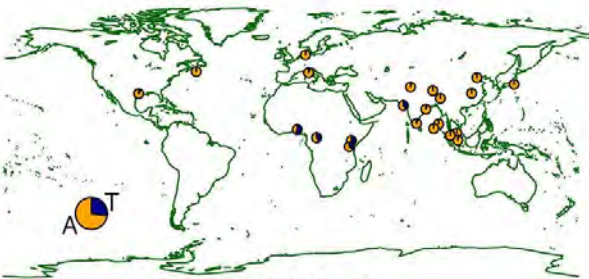

rs1106369

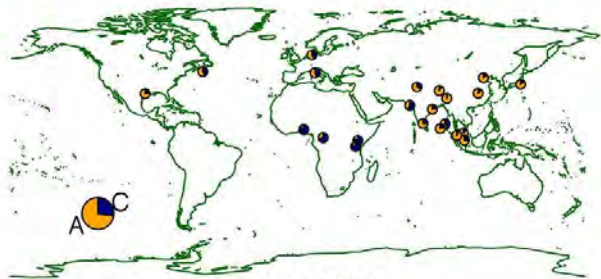

rs7975385

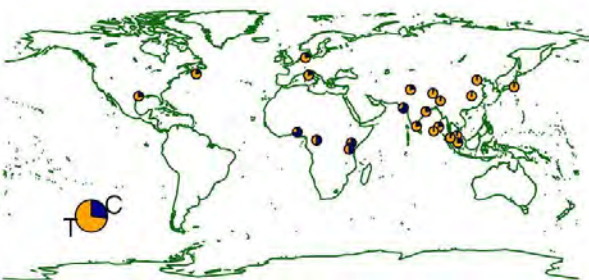

rs2001483

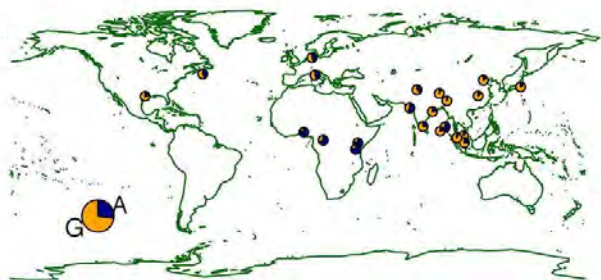

rs7981680

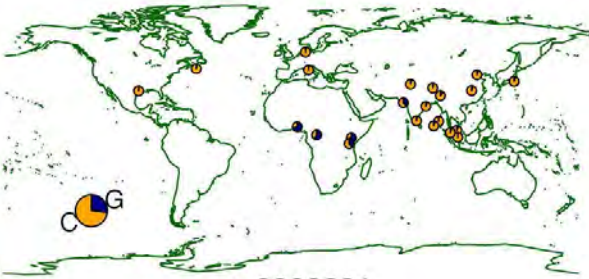

rs10148271

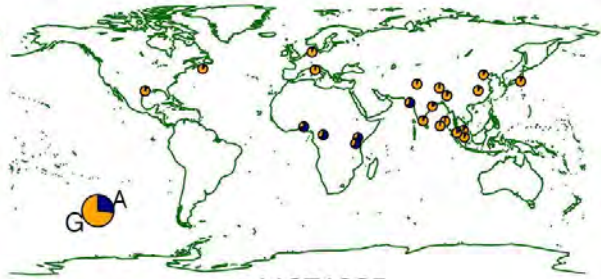

rs2093821

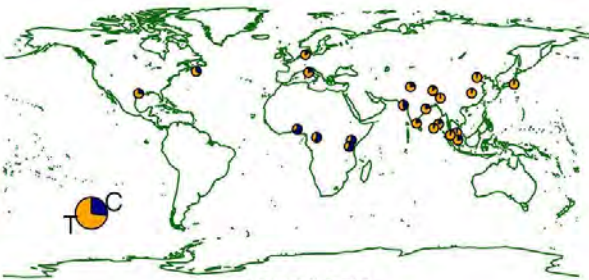

rs11071385

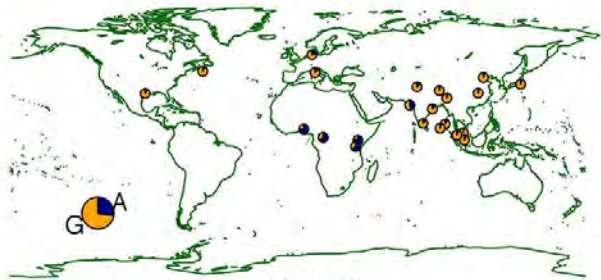

rs8006278

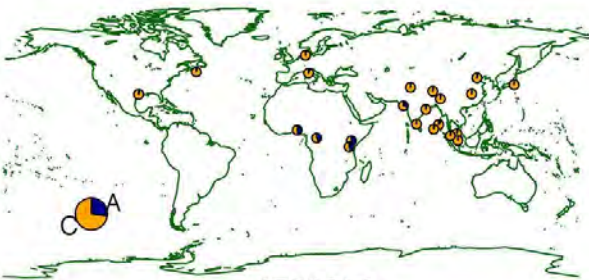

rs1025455

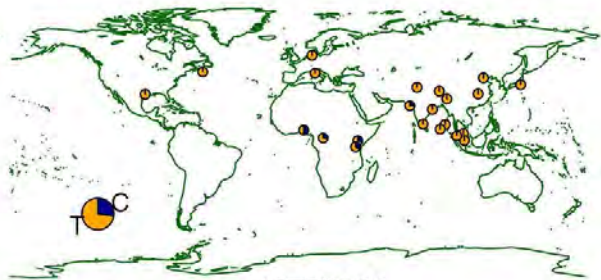

rs1536014

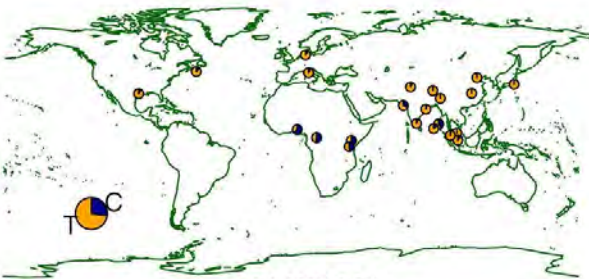

rs10775349

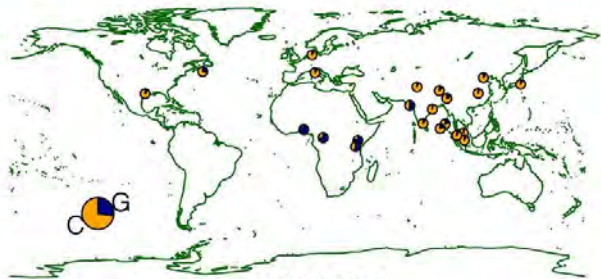

rs11158346

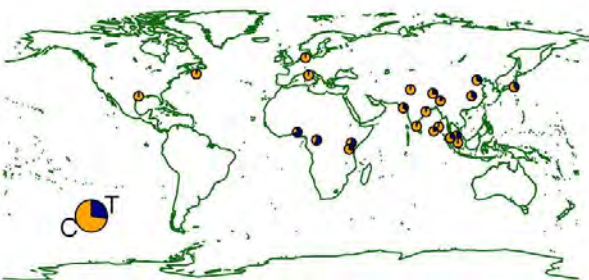

rs6500567

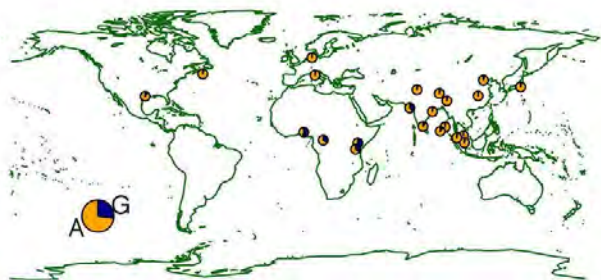



rs11150604

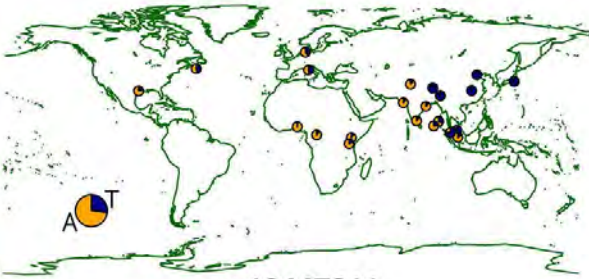

rs1058166

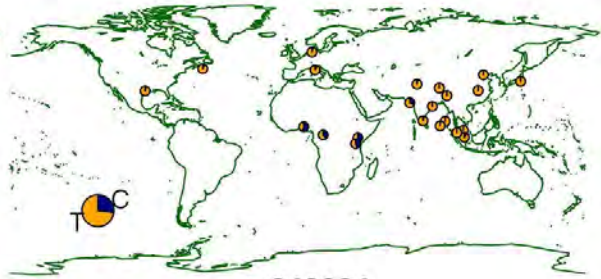

rs12447311

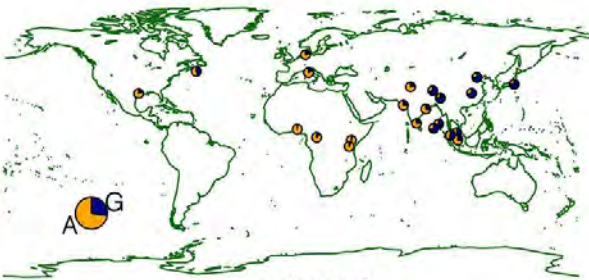

rs242924

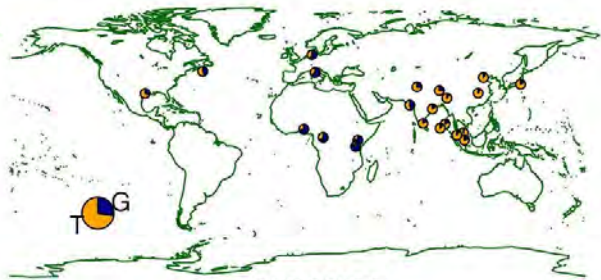

rs2168858

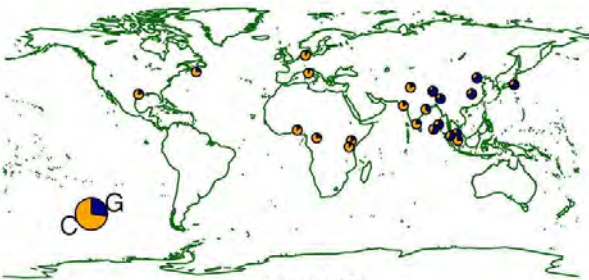

rs12944877

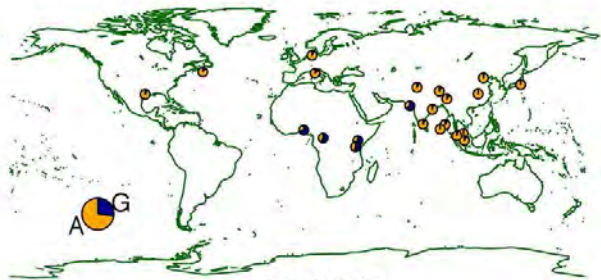

rs1133295

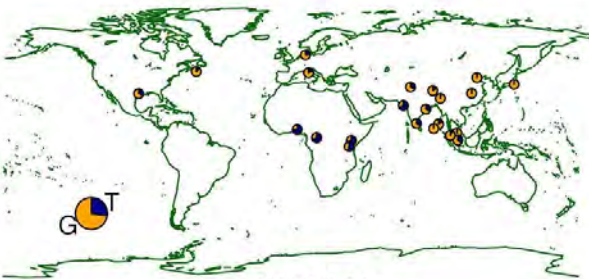

rs1533075

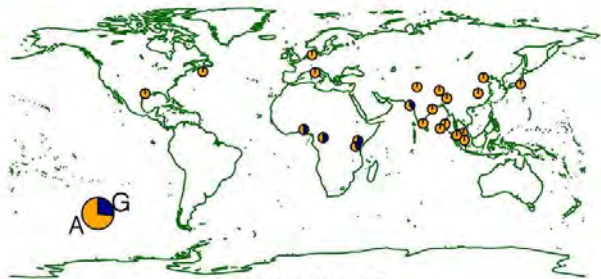

rs2159141

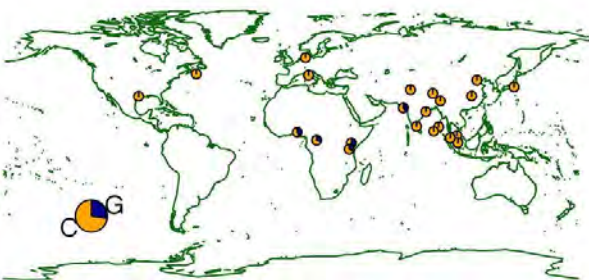

rs11656396

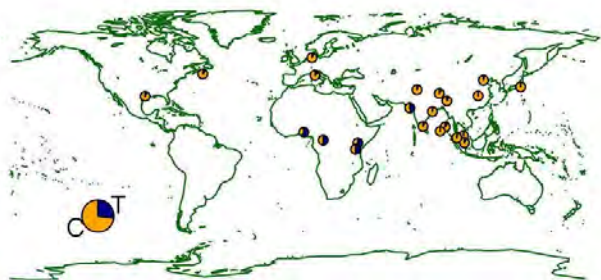

rs6501786

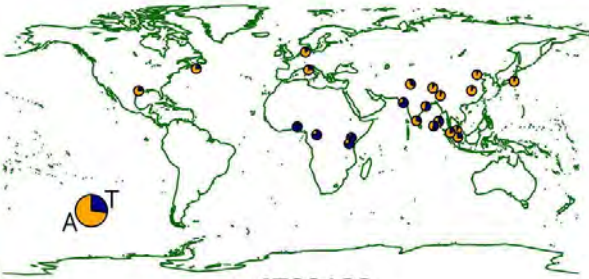

rs6086653

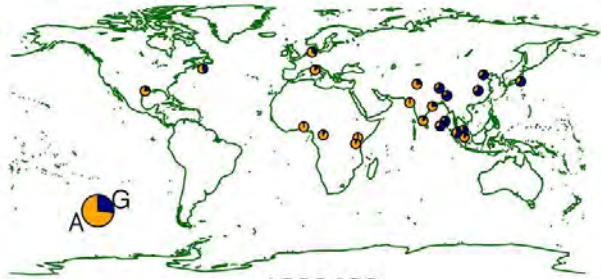

rs4789188

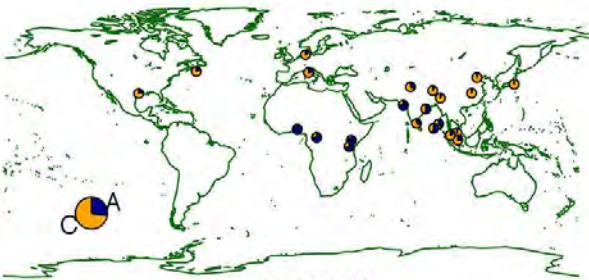

rs1883488

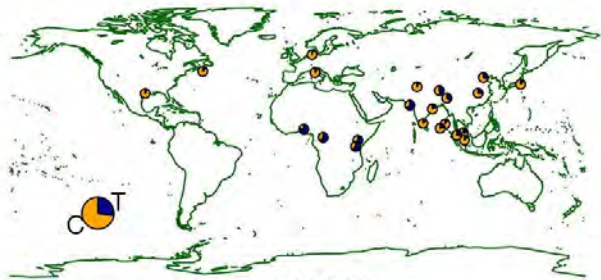

rs4789193

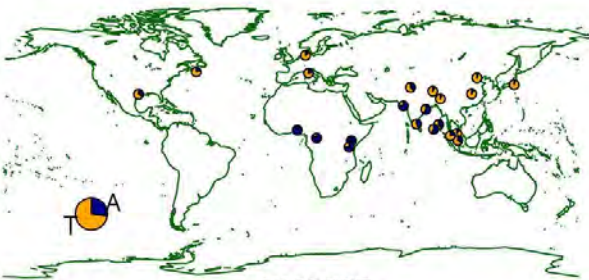

rs819147

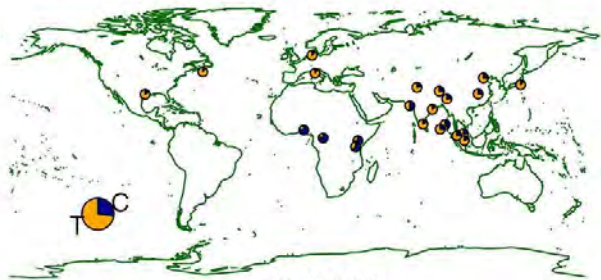

rs4640267

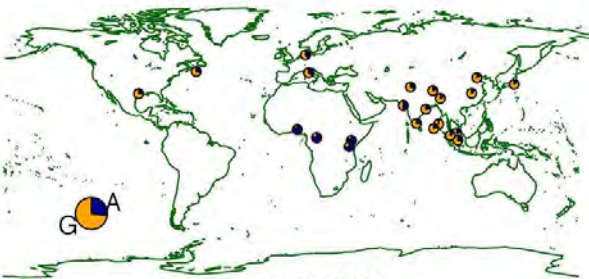

rs6017996

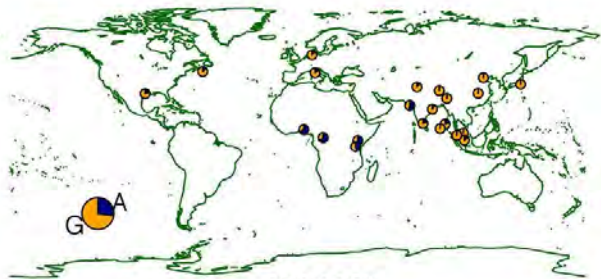

rs1787773

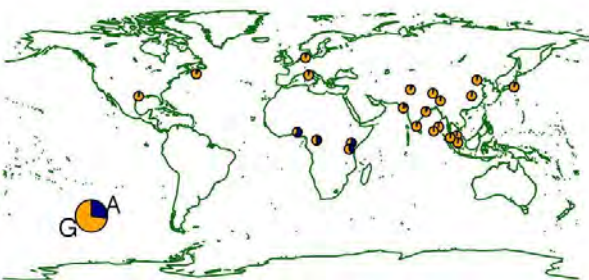

rs4812040

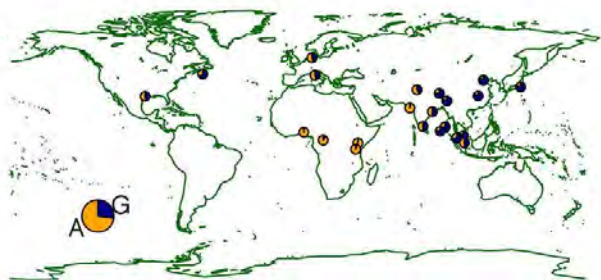

rs16980239

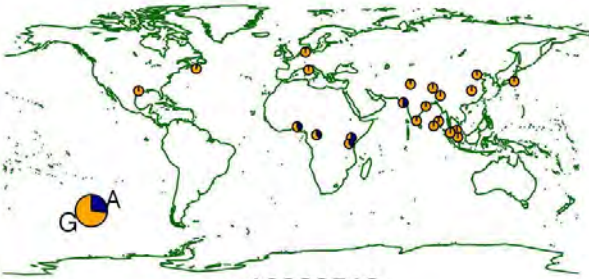

rs6001649

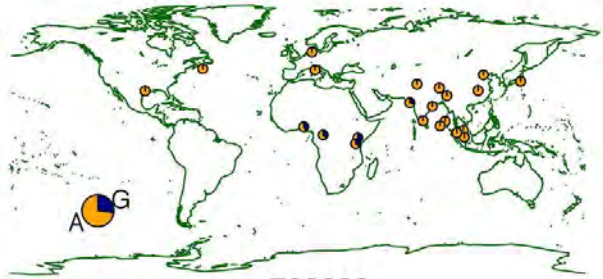

rs16980512

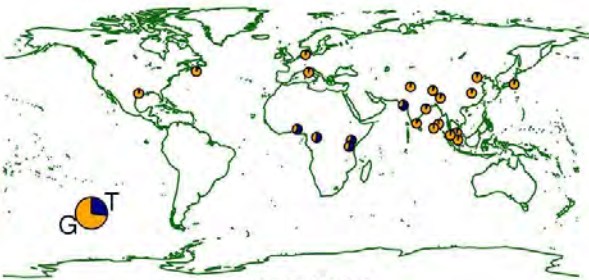

rs739092

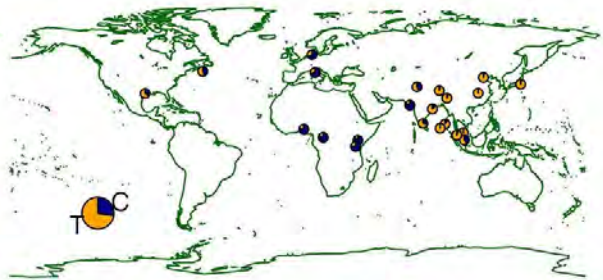

rs3730114

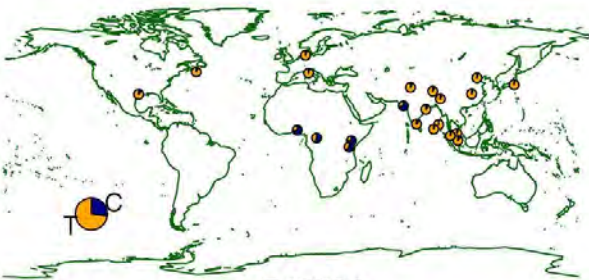

rs715534

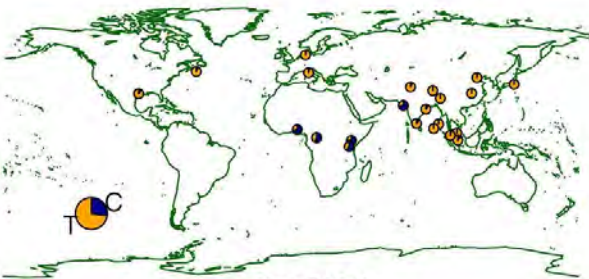

rs5750871

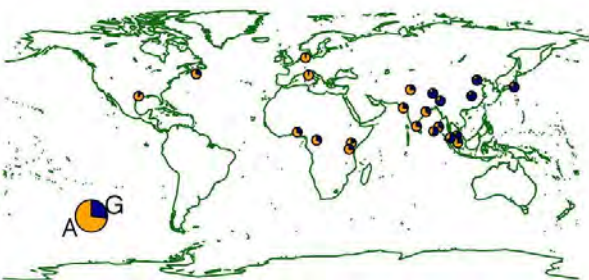

Figure S5: Quantitative trait association analysis of Hard-sweep signals

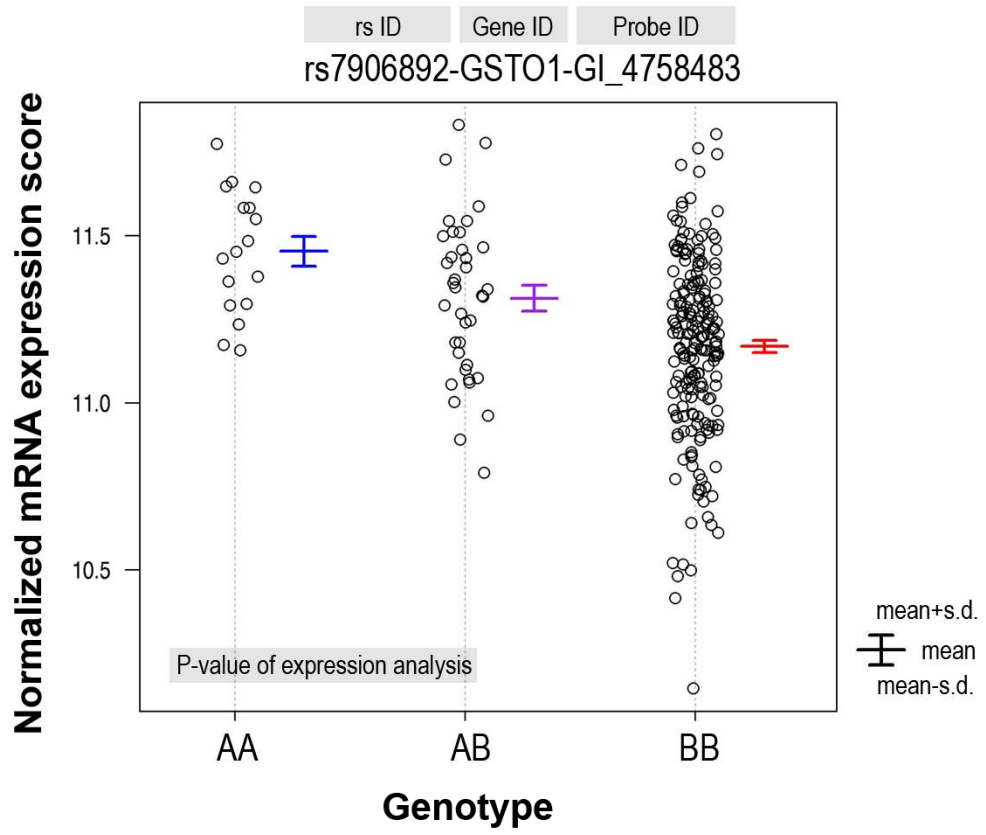

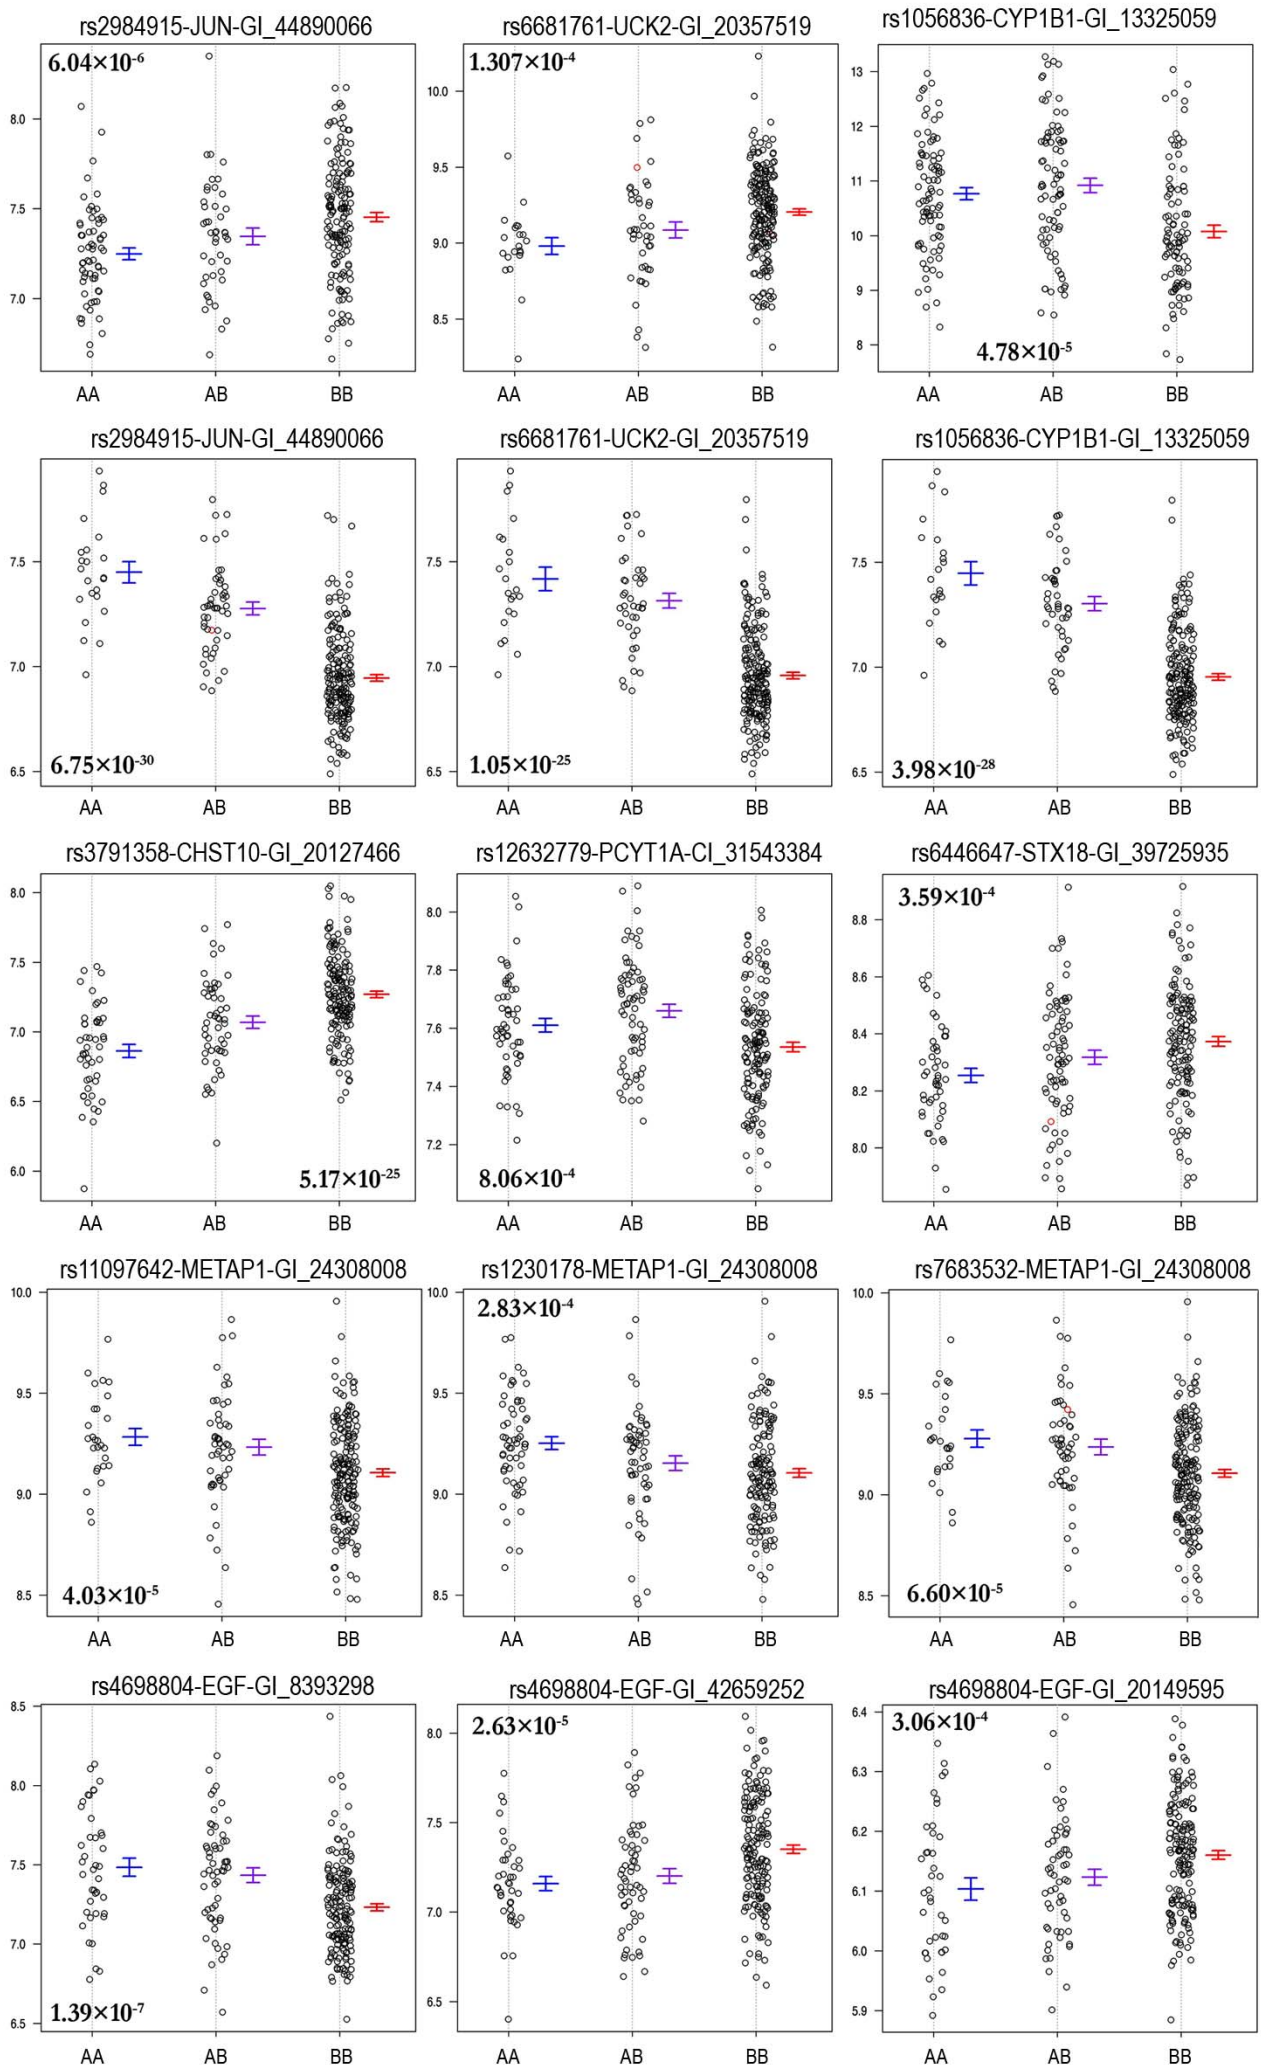

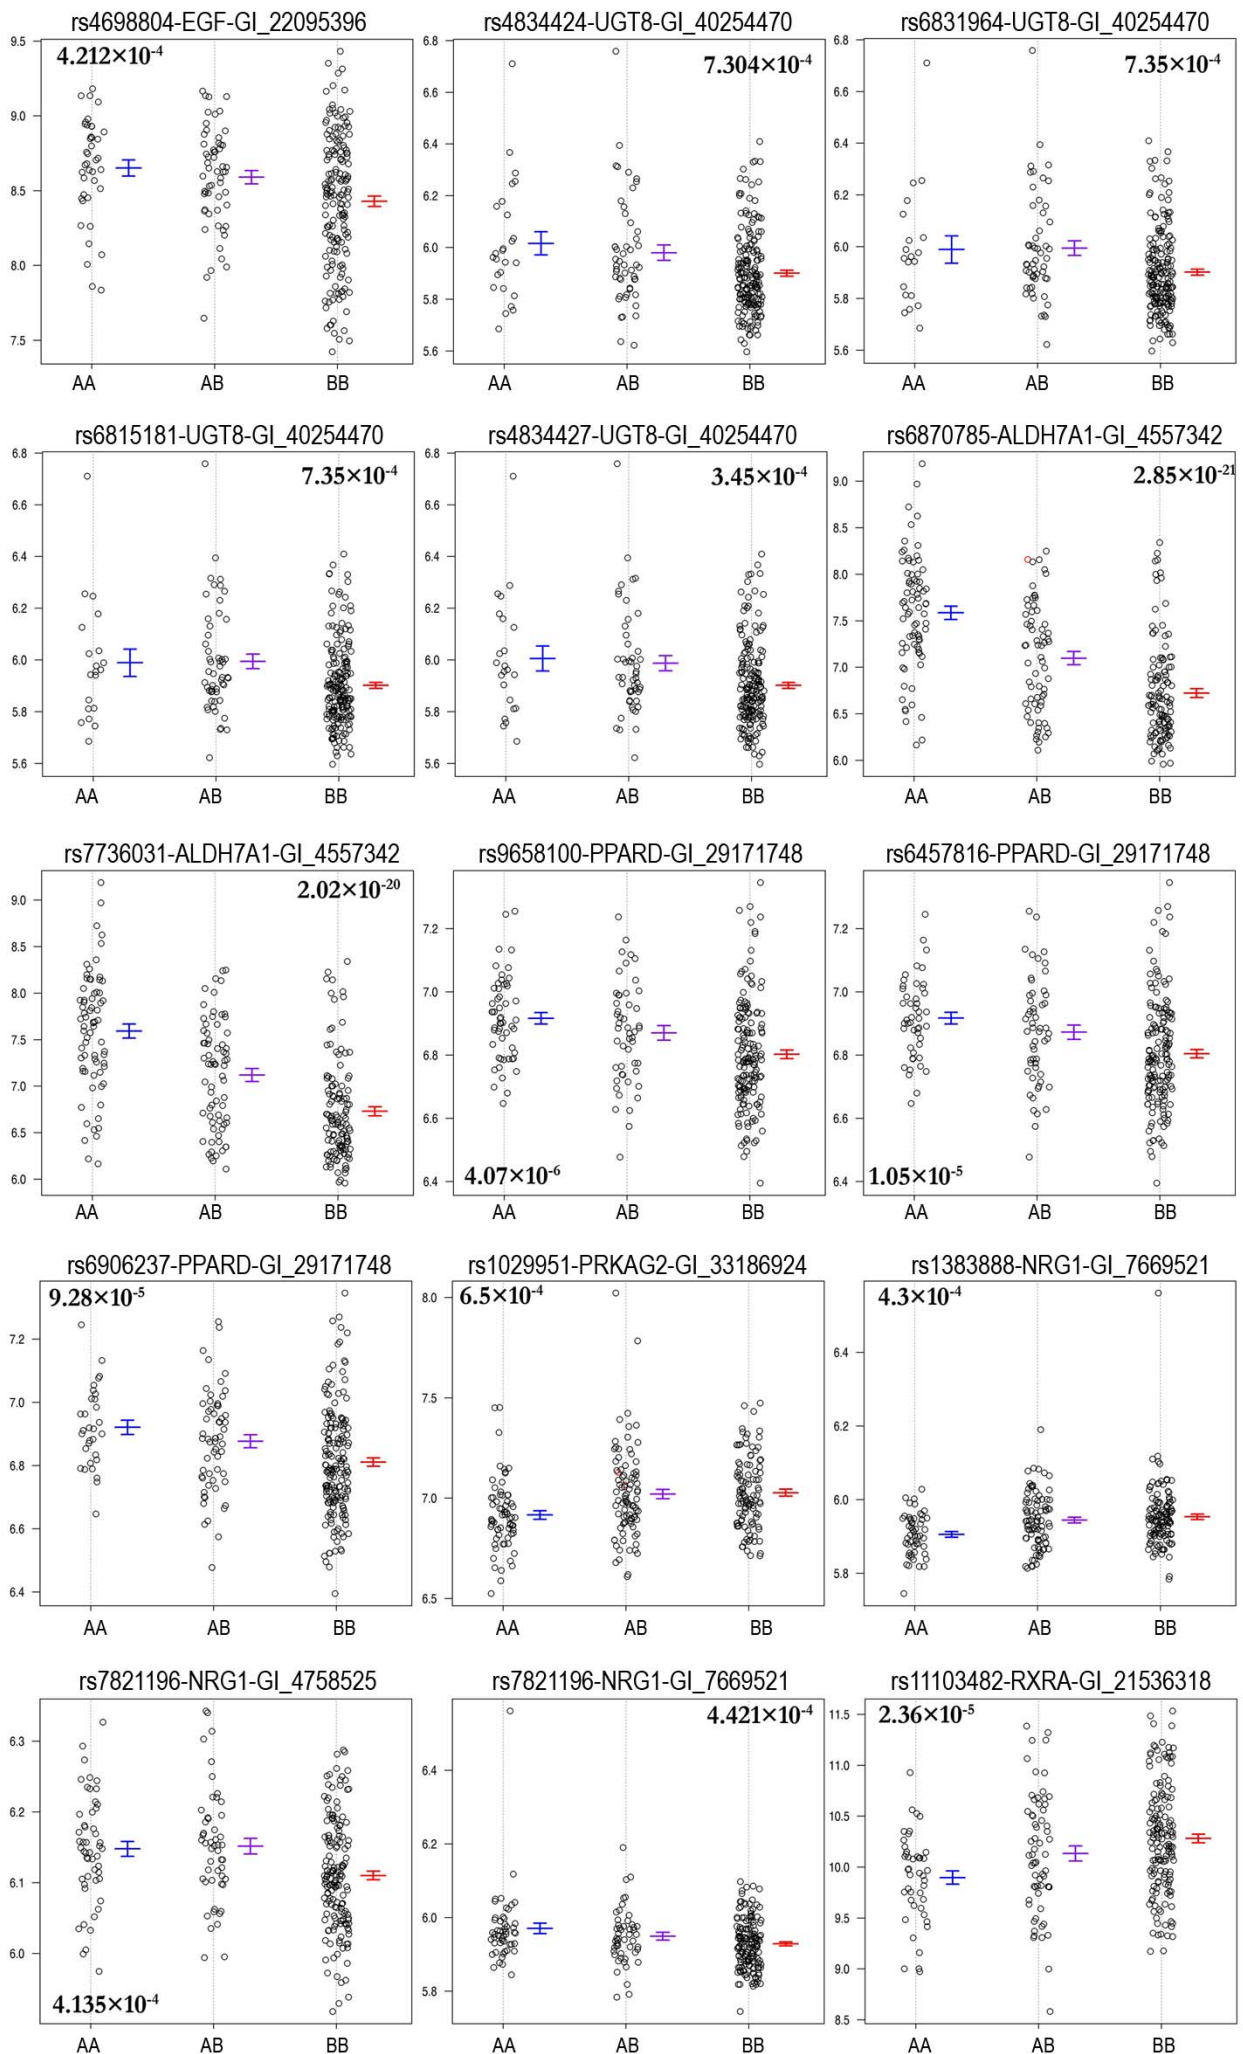

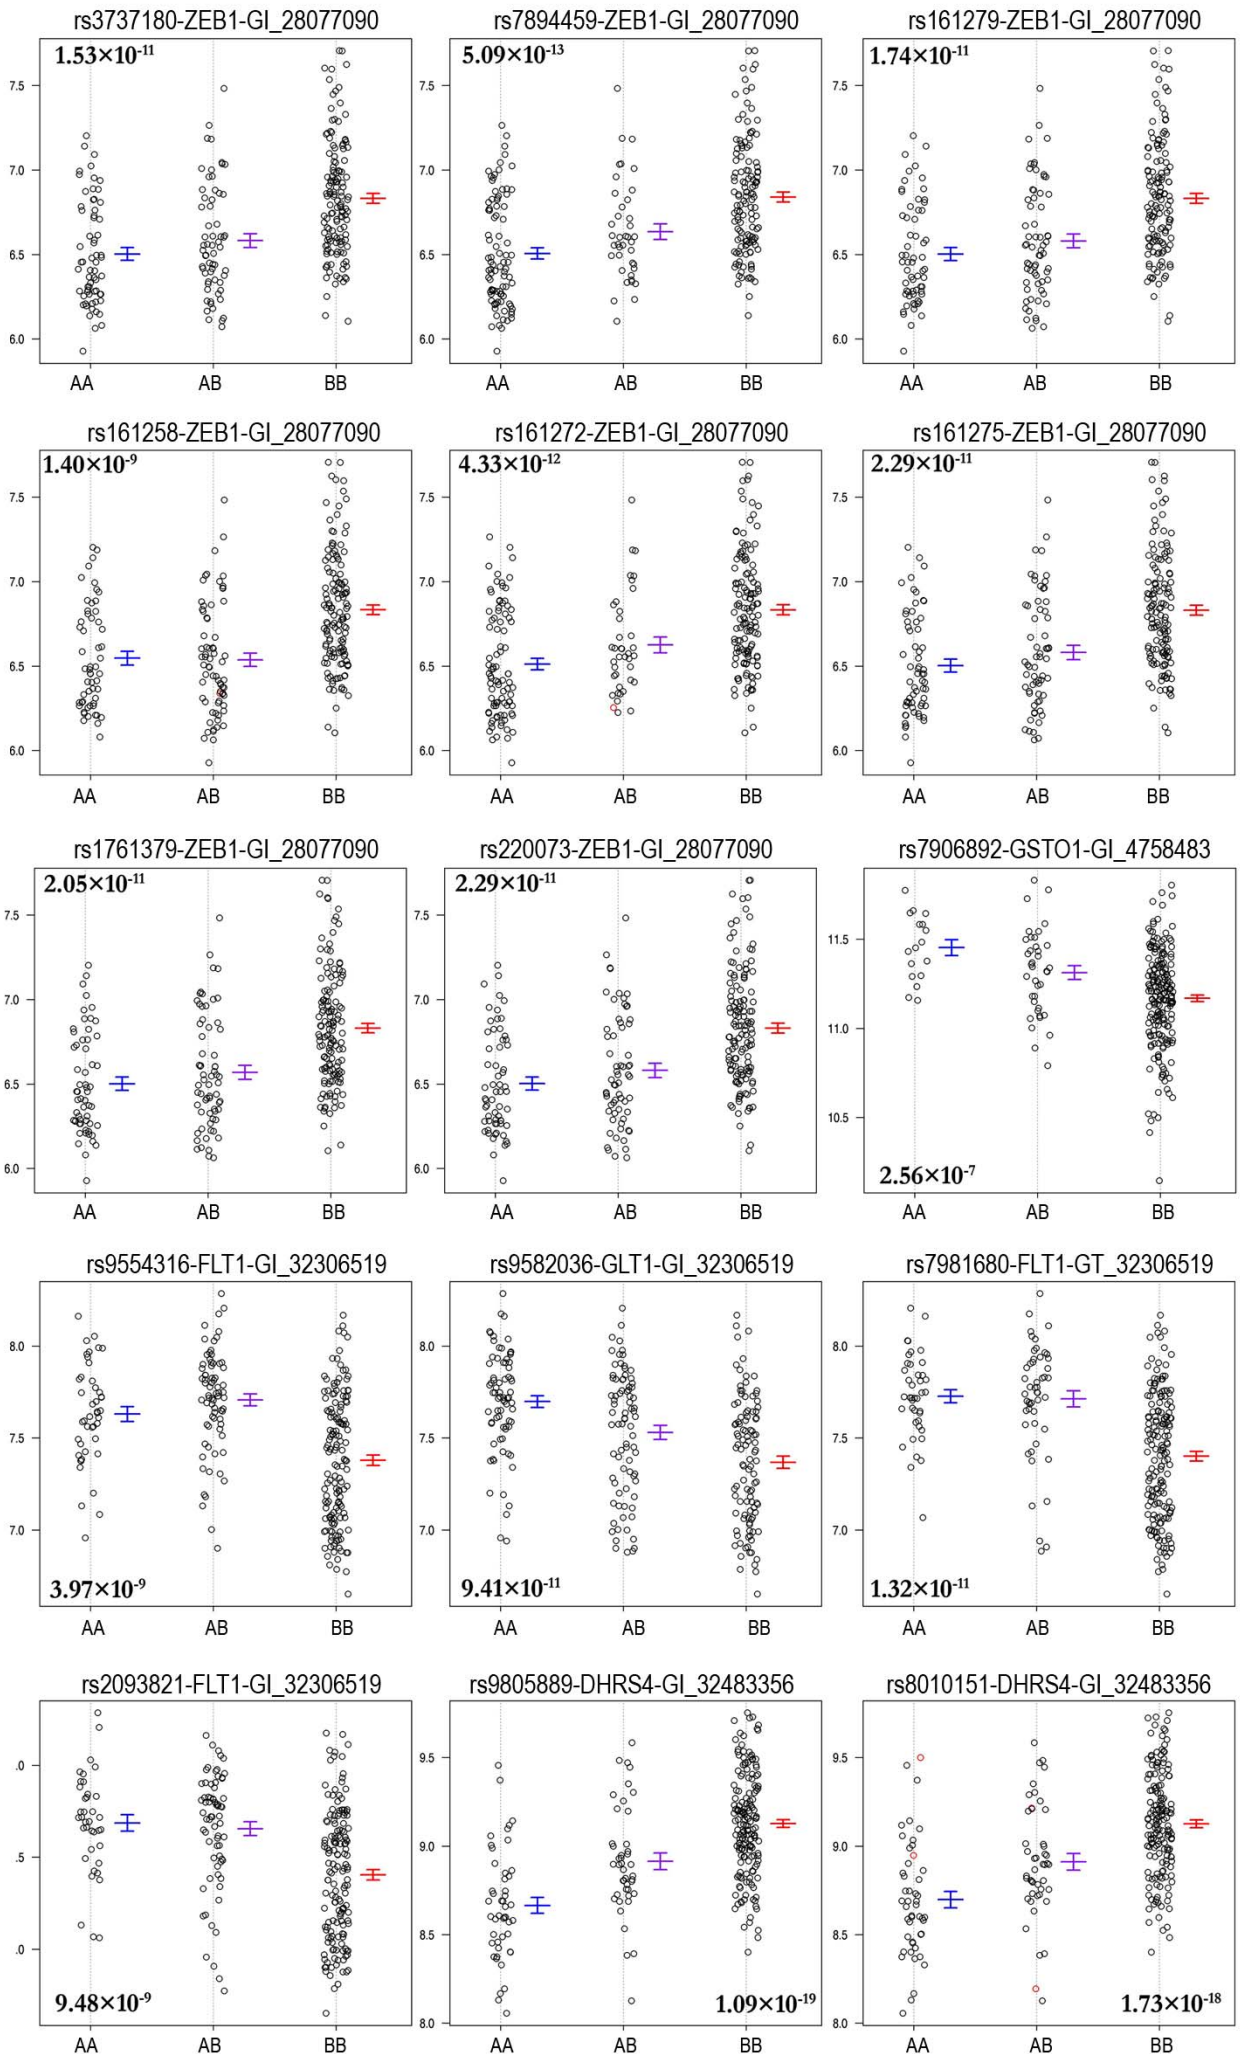

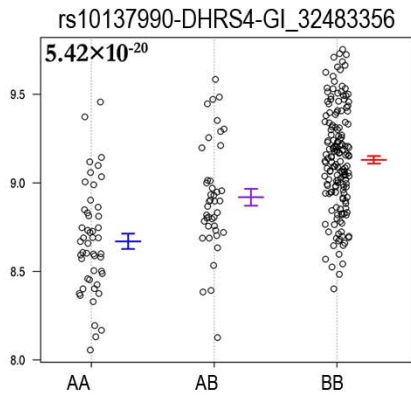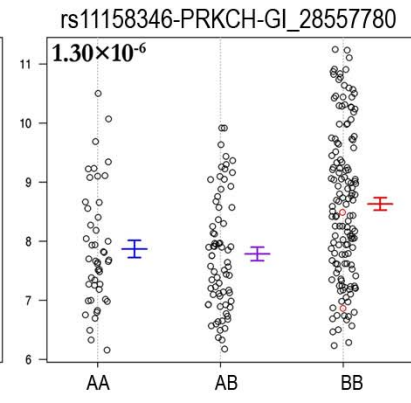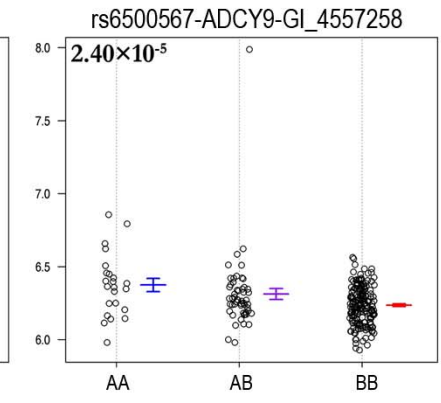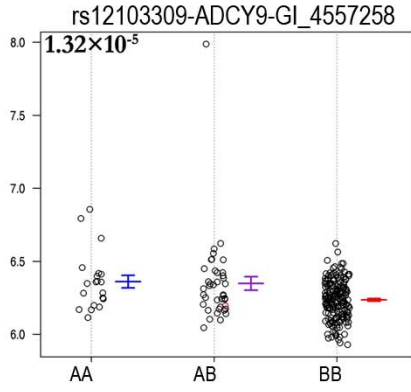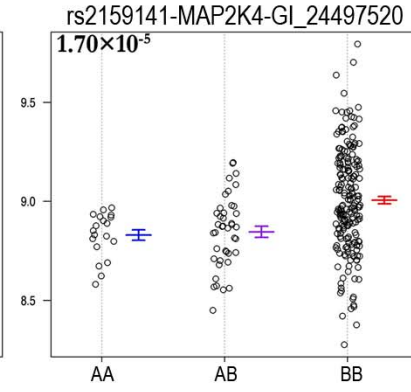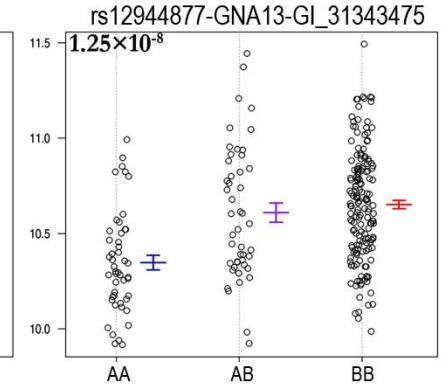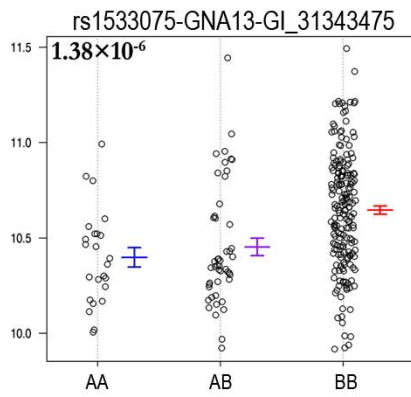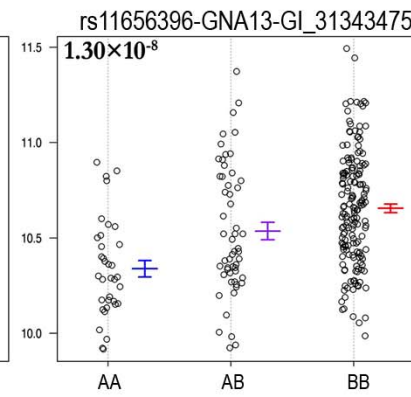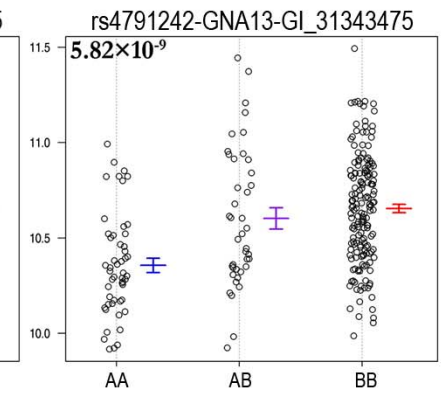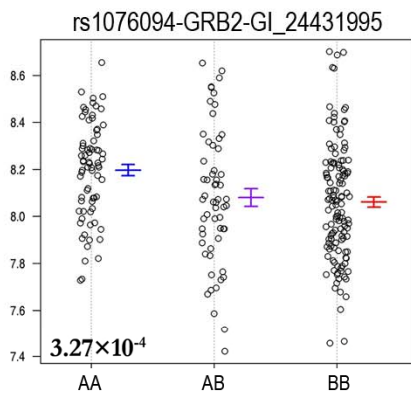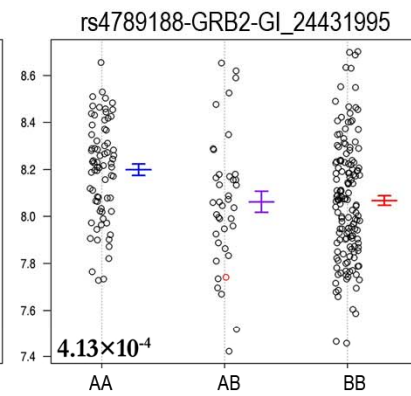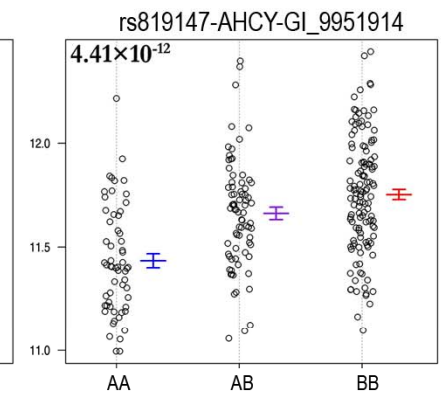



**Figure S6: Age of the variants and their respective std-z score**

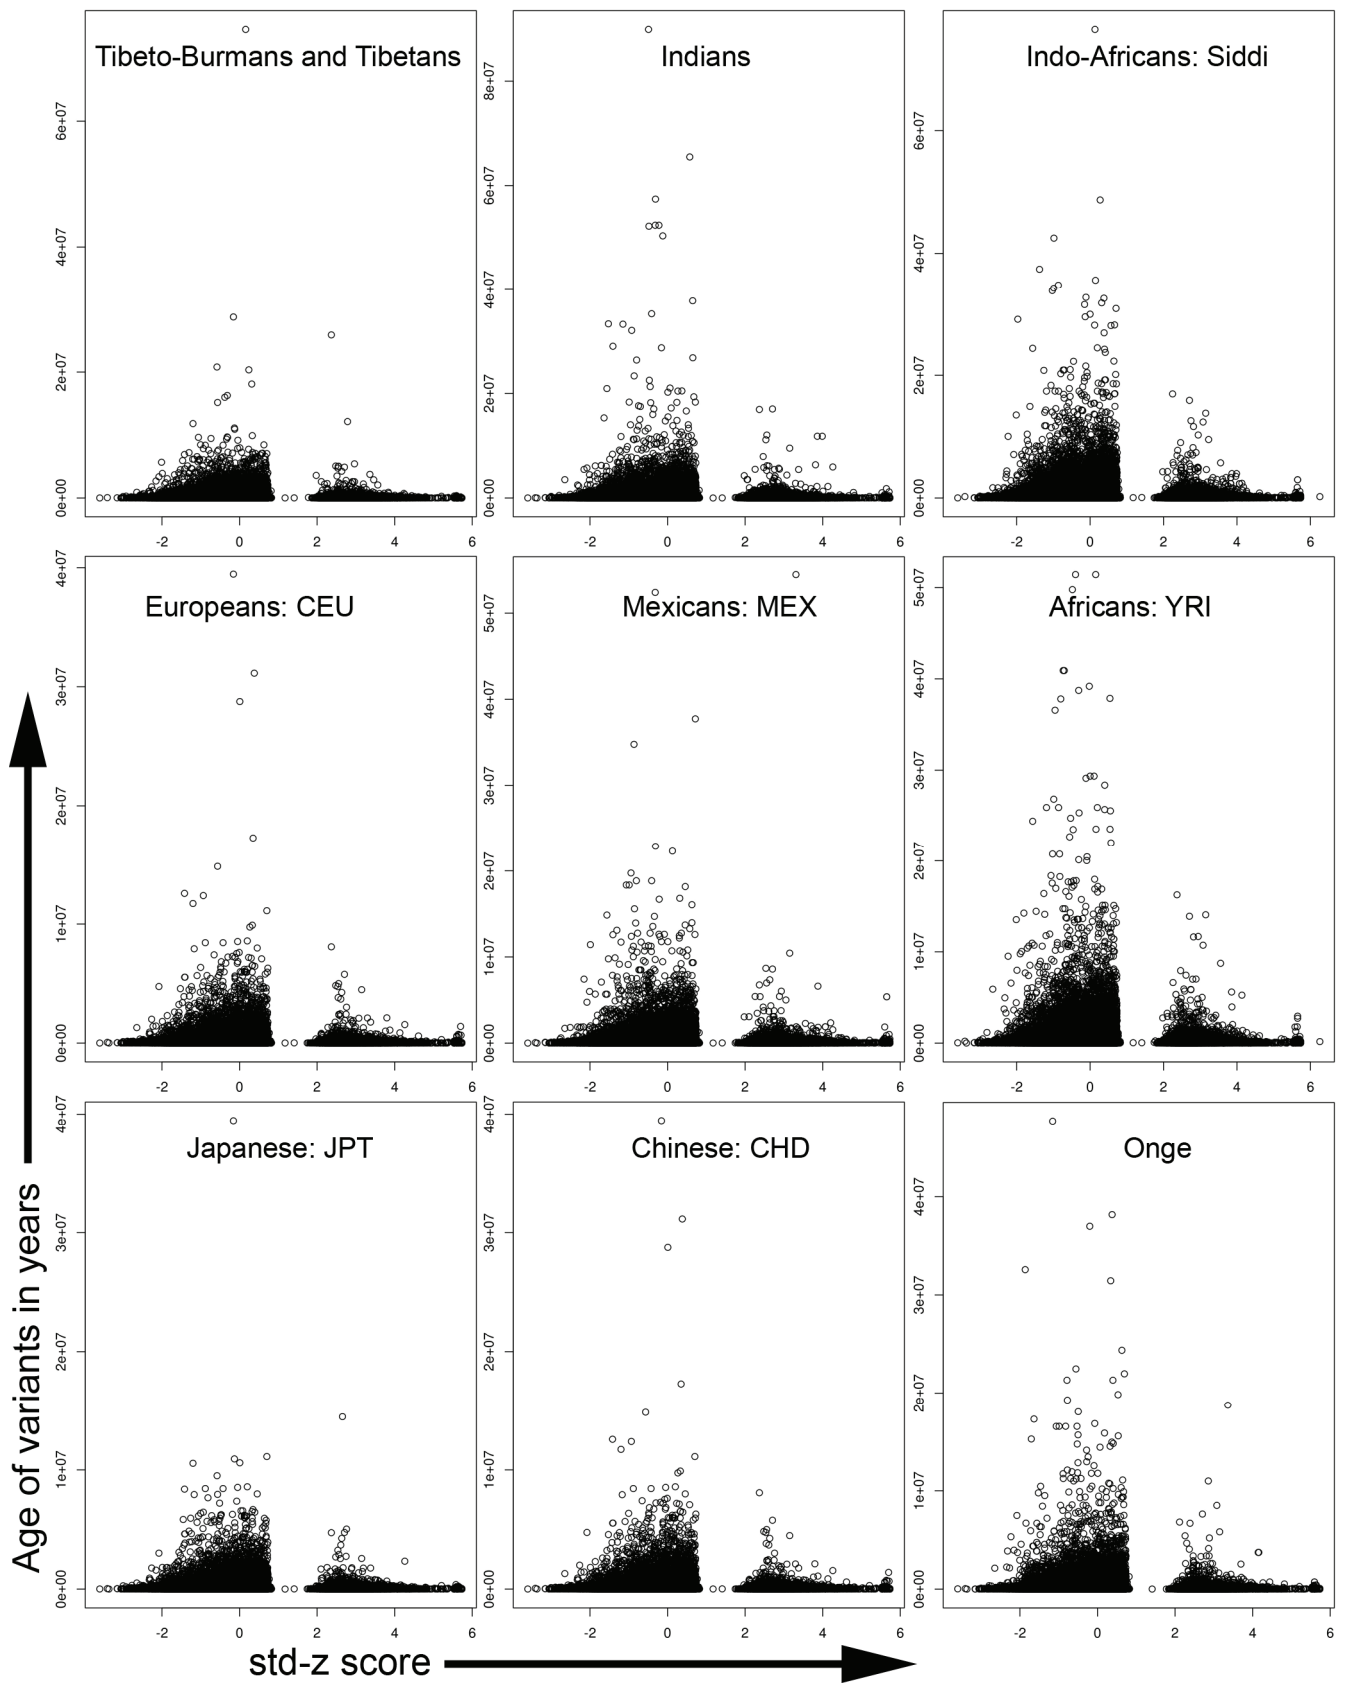

**Table S1:** Details of samples including source of data, number of individuals and their linguistic

| #  | Linguistic group | Caste               | No. of individuals | Source of the data (Reference) |
|----|------------------|---------------------|--------------------|--------------------------------|
| 1  | Austro-Asiatic   | Kharia              | 5                  | 1                              |
| 2  | Austro-Asiatic   | Ho                  | 5                  | 2                              |
| 3  | Austro-Asiatic   | Bhumij              | 5                  | 2                              |
| 4  | Austro-Asiatic   | Birhor              | 5                  | 2                              |
| 5  | Austro-Asiatic   | Korku               | 5                  | 2                              |
| 6  | Austro-Asiatic   | Munda               | 5                  | 2                              |
| 7  | Austro-Asiatic   | Gond UP             | 5                  | 2                              |
| 8  | Austro-Asiatic   | Gond chattisgarh    | 5                  | 2                              |
| 9  | Austro-Asiatic   | Gond MP             | 5                  | 2                              |
| 10 | Austro-Asiatic   | Santhal             | 5                  | 1                              |
| 11 | Dravidians       | Paniyan             | 5                  | 2                              |
| 12 | Dravidians       | Paliyar             | 5                  | 2                              |
| 13 | Dravidians       | Kattunayakan        | 5                  | 2                              |
| 14 | Dravidians       | Irula               | 5                  | 2                              |
| 15 | Dravidians       | Chenchu             | 7                  | 1                              |
| 16 | Dravidians       | Madiga              | 13                 | 1; 2                           |
| 17 | Dravidians       | Adi-dravidian       | 5                  | 2                              |
| 18 | Dravidians       | Mala                | 12                 | 1; 2                           |
| 19 | Dravidians       | Kurumba             | 11                 | 1                              |
| 20 | Dravidians       | Kamsali             | 5                  | 1                              |
| 21 | Dravidians       | Mini                | 5                  | 2                              |
| 22 | Dravidians       | Kalliyar            | 5                  | 2                              |
| 23 | Dravidians       | Vysya               | 15                 | 1; 2                           |
| 24 | Dravidians       | Malaikuravara       | 5                  | 2                              |
| 25 | Dravidians       | Naidu               | 4                  | 1                              |
| 26 | Dravidians       | Malli               | 5                  | 2                              |
| 27 | Dravidians       | Hallaki             | 3                  | 1                              |
| 28 | Dravidians       | Velama              | 3                  | 1                              |
| 29 | Dravidians       | Gounder             | 5                  | 2                              |
| 30 | Dravidians       | Narikuravar         | 5                  | 2                              |
| 31 | Dravidians       | Jews                | 5                  | 2                              |
| 32 | Dravidians       | Jain                | 5                  | 2                              |
| 33 | Indo-European    | Sahariya            | 3                  | 1                              |
| 34 | Indo-European    | Satnami             | 2                  | 1                              |
| 35 | Indo-European    | Bhil gujarat        | 11                 | 1; 2                           |
| 36 | Indo-European    | Tharu               | 4                  | 1                              |
| 37 | Indo-European    | Lodi                | 5                  | 1                              |
| 38 | Indo-European    | Bhil MP             | 5                  | 2                              |
| 39 | Indo-European    | Meghawal            | 4                  | 1                              |
| 40 | Indo-European    | Vaish               | 2                  | 1                              |
| 41 | Indo-European    | Kshatriya-rajasthan | 5                  | 2                              |
| 42 | Indo-European    | Kshatriya-UP        | 10                 | 2                              |
| 43 | Indo-European    | Brahmin             | 10                 | 2                              |
| 44 | Indo-European    | Kashmiri pandit     | 15                 | 1; 2                           |
| 45 | Tibeto-Burmans   | Aonaga              | 4                  | 1                              |
| 46 | Tibeto-Burmans   | Nyshi               | 3                  | 1                              |
| 47 | Tibeto-Burmans   | Sherpa              | 5                  | 2                              |
| 48 | Tibeto-Burmans   | Subba               | 5                  | 2                              |
| 49 | Tibetans         | Tibet refugees      | 5                  | 2                              |
| 50 | Onge-Jarawas     | Onge                | 10                 | 1                              |
| 51 | Andamanese       | Great-Andamanese    | 5                  | 1                              |
| 52 | Indo-African     | Siddi gujarat       | 10                 | 1; 2                           |
| 53 | Indo-African     | Siddi karnataka     | 4                  | 2                              |

|    |                   |                      |     |                                                                                                                                                                     |
|----|-------------------|----------------------|-----|---------------------------------------------------------------------------------------------------------------------------------------------------------------------|
| 54 | Indian-II (Admix) | Singapore indians    | 83  | <a href="http://www.statgen.nus.edu.sg/~SGVP/download.html">http://www.statgen.nus.edu.sg/~SGVP/download.html</a>                                                   |
| 55 | Malasians         | Singapore malaysians | 89  |                                                                                                                                                                     |
| 56 | East-Asians       | Singapore chinese    | 96  |                                                                                                                                                                     |
| 57 | Indian-I (Admix)  | HapMap-GIH           | 88  | <a href="ftp://ftp.ncbi.nlm.nih.gov/hapmap/genotypes/2009-01_phaseIII/plink_format/">ftp://ftp.ncbi.nlm.nih.gov/hapmap/genotypes/2009-01_phaseIII/plink_format/</a> |
| 58 | Africans          | HapMap-ASW           | 83  |                                                                                                                                                                     |
| 59 | Africans          | HapMap-LWK           | 90  |                                                                                                                                                                     |
| 60 | Africans          | HapMap-MKK           | 171 |                                                                                                                                                                     |
| 61 | Africans          | HapMap-YRI           | 167 |                                                                                                                                                                     |
| 62 | European          | HapMap-CEU           | 165 |                                                                                                                                                                     |
| 63 | European          | HapMap-TSI           | 88  |                                                                                                                                                                     |
| 64 | Mexicans          | HapMap-MEX           | 77  |                                                                                                                                                                     |
| 65 | East-Asians       | HapMap-CHB           | 84  |                                                                                                                                                                     |
| 66 | East-Asians       | HapMap-CHD           | 85  |                                                                                                                                                                     |
| 67 | East-Asians       | HapMap-JPT           | 86  |                                                                                                                                                                     |
| 68 | Tibetans          | NCBI-GEO             | 31  | GEO accession id: GSE21661                                                                                                                                          |

**Table S2:** Genome was divided into 20 bins (each 200,000 bps.) for standardization of z score. Corresponding number of SNPs, number of fragments and z-score distribution of bin were as given in the Table.

| Bin No. | No. of SNPs in fragment | No. of fragments | Median     | MAD/0.6745 |
|---------|-------------------------|------------------|------------|------------|
| 1       | 1                       | 766              | -0.5187431 | 1.068024   |
| 2       | 2-15                    | 744              | -0.3738015 | 1.474672   |
| 3       | 16-21                   | 758              | -0.4474863 | 1.177962   |
| 4       | 22-25                   | 659              | -0.4181137 | 1.207891   |
| 5       | 26-28                   | 630              | -0.4671298 | 1.057244   |
| 6       | 29-31                   | 644              | -0.4697439 | 1.024041   |
| 7       | 32-34                   | 702              | -0.499824  | 1.05804    |
| 8       | 35-37                   | 719              | -0.4781689 | 1.046683   |
| 9       | 38-40                   | 679              | -0.5069641 | 1.060324   |
| 10      | 41-43                   | 718              | -0.490797  | 1.056721   |
| 11      | 44-46                   | 713              | -0.5020221 | 1.049941   |
| 12      | 47-49                   | 647              | -0.5120172 | 1.03602    |
| 13      | 50-52                   | 642              | -0.5120757 | 1.061145   |
| 14      | 53-55                   | 609              | -0.5017832 | 1.048398   |
| 15      | 56-59                   | 745              | -0.510556  | 1.048406   |
| 16      | 30-63                   | 672              | -0.5236802 | 1.069389   |
| 17      | 64-68                   | 686              | -0.5323148 | 1.053699   |
| 18      | 69-75                   | 734              | -0.5434064 | 1.061268   |
| 19      | 76-87                   | 788              | -0.5432452 | 1.082833   |
| 20      | 88-169                  | 678              | -0.5625902 | 1.089479   |

**Table S3.** Distribution of std-z score in genic and non-genic regions with variation in flanking region

| <b>All genomic markers (623462 SNPs)</b> |                   |             |                       |             |                          |
|------------------------------------------|-------------------|-------------|-----------------------|-------------|--------------------------|
| Flanking region (bps)                    | Genic std-z score |             | Non-genic std-z score |             | Ratio of Genic/Non-genic |
|                                          | Median            | MAD./0.6745 | Median                | MAD./0.6745 | Median                   |
| 0                                        | 0.0046            | 0.9996      | -0.0031               | 0.9999      | -1.4785                  |
| 2000                                     | 0.0039            | 1.0004      | -0.0028               | 0.9992      | -1.3623                  |
| 5000                                     | 0.0038            | 1.0002      | -0.0031               | 0.9994      | -1.2117                  |
| 10000                                    | 0.0034            | 1           | -0.0033               | 0.9997      | -1.032                   |
| 20000                                    | 0.0031            | 1.0005      | -0.0037               | 0.9992      | -0.8323                  |
| 50000                                    | 0.0025            | 0.9992      | -0.0046               | 1.0012      | -0.54                    |
| 100000                                   | 0.0018            | 0.9988      | -0.0049               | 1.0028      | -0.3702                  |

**Table S4.**Central tendency and statistical dispersion of std-z score in different categories

| <b>Category</b>     | <b>Median</b> | <b>M.A.D./0.6745</b> |
|---------------------|---------------|----------------------|
| Transporter         | -0.0859228    | 0.989056             |
| Core                | -0.0103867    | 0.9024186            |
| Extended            | -0.0184088    | 0.9981437            |
| PhaseI              | 0.0066892     | 0.9578569            |
| PhaseII             | 0.04865       | 1.005386             |
| Modifier            | 0.0331328     | 0.9534738            |
| All Pathway genes   | 0.0048129     | 0.9915011            |
| Other Pathway genes | 0.0036548     | 0.9985724            |
| All Pharma genes    | -0.0172291    | 0.9903678            |

**Table S5.** Number of SNPs having std-z score > 3 and their corresponding percentage in different categories

| Category            | Total genes | Total genes after filtering | Number of genes having std-z score >3 (percentage) |
|---------------------|-------------|-----------------------------|----------------------------------------------------|
| Core                | 32          | 26                          | 3 (11.54)                                          |
| Extended            | 257         | 236                         | 44 (18.64)                                         |
| Transporter         | 76          | 72                          | 15 (20.83)                                         |
| Phase-I             | 123         | 114                         | 20 (17.54)                                         |
| Phase-II            | 66          | 54                          | 6 (11.11)                                          |
| <b>Modifier</b>     | <b>24</b>   | <b>22</b>                   | <b>6 (27.27)</b>                                   |
| Other pathway genes | 688         | 611                         | 100 (16.37)                                        |

**Table S6.** PharmGKB pathways, which are excluded due to less number of genes

| <b>Pathway</b>                                                | <b># of genes</b> |
|---------------------------------------------------------------|-------------------|
| Fluoropyrimidine Pathway Pharmacodynamic                      | 1                 |
| Amodiaquine Pathway Pharmacokinetics                          | 3                 |
| Anti diabetic Drug Nateglinide Pathway Pharmacokinetics       | 3                 |
| Anti diabetic Drug Repaglinide Pathway Pharmacokinetics       | 3                 |
| Aromatase Inhibitor Pathway Breast Cell Pharmacodynamics      | 3                 |
| Aromatase Inhibitor Pathway Multiple Tissues Pharmacodynamics | 3                 |
| Citalopram Pathway Pharmacokinetics                           | 3                 |
| Clomipramine Pathway Pharmacokinetics                         | 3                 |
| Imipramine Desipramine Pathway Pharmacokinetics               | 3                 |
| Methylene Blue Pathway Pharmacodynamics                       | 3                 |
| Proton Pump Inhibitor Pathway Pharmacokinetics                | 3                 |
| Rosiglitazone Pharmacokinetic Pathway                         | 3                 |
| Tacrolimus Cyclosporine Pathway Pharmacokinetics              | 3                 |
| Uric Acid Lowering Drugs Pathway Pharmacodynamics             | 3                 |
| Celecoxib Pathway Pharmacokinetics                            | 4                 |
| Doxepin Pathway Pharmacokinetics                              | 4                 |
| Fluoxetine Pathway Pharmacokinetics                           | 4                 |
| Nicotine Pathway Chromaffin Cell Pharmacodynamics             | 4                 |
| Pentose Phosphate Pathway Erythrocyte                         | 4                 |
| Platinum Pathway Pharmacokinetics Pharmacodynamics            | 4                 |
| Rosuvastatin Pathway Pharmacokinetics                         | 4                 |
| Theophylline Pathway Pharmacokinetics                         | 4                 |
| Venlafaxine Pathway Pharmacokinetics                          | 4                 |
| Artemisinin and Derivatives Pathway Pharmacokinetics          | 5                 |
| Glucocorticoid Pathway HPA Axis Pharmacodynamics              | 5                 |
| Losartan Pathway Pharmacokinetics                             | 5                 |
| Nevirapine Pathway Pharmacokinetics                           | 5                 |
| Oxidative Stress Regulatory Pathway Erythrocyte               | 5                 |
| Cyclophosphamide Pathway Pharmacokinetics                     | 6                 |
| Ifosfamide Pathway Pharmacokinetics                           | 6                 |
| Leukotriene modifiers pathway Pharmacodynamics                | 6                 |
| Metformin Pathway Pharmacokinetics                            | 6                 |
| Sorafenib Pharmacokinetics                                    | 6                 |
| Tramadol Pharmacokinetics                                     | 6                 |
| Caffeine Pathway Pharmacokinetics                             | 7                 |
| Gefitinib Pathway Pharmacokinetics                            | 7                 |
| Methotrexate Pathway Brain Cell Pharmacokinetics              | 7                 |
| Codeine and Morphine Pathway Pharmacokinetics                 | 8                 |
| Estrogen Metabolism Pathway                                   | 8                 |
| Nicotine Pathway Pharmacokinetics                             | 8                 |
| TenofovirAdefovir Pathway Pharmacokinetics                    | 8                 |
| Warfarin Pathway Pharmacokinetics                             | 8                 |
| Benzodiazepine Pathway Pharmacokinetics                       | 9                 |
| Erlotinib Pathway Pharmacokinetics                            | 9                 |
| Pravastatin Pathway Pharmacokinetics                          | 9                 |



**Table S7.** Statistical significance of different pathways.

|          | Pathway                                                             | Total Genes | Hump1 (11399: 0.6869)   | Hump2 (5031: 0.3032)    | Hump3 (164: 0.0099)    | chisq: p-value    | q value            |
|----------|---------------------------------------------------------------------|-------------|-------------------------|-------------------------|------------------------|-------------------|--------------------|
| <b>1</b> | <b>Taxane Pathway Pharmacokinetics</b>                              | <b>10</b>   | <b>3 (0.3)</b>          | <b>5 (0.5)</b>          | <b>2 (0.2)</b>         | <b>2.53×10-09</b> | <b>1.28×10-07</b>  |
| <b>2</b> | <b>Fluvastatin Pathway Pharmacokinetics</b>                         | <b>12</b>   | <b>8 (0.666666667)</b>  | <b>2 (0.166666667)</b>  | <b>2 (0.166666667)</b> | <b>2.73×10-07</b> | <b>6.91×10-06</b>  |
| <b>3</b> | <b>Atorvastatin-Lovastatin-Simvastatin Pathway Pharmacokinetics</b> | <b>13</b>   | <b>9 (0.692307692)</b>  | <b>2 (0.153846154)</b>  | <b>2 (0.153846154)</b> | <b>8.79×10-07</b> | <b>1.48×10-05</b>  |
| <b>4</b> | <b>Ibuprofen Pathway Pharmacokinetics</b>                           | <b>16</b>   | <b>11 (0.6875)</b>      | <b>3 (0.1875)</b>       | <b>2 (0.125)</b>       | <b>1.76×10-05</b> | <b>0.000222609</b> |
| <b>5</b> | <b>Statin Pathway Generalized Pharmacokinetics</b>                  | <b>19</b>   | <b>10 (0.526315789)</b> | <b>7 (0.368421053)</b>  | <b>2 (0.105263158)</b> | <b>0.0001085</b>  | <b>0.001097864</b> |
| <b>6</b> | <b>β-agonist/β-blocker Pathway Pharmacodynamics</b>                 | <b>58</b>   | <b>26 (0.448275862)</b> | <b>31 (0.534482759)</b> | <b>1 (0.017241379)</b> | <b>0.0004794</b>  | <b>0.004042367</b> |
| <b>7</b> | <b>Zidovudine Pathway Pharmacokinetics &amp; Pharmacodynamics</b>   | <b>17</b>   | <b>5 (0.294117647)</b>  | <b>11 (0.647058824)</b> | <b>1 (0.058823529)</b> | <b>0.0007003</b>  | <b>0.005061452</b> |
| 8        | Sympathetic-Nerve Pathway Pre & Post Ganglionic Junction            | 10          | 2 (0.2)                 | 8 (0.8)                 | 0 (0)                  | 0.002911          | 0.01840947         |
| 9        | Proton Pump Inhibitor Pathway Pharmacodynamics                      | 45          | 21 (0.466666667)        | 24 (0.533333333)        | 0 (0)                  | 0.003276          | 0.01841579         |
| 10       | Celecoxib Pathway Pharmacodynamics                                  | 54          | 27 (0.5)                | 27 (0.5)                | 0 (0)                  | 0.006292          | 0.03183301         |
| 11       | EGFR Inhibitor Pathway Pharmacodynamics                             | 62          | 32 (0.52)               | 30 (0.48)               | 0 (0)                  | 0.007171          | 0.03298031         |
| 12       | Imatinib Pathway Pharmacokinetics Pharmacodynamics                  | 10          | 5 (0.5)                 | 4 (0.4)                 | 1 (0.1)                | 0.01119           | 0.05146671         |
| 13       | Vinka Alkaloid Pathway Pharmacokinetics                             | 10          | 6 (0.6)                 | 3 (0.3)                 | 1 (0.1)                | 0.01594           | 0.0620346          |
| 14       | Clopidogrel Pathway Pharmacokinetics                                | 10          | 6 (0.6)                 | 3 (0.3)                 | 1 (0.1)                | 0.01594           | 0.0620346          |
| 15       | Mycophenolicacid Pathway PharmacokineticsP harmacodynamics          | 12          | 9 (0.75)                | 2 (0.166666667)         | 1 (0.083333333)        | 0.02576           | 0.09309081         |
| 16       | Irinotecan Pathway Pharmacokinetics                                 | 13          | 7 (0.538461538)         | 5 (0.384615385)         | 1 (0.076923077)        | 0.03731           | 0.1228141          |
| 17       | Tamoxifen Pathway Pharmacokinetics                                  | 16          | 13 (0.8125)             | 2 (0.125)               | 1 (0.0625)             | 0.03884           | 0.1228141          |
| 18       | Methotrexate Pathway Pharmacokinetics                               | 13          | 8 (0.615384615)         | 4 (0.307692308)         | 1 (0.076923077)        | 0.05045           | 0.1501417          |
| 19       | Etoposide Pathway Pharmacokinetics Pharmacodynamics                 | 14          | 8 (0.571428571)         | 5 (0.357142857)         | 1 (0.071428571)        | 0.05672           | 0.1594236          |
| 20       | Phenytoin Pathway Pharmacokinetics                                  | 16          | 12 (0.75)               | 3 (0.1875)              | 1 (0.0625)             | 0.07232           | 0.1925723          |
| 21       | Carbamazepine Pathway Pharmacokinetics                              | 16          | 9 (0.5625)              | 6 (0.375)               | 1 (0.0625)             | 0.07859           | 0.1988045          |
| 22       | Valproic Acid Pathway Pharmacodynamics                              | 14          | 6 (0.428571429)         | 8 (0.571428571)         | 0 (0)                  | 0.09002           | 0.2168746          |
| 23       | Vemurafenib Pathway Pharmacodynamics                                | 22          | 11 (0.5)                | 11 (0.5)                | 0 (0)                  | 0.1262            | 0.2902189          |
| 24       | Sorafenib Pharmacodynamics                                          | 25          | 13 (0.52)               | 12 (0.48)               | 0 (0)                  | 0.1472            | 0.3237941          |
| 25       | Acetaminophen Pathway Pharmacokinetics                              | 19          | 12 (0.631578947)        | 6 (0.315789474)         | 1 (0.052631579)        | 0.1664            | 0.3397815          |
| 26       | VEGFSignaling Pathway                                               | 56          | 32 (0.571428571)        | 23 (0.410714286)        | 1 (0.017857143)        | 0.1679            | 0.3397815          |
| 27       | Lamivudine Pathway Pharmacokinetics/Pharmacodynamics                | 16          | 8 (0.5)                 | 8 (0.5)                 | 0 (0)                  | 0.2217            | 0.4314012          |
| 28       | Cyclophosphamide Pathway Pharmacodynamics                           | 14          | 7 (0.5)                 | 7 (0.5)                 | 0 (0)                  | 0.2676            | 0.5014312          |
| 29       | Diuretics Pathway Pharmacodynamics                                  | 26          | 16 (0.615384615)        | 9 (0.346153846)         | 1 (0.038461538)        | 0.2883            | 0.5209255          |
| 30       | Selective Serotonin Reuptake Inhibitor Pathway Pharmacodynamics     | 25          | 14 (0.56)               | 11 (0.44)               | 0 (0)                  | 0.3053            | 0.5326204          |
| 31       | Uricosurics Pathway Pharmacodynamics                                | 12          | 6 (0.5)                 | 6 (0.5)                 | 0 (0)                  | 0.323             | 0.536284           |
| 32       | Metformin Pathway Pharmacodynamic                                   | 27          | 19 (0.703703704)        | 7 (0.259259259)         | 1 (0.037037037)        | 0.3354            | 0.536284           |

|    |                                                                         |    |                  |                  |                 |        |           |
|----|-------------------------------------------------------------------------|----|------------------|------------------|-----------------|--------|-----------|
| 33 | Thiopurine Pathway Pharmacokinetics Pharmacodynamics                    | 20 | 11 (0.55)        | 9 (0.45)         | 0 (0)           | 0.3392 | 0.536284  |
| 34 | Platelet Aggregation Inhibitor Pathway Pharmacodynamics                 | 48 | 29 (0.604166667) | 18 (0.375)       | 1 (0.020833333) | 0.3926 | 0.6019014 |
| 35 | Doxorubicin Pathway Pharmacokinetics                                    | 21 | 12 (0.571428571) | 9 (0.428571429)  | 0 (0)           | 0.427  | 0.6353865 |
| 36 | Ifosfamide Pathway Pharmacodynamics                                     | 13 | 7 (0.538461538)  | 6 (0.461538462)  | 0 (0)           | 0.445  | 0.6432517 |
| 37 | Antidiabetic Drug Potassium Channel Inhibitors Pathway Pharmacodynamics | 26 | 16 (0.615384615) | 10 (0.384615385) | 0 (0)           | 0.6011 | 0.8033018 |
| 38 | Methotrexate Pathway Cancer Cell Pharmacodynamics                       | 15 | 12 (0.8)         | 3 (0.2)          | 0 (0)           | 0.6208 | 0.8033018 |
| 39 | Tacrolimus Cyclosporine Pathway Pharmacodynamics                        | 39 | 25 (0.641025641) | 14 (0.358974359) | 0 (0)           | 0.6363 | 0.8033018 |
| 40 | Doxorubicin Pathway Cancer Cell Pharmacodynamics                        | 12 | 7 (0.583333333)  | 5 (0.416666667)  | 0 (0)           | 0.6652 | 0.8033018 |
| 41 | Gemcitabine Pathway                                                     | 12 | 7 (0.583333333)  | 5 (0.416666667)  | 0 (0)           | 0.6652 | 0.8033018 |
| 42 | Valproic Acid Pathway Pharmacokinetics                                  | 18 | 14 (0.777777778) | 4 (0.222222222)  | 0 (0)           | 0.6761 | 0.8033018 |
| 43 | Fluoropyrimidine Pathway Pharmacokinetics                               | 21 | 13 (0.619047619) | 8 (0.380952381)  | 0 (0)           | 0.6816 | 0.8033018 |
| 44 | Busulfan Pathway Pharmacodynamics                                       | 14 | 11 (0.785714286) | 3 (0.214285714)  | 0 (0)           | 0.7041 | 0.8033018 |
| 45 | Benzodiazepine Pathway Pharmacodynamics                                 | 14 | 11 (0.785714286) | 3 (0.214285714)  | 0 (0)           | 0.7041 | 0.8033018 |
| 46 | Doxorubicin Pathway Cardiomyocyte Cell Pharmacodynamics                 | 21 | 16 (0.761904762) | 5 (0.238095238)  | 0 (0)           | 0.7145 | 0.8033018 |
| 47 | Bisphosphonate Pathway Pharmacodynamics                                 | 16 | 10 (0.625)       | 6 (0.375)        | 0 (0)           | 0.7713 | 0.846192  |
| 48 | Antimetabolite Pathway Folate Cycle Pharmacodynamics                    | 13 | 10 (0.769230769) | 3 (0.230769231)  | 0 (0)           | 0.7861 | 0.846192  |
| 49 | Nicotine Pathway Dopaminergic Neuron Pharmacodynamics                   | 43 | 30 (0.697674419) | 13 (0.302325581) | 0 (0)           | 0.8056 | 0.8466169 |
| 50 | Irinotecan Pathway Pharmacodynamics                                     | 14 | 9 (0.642857143)  | 5 (0.357142857)  | 0 (0)           | 0.8555 | 0.8466169 |
| 51 | Sympathetic Nerve Pathway Neuroeffector Junction                        | 21 | 15 (0.714285714) | 6 (0.285714286)  | 0 (0)           | 0.8818 | 0.8466169 |
| 52 | Statin Pathway Pharmacodynamics                                         | 22 | 15 (0.681818182) | 7 (0.318181818)  | 0 (0)           | 0.8893 | 0.8466169 |
| 53 | Abacavir Pathway Pharmacokinetics Pharmacodynamics                      | 11 | 8 (0.727272727)  | 3 (0.272727273)  | 0 (0)           | 0.9193 | 0.8466169 |
| 54 | Gemtuzumabozogamicin Pathway Pharmacokinetics Pharmacodynamics          | 16 | 11 (0.6875)      | 5 (0.3125)       | 0 (0)           | 0.9219 | 0.8466169 |
| 55 | ACEInhibitor Pathway Pharmacodynamics                                   | 16 | 11 (0.6875)      | 5 (0.3125)       | 0 (0)           | 0.9219 | 0.8466169 |
| 56 | Agents Acting on the Renin Angiotensin System Pathway Pharmacodynamics  | 16 | 11 (0.6875)      | 5 (0.3125)       | 0 (0)           | 0.9219 | 0.8466169 |
| 57 | Warfarin Pathway Pharmacodynamics                                       | 13 | 9 (0.692307692)  | 4 (0.307692308)  | 0 (0)           | 0.9371 | 0.8466169 |

**Table S8.** Std-z score of representative SNP (with highest std-z score) of genes in the pathways which are under natural selection.

|                                                                        | SNP-ID         | Gene           | Std-z score |                                     | SNP-ID         | Gene           | Std-z score    |                                                    | SNP-ID      | Gene          | Std-z score    |                                                    | SNP-ID                                               | Gene           | Std-z score    |             |
|------------------------------------------------------------------------|----------------|----------------|-------------|-------------------------------------|----------------|----------------|----------------|----------------------------------------------------|-------------|---------------|----------------|----------------------------------------------------|------------------------------------------------------|----------------|----------------|-------------|
| Taxane pathways:<br>Pharmacokinetics                                   | rs7909236      | <i>CYP2C8</i>  | 0.648219785 | Ibuprofen pathway: pharmacokinetics | rs11231294     | <i>SLC22A6</i> | 0.547420194    | Beta agonist beta blocker pathway: pharmacodynamic | rs3804984   | <i>ITPR1</i>  | 7.52×10-05     | Beta agonist beta blocker pathway: pharmacodynamic | rs6017996                                            | <i>SRC</i>     | 3.064644451    |             |
|                                                                        | rs17216177     | <i>ABCC2</i>   | 0.698375272 |                                     | rs1054804      | <i>UGT1A3</i>  | 0.592583812    |                                                    | rs1051738   | <i>PDE4A</i>  | -0.90554537    |                                                    | rs326162                                             | <i>ADCY2</i>   | 3.112587554    |             |
|                                                                        | rs3784863      | <i>ABCC1</i>   | 0.715639496 |                                     | rs4641393      | <i>CYP2C19</i> | 0.601325053    |                                                    | rs2089480   | <i>ARRB2</i>  | -0.095643647   |                                                    | rs8006278                                            | <i>GNG2</i>    | 3.1420801      |             |
|                                                                        | rs1202184      | <i>ABCB1</i>   | 2.337419052 |                                     | rs7909236      | <i>CYP2C8</i>  | 0.648219785    |                                                    | rs312397    | <i>GNG5</i>   | 0.018316974    |                                                    | rs1536014                                            | <i>PRKCH</i>   | 3.181269651    |             |
|                                                                        | rs10242455     | <i>CYP3A5</i>  | 2.96776873  |                                     | rs34687        | <i>AMACR</i>   | 0.65929798     |                                                    | rs12791853  | <i>ADRBK1</i> | 0.051846493    |                                                    | rs7975385                                            | <i>ADCY6</i>   | 3.183066335    |             |
|                                                                        | rs1056836      | <i>CYP1B1</i>  | 3.136306384 |                                     | rs6600884      | <i>UGT2B7</i>  | 0.674197776    |                                                    | rs12742323  | <i>GNB1</i>   | 0.114144883    |                                                    | rs12230535                                           | <i>CACNA1C</i> | 3.192157951    |             |
|                                                                        | rs1403527      | <i>NR1I2</i>   | 3.361005362 |                                     | rs1080755      | <i>UGT2B4</i>  | 0.676123319    |                                                    | rs4981504   | <i>ADCY4</i>  | 0.342919923    |                                                    | rs6086653                                            | <i>PLCB1</i>   | 3.225401467    |             |
|                                                                        | rs2622610      | <i>ABCG2</i>   | 3.662585022 |                                     | rs11045821     | <i>SLCO1B1</i> | 0.680895057    |                                                    | rs4631721   | <i>SLC9A1</i> | 0.374422602    |                                                    | rs6986535                                            | <i>ADCY8</i>   | 3.28680649     |             |
|                                                                        | rs2196019      | <i>SLCO1B3</i> | 5.578785151 |                                     | rs17216177     | <i>ABCC2</i>   | 0.698375272    |                                                    | rs2305648   | <i>PLCB2</i>  | 0.39195199     |                                                    | rs6504438                                            | <i>PRKCA</i>   | 3.288267362    |             |
|                                                                        | rs1851426      | <i>CYP3A4</i>  | 5.60910014  |                                     | rs9332242      | <i>CYP2C9</i>  | 0.711510074    |                                                    | rs307952    | <i>PRKCG</i>  | 0.414992685    |                                                    | rs1883488                                            | <i>PLCB4</i>   | 3.320398244    |             |
| Fluvastatin pathways:<br>pharmacokinetics                              | rs6742078      | <i>UGT1A1</i>  | 0.455625814 | rs2602381                           | <i>UGT1A9</i>  | 0.717774468    | rs2292857      | <i>PRKCZ</i>                                       | 0.523994043 | rs12106549    | <i>GNB1L</i>   | 3.387111554                                        | Zidovudin pathways:<br>pharmacokinetics and dynamics | rs2159359      | <i>NME1</i>    | 0.252374101 |
|                                                                        | rs1054804      | <i>UGT1A3</i>  | 0.592583812 | rs2766481                           | <i>ABCC4</i>   | 2.20317462     | rs1359062      | <i>RGS1</i>                                        | 0.530863755 | rs9923820     | <i>PRKCB</i>   | 3.391422579                                        |                                                      | rs2661679      | <i>TK1</i>     | 0.486153636 |
|                                                                        | rs4641393      | <i>CYP2C19</i> | 0.601325053 | rs631157                            | <i>SLC22A9</i> | 2.522943189    | rs9904111      | <i>SLC9A3R1</i>                                    | 0.567320755 | rs943450      | <i>PRKCQ</i>   | 3.41717054                                         |                                                      | rs11231294     | <i>SLC22A6</i> | 0.547420194 |
|                                                                        | rs7909236      | <i>CYP2C8</i>  | 0.648219785 | rs11231300                          | <i>SLC22A8</i> | 3.215994776    | rs17799872     | <i>ADCY3</i>                                       | 0.570214878 | rs6766988     | <i>CACNA1D</i> | 3.503937932                                        |                                                      | rs6600884      | <i>UGT2B7</i>  | 0.674197776 |
|                                                                        | rs6600884      | <i>UGT2B7</i>  | 0.674197776 | rs2196019                           | <i>SLCO1B3</i> | 5.578785151    | rs2434389      | <i>SLC9A3</i>                                      | 0.59265757  | rs11137364    | <i>CACNA1B</i> | 3.823808258                                        |                                                      | rs9332242      | <i>CYP2C9</i>  | 0.711510074 |
|                                                                        | rs11045821     | <i>SLCO1B1</i> | 0.680895057 | rs1851426                           | <i>CYP3A4</i>  | 5.60910014     | rs1601770      | <i>ELF2</i>                                        | 0.639562083 | rs943450      | <i>PRKCQ</i>   | 3.41717054                                         |                                                      | rs2766481      | <i>ABCC4</i>   | 2.20317462  |
|                                                                        | rs12361540     | <i>SLCO2B1</i> | 0.687367222 | rs12718462                          | <i>APOA1</i>   | -0.083483207   | rs9936021      | <i>ADCY7</i>                                       | 0.670809301 | rs6766988     | <i>CACNA1D</i> | 3.503937932                                        |                                                      | rs1202184      | <i>ABCB1</i>   | 2.337419052 |
|                                                                        | rs9332242      | <i>CYP2C9</i>  | 0.711510074 | rs1736493                           | <i>PLTP</i>    | 0.232349371    | rs5755074      | <i>MAPK1</i>                                       | 0.67579971  | rs10775349    | <i>ADCY9</i>   | 3.87143019                                         |                                                      | rs12438877     | <i>SLC28A1</i> | 2.432255969 |
|                                                                        | rs4772126      | <i>SLC15A1</i> | 2.723151041 | rs12709889                          | <i>APOC2</i>   | 0.282473096    | rs10937003     | <i>GNB4</i>                                        | 0.687884723 | rs7592092     | <i>PRKCE</i>   | 4.28321397                                         |                                                      | rs2070676      | <i>CYP2E1</i>  | 2.665623581 |
|                                                                        | rs10242455     | <i>CYP3A5</i>  | 2.96776873  | rs1466535                           | <i>LRP1</i>    | 0.369319416    | rs5755074      | <i>MAPK1</i>                                       | 0.67579971  | rs715534      | <i>ADRBK2</i>  | 4.66641134                                         |                                                      | rs3898649      | <i>POR</i>     | 2.695696283 |
| rs2196019                                                              | <i>SLCO1B3</i> | 5.578785151    | rs3757973   | <i>DGAT1</i>                        | 0.409931782    | rs11982719     | <i>ADCY1</i>   | 0.690640633                                        | rs6429197   | <i>GNG4</i>   | 4.815476342    | rs7124676                                          | <i>SLC22A11</i>                                      | 2.754998151    |                |             |
| rs1851426                                                              | <i>CYP3A4</i>  | 5.60910014     | rs12709889  | <i>APOC2</i>                        | 0.282473096    | rs12403523     | <i>CACNA1S</i> | 0.692805313                                        | rs10059859  | <i>PDE4D</i>  | 5.598378276    | rs7613247                                          | <i>ABCC5</i>                                         | 2.93621938     |                |             |
| Atorvastatin, Lovastatin,<br>Simvastatin pathways:<br>pharmacokinetics | rs6742078      | <i>UGT1A1</i>  | 0.455625814 | rs1466535                           | <i>LRP1</i>    | 0.369319416    | rs11982719     | <i>ADCY1</i>                                       | 0.690640633 | rs10775349    | <i>ADCY9</i>   | 3.87143019                                         | rs4605213                                            | <i>NME2</i>    | 2.990114016    |             |
|                                                                        | rs1054804      | <i>UGT1A3</i>  | 0.592583812 | rs3757973                           | <i>DGAT1</i>   | 0.409931782    | rs12403523     | <i>CACNA1S</i>                                     | 0.692805313 | rs7592092     | <i>PRKCE</i>   | 4.28321397                                         |                                                      |                |                |             |
|                                                                        | rs4641393      | <i>CYP2C19</i> | 0.601325053 | rs7396835                           | <i>APOA4</i>   | 0.475858712    | rs10268519     | <i>GNAI1</i>                                       | 0.693272348 | rs715534      | <i>ADRBK2</i>  | 4.66641134                                         |                                                      |                |                |             |
|                                                                        | rs7909236      | <i>CYP2C8</i>  | 0.648219785 | rs6709904                           | <i>ABCG8</i>   | 0.490564557    | rs7546625      | <i>PRKACB</i>                                      | 0.709334077 | rs6429197     | <i>GNG4</i>    | 4.815476342                                        |                                                      |                |                |             |
|                                                                        | rs6600884      | <i>UGT2B7</i>  | 0.674197776 | rs2071521                           | <i>APOC3</i>   | 0.57671236     | rs11144780     | <i>PRKACG</i>                                      | 0.719185903 | rs10059859    | <i>PDE4D</i>   | 5.598378276                                        |                                                      |                |                |             |
|                                                                        | rs11045821     | <i>SLCO1B1</i> | 0.680895057 | rs13251066                          | <i>CYP7A1</i>  | 0.609493833    | rs1016160      | <i>SLC9A2</i>                                      | 0.720624374 | rs2159359     | <i>NME1</i>    | 0.252374101                                        |                                                      |                |                |             |
|                                                                        | rs12361540     | <i>SLCO2B1</i> | 0.687367222 | rs3846663                           | <i>HMGCR</i>   | 0.614390253    | rs17133858     | <i>ARRB1</i>                                       | 0.72130222  | rs2661679     | <i>TK1</i>     | 0.486153636                                        |                                                      |                |                |             |
|                                                                        | rs9332242      | <i>CYP2C9</i>  | 0.711510074 | rs11600380                          | <i>APOA5</i>   | 0.625697665    | rs11803546     | <i>GNAI3</i>                                       | 2.426151765 | rs11231294    | <i>SLC22A6</i> | 0.547420194                                        |                                                      |                |                |             |
|                                                                        | rs1202184      | <i>ABCB1</i>   | 2.337419052 | rs253                               | <i>LPL</i>     | 0.661892621    | rs2116715      | <i>ADRB2</i>                                       | 2.447988511 | rs6600884     | <i>UGT2B7</i>  | 0.674197776                                        |                                                      |                |                |             |
|                                                                        | rs10242455     | <i>CYP3A5</i>  | 2.96776873  | rs5929                              | <i>LDLR</i>    | 0.672221282    | rs2238646      | <i>PDE4C</i>                                       | 2.583139195 | rs9332242     | <i>CYP2C9</i>  | 0.711510074                                        |                                                      |                |                |             |

|           |                |             |            |               |             |            |                 |             |            |                |             |
|-----------|----------------|-------------|------------|---------------|-------------|------------|-----------------|-------------|------------|----------------|-------------|
| rs2196019 | <i>SLCO1B3</i> | 5.578785151 | rs520354   | <i>APOB</i>   | 2.732249088 | rs3211995  | <i>SLC9A3R2</i> | 2.800438252 | rs11231300 | <i>SLC22A8</i> | 3.215994776 |
| rs1851426 | <i>CYP3A4</i>  | 5.60910014  | rs4148189  | <i>ABCG5</i>  | 2.832264577 | rs2236944  | <i>GNAI2</i>    | 2.83215761  | rs12347156 | <i>SLC28A3</i> | 3.392861021 |
| -         |                |             | rs11057825 | <i>SCARB1</i> | 2.969047374 | rs519712   | <i>PDE4B</i>    | 2.862251109 | rs2622610  | <i>ABCG2</i>   | 3.662585022 |
|           |                |             | rs1123140  | <i>FDFT1</i>  | 3.240649696 | rs10934643 | <i>ADCY5</i>    | 2.960810042 | rs1851426  | <i>CYP3A4</i>  | 5.60910014  |
|           |                |             | rs11071385 | <i>LIPC</i>   | 3.707064276 | rs6100260  | <i>GNAS</i>     | 3.031807924 | -          |                |             |

**Table S9.** “Hard sweeps” signals of selection in all categories

| PhaseI      | Category | SNP-id     | Gene           | std-z score | Category             | SNP-id     | Gene                 | std-z score          | Category             | SNP-id               | Gene            | std-z score | Category             | SNP-id     | Gene           | std-z score |
|-------------|----------|------------|----------------|-------------|----------------------|------------|----------------------|----------------------|----------------------|----------------------|-----------------|-------------|----------------------|------------|----------------|-------------|
|             |          | PI         | Transporter    | Modifier    |                      | Extended   | Other pathways genes | Other pathways genes |                      | Other pathways genes |                 |             |                      |            |                |             |
| Transporter | Core     | rs1851426  | <i>CYP3A4</i>  | 5.60910014  | Other pathways genes | rs16834954 | <i>HDAC1</i>         | 3.1834568            | Other pathways genes | rs10434525           | <i>PDE4D</i>    | 3.42598003  | Other pathways genes | rs11231735 | <i>BAD</i>     | 3.3094922   |
|             |          | rs11723264 | <i>ABCG2</i>   | 3.296256731 |                      | rs6697130  | <i>HDAC1</i>         | 3.2622479            |                      | rs12515974           | <i>PDE4D</i>    | 3.22770667  |                      | rs10896065 | <i>FOSL1</i>   | 3.2050935   |
|             |          | rs2196019  | <i>SLCO1B3</i> | 5.578785151 |                      | rs2984915  | <i>JUN</i>           | 3.4680616            |                      | rs13361335           | <i>HTR1A</i>    | 3.10210784  |                      | rs12230535 | <i>CACNA1C</i> | 3.192158    |
|             |          | rs2622610  | <i>ABCG2</i>   | 3.662585022 |                      | rs4372299  | <i>AK4</i>           | 3.1702437            |                      | rs9293908            | <i>KCNQ5</i>    | 4.03315031  |                      | rs758563   | <i>CACNA1C</i> | 3.0950105   |
|             |          | rs2725267  | <i>ABCG2</i>   | 3.429827945 |                      | rs6699614  | <i>AK4</i>           | 3.3206238            |                      | rs9442844            | <i>KCNQ5</i>    | 3.90392314  |                      | rs7295775  | <i>CACNA1C</i> | 3.0535714   |
|             |          | rs919840   | <i>SLCO1B3</i> | 3.54271229  |                      | rs10889906 | <i>PTGER3</i>        | 3.620197             |                      | rs7756180            | <i>KCNQ5</i>    | 3.56324104  |                      | rs10466907 | <i>CACNA1C</i> | 3.1689571   |
| Modifier    | Extended | rs10281281 | <i>CFTR</i>    | 3.655771963 | Other pathways genes | rs2878575  | <i>ATPIA1</i>        | 3.1414203            | Other pathways genes | rs2840799            | <i>KCNQ5</i>    | 3.01631337  | Other pathways genes | rs7957163  | <i>CACNA1C</i> | 3.1325578   |
|             |          | rs11103482 | <i>RXRA</i>    | 3.300724399 |                      | rs7539947  | <i>ATPIA1</i>        | 3.1520018            |                      | rs6921049            | <i>KCNQ5</i>    | 3.32042411  |                      | rs7958883  | <i>VWF</i>     | 3.5174097   |
|             |          | rs11712211 | <i>NR1I2</i>   | 3.33778217  |                      | rs6668161  | <i>ATPIA1</i>        | 3.1942228            |                      | rs9446834            | <i>KCNQ5</i>    | 3.38923352  |                      | rs723188   | <i>VWF</i>     | 3.1914828   |
|             |          | rs1403527  | <i>NR1I2</i>   | 3.361005362 |                      | rs1407716  | <i>ATPIA1</i>        | 3.6254824            |                      | rs6453633            | <i>KCNQ5</i>    | 3.40676011  |                      | rs1800387  | <i>VWF</i>     | 3.1508135   |
|             |          | rs17139943 | <i>CFTR</i>    | 3.307159918 |                      | rs6428896  | <i>ATPIA1</i>        | 5.6148511            |                      | rs9293920            | <i>KCNQ5</i>    | 3.73059716  |                      | rs7975385  | <i>ADCY6</i>   | 3.1830663   |
|             |          | rs1899951  | <i>PPARG</i>   | 3.288482285 |                      | rs6681761  | <i>UCK2</i>          | 3.2051442            |                      | rs9442895            | <i>KCNQ5</i>    | 3.07857291  |                      | rs1554807  | <i>STX2</i>    | 3.3137344   |
|             |          | rs2472670  | <i>NR1I2</i>   | 3.326126581 |                      | rs3766989  | <i>CACNA1E</i>       | 3.023893             |                      | rs6929988            | <i>KCNQ5</i>    | 3.09482401  |                      | rs10848205 | <i>STX2</i>    | 3.6903334   |
|             |          | rs2472671  | <i>NR1I2</i>   | 3.329980657 |                      | rs2271414  | <i>PIK3C2B</i>       | 3.0231949            |                      | rs220729             | <i>MAS1</i>     | 3.02961571  |                      | rs2037789  | <i>STX2</i>    | 3.3264812   |
|             |          | rs4684104  | <i>PPARG</i>   | 3.631348439 |                      | rs2999479  | <i>PIK3C2B</i>       | 3.4397911            |                      | rs801763             | <i>HDAC9</i>    | 3.548346    |                      | rs1106369  | <i>STX2</i>    | 3.3246944   |
|             |          | rs6008197  | <i>PPARA</i>   | 4.125983761 |                      | rs6429196  | <i>GNG4</i>          | 3.0029958            |                      | rs2267716            | <i>CRHR2</i>    | 3.19703094  |                      | rs2001483  | <i>STX2</i>    | 3.1461612   |
|             |          | rs6457816  | <i>PPARD</i>   | 4.002995311 |                      | rs6429197  | <i>GNG4</i>          | 4.8154763            |                      | rs12668421           | <i>EGFR</i>     | 3.89814181  |                      | rs1609985  | <i>STX2</i>    | 3.6234698   |
|             |          | rs6906237  | <i>PPARD</i>   | 3.17958232  |                      | rs636167   | <i>RYR2</i>          | 3.2210013            |                      | rs11238349           | <i>EGFR</i>     | 4.12106097  |                      | rs10848212 | <i>STX2</i>    | 3.7199074   |
|             |          | rs7627605  | <i>PPARG</i>   | 4.345238795 |                      | rs581645   | <i>RYR2</i>          | 3.1273389            |                      | rs7781264            | <i>EGFR</i>     | 3.2922844   |                      | rs2387355  | <i>FLT3</i>    | 3.2116102   |
|             |          | rs9658100  | <i>PPARD</i>   | 4.604327323 |                      | rs2790326  | <i>CHRM3</i>         | 3.3806781            |                      | rs10270837           | <i>CACNA2D1</i> | 3.68992448  |                      | rs9554316  | <i>FLT1</i>    | 4.0877333   |
|             |          | rs10047560 | <i>PDE3A</i>   | 3.199794334 |                      | rs7527677  | <i>CHRM3</i>         | 3.2028451            |                      | rs10252208           | <i>TBXAS1</i>   | 3.59932497  |                      | rs9582036  | <i>FLT1</i>    | 3.8837962   |
|             |          | rs10137990 | <i>DHRS4</i>   | 3.523457569 |                      | rs7567003  | <i>KCNK3</i>         | 3.6726867            |                      | rs2270163            | <i>TBXAS1</i>   | 3.04092423  |                      | rs7981680  | <i>FLT1</i>    | 4.0565268   |
|             |          | rs1042026  | <i>ADH1B</i>   | 3.138823993 |                      | rs17023214 | <i>SOS1</i>          | 3.1178133            |                      | rs11765596           | <i>PRKAG2</i>   | 4.62751788  |                      | rs2093821  | <i>FLT1</i>    | 3.048008    |
|             |          | rs10438016 | <i>DHRS2</i>   | 3.046906403 |                      | rs7571608  | <i>SOS1</i>          | 3.0668693            |                      | rs1029951            | <i>PRKAG2</i>   | 3.17667474  |                      | rs8006278  | <i>GNG2</i>    | 3.1420801   |
|             |          | rs1056836  | <i>CYP1B1</i>  | 3.136306384 |                      | rs7564481  | <i>SOS1</i>          | 3.1706149            |                      | rs13235920           | <i>PRKAG2</i>   | 4.43864589  |                      | rs1536014  | <i>PRKCH</i>   | 3.1812697   |
|             |          | rs10744777 | <i>ALDH2</i>   | 3.311478082 |                      | rs4413199  | <i>PRKCE</i>         | 3.1671269            |                      | rs7796138            | <i>PRKAG2</i>   | 3.9234133   |                      | rs11158346 | <i>PRKCH</i>   | 3.0025389   |
|             |          | rs11066032 | <i>ALDH2</i>   | 3.395362679 |                      | rs3924521  | <i>PRKCE</i>         | 3.6569236            |                      | rs1123140            | <i>FDFT1</i>    | 3.2406497   |                      | rs10148271 | <i>JDP2</i>    | 3.5532691   |
|             |          | rs11097642 | <i>METAP1</i>  | 3.103200082 |                      | rs7592092  | <i>PRKCE</i>         | 4.283214             |                      | rs1383888            | <i>NRG1</i>     | 3.10383996  |                      | rs11071385 | <i>LIPC</i>    | 3.7070643   |
|             |          | rs11900892 | <i>XDH</i>     | 3.072459543 |                      | rs9287889  | <i>STK39</i>         | 3.1349941            |                      | rs369828             | <i>NRG1</i>     | 3.05400976  |                      | rs1025455  | <i>MAP2K1</i>  | 3.4595674   |
|             |          | rs11981167 | <i>CYP3A43</i> | 3.102703154 |                      | rs2459611  | <i>STAT4</i>         | 3.5582981            |                      | rs418362             | <i>NRG1</i>     | 3.06237771  |                      | rs10775349 | <i>ADCY9</i>   | 3.8714302   |
|             |          | rs12027066 | <i>ALDH9A1</i> | 3.254954944 |                      | rs7601754  | <i>STAT4</i>         | 3.6123645            |                      | rs367830             | <i>NRG1</i>     | 3.06083393  |                      | rs6500567  | <i>ADCY9</i>   | 3.0060239   |

|          |            |                |             |            |                 |           |            |                |            |            |               |           |
|----------|------------|----------------|-------------|------------|-----------------|-----------|------------|----------------|------------|------------|---------------|-----------|
| Phase II | rs1230178  | <i>METAP1</i>  | 3.704828454 | rs10931480 | <i>STAT4</i>    | 3.3770061 | rs327415   | <i>NRG1</i>    | 3.03061853 | rs2601831  | <i>ADCY9</i>  | 3.7069969 |
|          | rs12334538 | <i>EPHX2</i>   | 3.795110639 | rs4672912  | <i>AOX2P</i>    | 3.0225177 | rs1381871  | <i>NRG1</i>    | 3.01190626 | rs12103309 | <i>ADCY9</i>  | 3.0758123 |
|          | rs12909230 | <i>ALDH1A3</i> | 4.290975829 | rs13392814 | <i>ERBB4</i>    | 3.250341  | rs7821196  | <i>NRG1</i>    | 4.02468353 | rs2532001  | <i>ADCY9</i>  | 3.0255134 |
|          | rs1441817  | <i>ALDH1A2</i> | 3.109072914 | rs10208487 | <i>ERBB4</i>    | 3.0436439 | rs16879442 | <i>NRG1</i>    | 3.29162099 | rs9923820  | <i>PRKCB</i>  | 3.3914226 |
|          | rs2161850  | <i>GSR</i>     | 3.138350083 | rs11887436 | <i>ERBB4</i>    | 3.2561907 | rs16879445 | <i>NRG1</i>    | 3.26318229 | rs9788865  | <i>STX1B</i>  | 3.0958526 |
|          | rs2339840  | <i>ALDH2</i>   | 3.800667016 | rs6706854  | <i>ERBB4</i>    | 3.8393287 | rs12679324 | <i>NRG1</i>    | 3.63939058 | rs11150604 | <i>STX4</i>   | 4.7854538 |
|          | rs2671272  | <i>EPHX1</i>   | 3.057048258 | rs6435649  | <i>ERBB4</i>    | 3.6379111 | rs16879557 | <i>NRG1</i>    | 3.76712315 | rs12447311 | <i>PLCG2</i>  | 3.2163034 |
|          | rs2854450  | <i>EPHX1</i>   | 3.070424274 | rs4423543  | <i>ERBB4</i>    | 3.0384791 | rs6982753  | <i>CHRNA6</i>  | 3.11566611 | rs2168858  | <i>STX8</i>   | 3.0070663 |
|          | rs3805322  | <i>ADH4</i>    | 4.498988724 | rs2139939  | <i>ERBB4</i>    | 3.6757588 | rs892413   | <i>CHRNA6</i>  | 3.04743671 | rs1133295  | <i>STX8</i>   | 3.0471714 |
|          | rs472660   | <i>CYP3A43</i> | 4.320766471 | rs1521553  | <i>ERBB4</i>    | 3.4965248 | rs1231201  | <i>PRKDC</i>   | 3.08578715 | rs2159141  | <i>MAP2K4</i> | 3.1247165 |
|          | rs4737681  | <i>CYP7B1</i>  | 3.524094358 | rs1521550  | <i>ERBB4</i>    | 3.4222104 | rs6984398  | <i>CRH</i>     | 3.00073884 | rs1058166  | <i>HNF1B</i>  | 3.1208057 |
|          | rs4767944  | <i>ALDH2</i>   | 3.634776642 | rs6435689  | <i>ERBB4</i>    | 3.5795805 | rs7013524  | <i>CRH</i>     | 3.81983846 | rs242924   | <i>CRHR1</i>  | 3.0527085 |
|          | rs501275   | <i>CYP3A43</i> | 3.624484208 | rs7560730  | <i>ERBB4</i>    | 4.7659535 | rs6986535  | <i>ADCY8</i>   | 3.28680649 | rs12944877 | <i>GNAI3</i>  | 3.6272293 |
|          | rs642761   | <i>CYP3A43</i> | 4.392995902 | rs1357142  | <i>ERBB4</i>    | 3.3780847 | rs7815277  | <i>ADCY8</i>   | 3.23977508 | rs1533075  | <i>GNAI3</i>  | 3.5154491 |
|          | rs6558002  | <i>EPHX2</i>   | 3.082187715 | rs1521652  | <i>ERBB4</i>    | 3.9008694 | rs4736462  | <i>ADCY8</i>   | 3.11429427 | rs11656396 | <i>GNAI3</i>  | 3.052676  |
|          | rs6870785  | <i>ALDH7A1</i> | 3.33501115  | rs1012747  | <i>ERBB4</i>    | 3.9082823 | rs12545796 | <i>ADCY8</i>   | 3.203146   | rs4791242  | <i>GNAI3</i>  | 3.6692325 |
|          | rs7015380  | <i>SULF1</i>   | 3.176102046 | rs4672645  | <i>ERBB4</i>    | 3.1209626 | rs11995439 | <i>ADCY8</i>   | 3.18606742 | rs6504438  | <i>PRKCA</i>  | 3.2882674 |
|          | rs7683532  | <i>METAP1</i>  | 3.107445521 | rs7586969  | <i>ATIC</i>     | 3.4653924 | rs4736727  | <i>ADCY8</i>   | 3.13464996 | rs9904728  | <i>ATP5H</i>  | 3.097687  |
|          | rs7736031  | <i>ALDH7A1</i> | 3.244859299 | rs16859382 | <i>PRKAG3</i>   | 4.4147381 | rs944481   | <i>SHC3</i>    | 3.37665969 | rs4789143  | <i>NT5C</i>   | 3.3238132 |
|          | rs7829823  | <i>SULF1</i>   | 3.113818052 | rs3729931  | <i>RAF1</i>     | 3.1669237 | rs4836886  | <i>PTGS1</i>   | 3.39277132 | rs1076094  | <i>GRB2</i>   | 3.0621962 |
|          | rs8010151  | <i>DHRS4</i>   | 3.410793528 | rs2442809  | <i>RAF1</i>     | 3.096281  | rs4836887  | <i>PTGS1</i>   | 3.39499353 | rs6501786  | <i>GRB2</i>   | 3.8872775 |
|          | rs9805889  | <i>DHRS4</i>   | 3.452804966 | rs6766988  | <i>CACNAID</i>  | 3.5039379 | rs4836888  | <i>PTGS1</i>   | 3.39528943 | rs4789188  | <i>GRB2</i>   | 4.1817875 |
|          | rs11934139 | <i>GSTCD</i>   | 5.634440892 | rs9853660  | <i>CACNA2D3</i> | 3.2520616 | rs9299280  | <i>PTGS1</i>   | 3.40408562 | rs4789193  | <i>GRB2</i>   | 3.501816  |
|          | rs13148869 | <i>GSTCD</i>   | 5.634440892 | rs9810700  | <i>CACNA2D3</i> | 3.2453474 | rs10306187 | <i>PTGS1</i>   | 3.60365601 | rs4640267  | <i>NEDD4L</i> | 3.0389225 |
|          | rs13152031 | <i>UGT8</i>    | 3.127875584 | rs9847961  | <i>CACNA2D3</i> | 3.4137661 | rs11244164 | <i>ABLI</i>    | 3.53371261 | rs1787773  | <i>NEDD4L</i> | 3.0680754 |
|          | rs3791358  | <i>CHST10</i>  | 3.078068634 | rs4681440  | <i>AGTR1</i>    | 3.4648586 | rs4740377  | <i>ABLI</i>    | 3.28785998 | rs6086653  | <i>PLCB1</i>  | 3.2254015 |
|          | rs4521362  | <i>UGT8</i>    | 3.246129948 | rs4681443  | <i>AGTR1</i>    | 3.4648872 | rs11137364 | <i>CACNA1B</i> | 3.82380826 | rs1883488  | <i>PLCB4</i>  | 3.3203982 |
|          | rs4698951  | <i>GSTCD</i>   | 3.192096298 | rs4681444  | <i>AGTR1</i>    | 3.4713733 | rs2236380  | <i>PRKCQ</i>   | 3.13344038 | rs819147   | <i>AHCY</i>   | 3.0766003 |
|          | rs4805930  | <i>CHST8</i>   | 3.741709262 | rs1492100  | <i>AGTR1</i>    | 3.0622976 | rs11596750 | <i>PRKCQ</i>   | 3.09581902 | rs6017996  | <i>SRC</i>    | 3.0646445 |
|          | rs4834424  | <i>UGT8</i>    | 3.388034316 | rs2342309  | <i>PCYT1A</i>   | 3.2633019 | rs943450   | <i>PRKCQ</i>   | 3.41717054 | rs4812040  | <i>GNAS</i>   | 3.0284452 |
|          | rs4834426  | <i>UGT8</i>    | 3.26907265  | rs12632779 | <i>PCYT1A</i>   | 3.5206544 | rs7072496  | <i>PRKCQ</i>   | 3.38226811 | rs6100260  | <i>GNAS</i>   | 3.0318079 |
|          | rs4834427  | <i>UGT8</i>    | 3.180948098 | rs6446647  | <i>STX18</i>    | 3.6628182 | rs1887327  | <i>PRKCQ</i>   | 3.37646266 | rs3895449  | <i>KCNQ2</i>  | 3.2817205 |
|          | rs6533218  | <i>GSTCD</i>   | 5.60910014  | rs6841963  | <i>STX18</i>    | 3.632184  | rs4623785  | <i>CAMK1D</i>  | 3.7229142  | rs1052978  | <i>GNBIL</i>  | 3.1727304 |
|          | rs6815181  | <i>UGT8</i>    | 3.207004849 | rs10805074 | <i>DCK</i>      | 3.6219414 | rs3737180  | <i>ZEB1</i>    | 3.75270214 | rs12106549 | <i>GNBIL</i>  | 3.3871116 |
|          | rs6831964  | <i>UGT8</i>    | 3.188523115 | rs7684954  | <i>DCK</i>      | 3.6178725 | rs7894459  | <i>ZEB1</i>    | 3.83044223 | rs6518585  | <i>GNBIL</i>  | 3.3837038 |
|          | rs7686242  | <i>UGT8</i>    | 3.203322365 | rs2851060  | <i>PPP3CA</i>   | 3.5803671 | rs161279   | <i>ZEB1</i>    | 3.5887484  | rs16980239 | <i>ADRBK2</i> | 3.1961178 |
|          | rs7906892  | <i>GSTO1</i>   | 3.073267976 | rs4698804  | <i>EGF</i>      | 3.5641027 | rs161258   | <i>ZEB1</i>    | 3.10648723 | rs16980512 | <i>ADRBK2</i> | 3.6086105 |

|             |            |                 |             |            |              |           |            |                |            |           |                |           |
|-------------|------------|-----------------|-------------|------------|--------------|-----------|------------|----------------|------------|-----------|----------------|-----------|
| Transporter | rs835316   | <i>UGT2B10</i>  | 3.013089445 | rs6840127  | <i>NR3C2</i> | 3.4465294 | rs161272   | <i>ZEB1</i>    | 3.7803372  | rs3730114 | <i>ADRBK2</i>  | 3.8414209 |
|             | rs11231300 | <i>SLC22A8</i>  | 3.215994776 | rs2171083  | <i>VEGFC</i> | 5.6257595 | rs161275   | <i>ZEB1</i>    | 3.48646289 | rs715534  | <i>ADRBK2</i>  | 4.6664113 |
|             | rs1158335  | <i>SLC22A15</i> | 3.220116581 | rs1995083  | <i>VEGFC</i> | 4.5569004 | rs1761379  | <i>ZEB1</i>    | 3.39061409 | rs5750871 | <i>CACNAII</i> | 3.2714076 |
|             | rs12347156 | <i>SLC28A3</i>  | 3.392861021 | rs6857752  | <i>VEGFC</i> | 3.0183113 | rs220073   | <i>ZEB1</i>    | 3.54653944 | rs6001649 | <i>CACNAII</i> | 3.1781263 |
|             | rs1275526  | <i>SLC5A6</i>   | 3.204560401 | rs4488887  | <i>VEGFC</i> | 3.0071001 | rs2289805  | <i>MAPK8</i>   | 3.49869537 | rs739092  | <i>TSPO</i>    | 3.1708662 |
|             | rs1515777  | <i>SLCO1C1</i>  | 3.964060639 | rs326162   | <i>ADCY2</i> | 3.1125876 | rs10762276 | <i>HK1</i>     | 3.85724534 |           |                |           |
|             | rs2077654  | <i>ABCC8</i>    | 3.760092969 | rs17589633 | <i>PDE4D</i> | 3.0881071 | rs7915217  | <i>NRG3</i>    | 3.21906469 |           |                |           |
|             | rs225372   | <i>ABCG1</i>    | 3.264884794 | rs3891334  | <i>PDE4D</i> | 3.1279141 | rs11574845 | <i>NFKB2</i>   | 3.08398527 |           |                |           |
|             | rs2413770  | <i>SLC28A2</i>  | 3.9932371   | rs16889853 | <i>PDE4D</i> | 3.2579803 | rs363333   | <i>SLC18A2</i> | 3.1552855  |           |                |           |
|             | rs3213473  | <i>ABCC6</i>    | 3.090094809 | rs173945   | <i>PDE4D</i> | 3.6965117 | rs2912754  | <i>FGFR2</i>   | 3.36832868 |           |                |           |
|             | rs3847305  | <i>ABCA1</i>    | 3.079380777 | rs16890314 | <i>PDE4D</i> | 3.0822322 | rs2912759  | <i>FGFR2</i>   | 3.04844918 |           |                |           |
|             | rs4075845  | <i>SLCO3A1</i>  | 3.338766023 | rs159622   | <i>PDE4D</i> | 3.1700629 | rs2420942  | <i>FGFR2</i>   | 3.21067791 |           |                |           |
|             | rs4148641  | <i>ABCC8</i>    | 3.065567524 | rs159608   | <i>PDE4D</i> | 3.4688445 | rs2981439  | <i>FGFR2</i>   | 3.05806992 |           |                |           |
|             | rs7524567  | <i>SLC16A1</i>  | 3.445812278 | rs10059859 | <i>PDE4D</i> | 5.5983783 | rs11814493 | <i>FGFR2</i>   | 3.29946245 |           |                |           |
|             | rs7767808  | <i>SLC22A16</i> | 3.633462281 | rs1949017  | <i>PDE4D</i> | 3.4173394 | rs12364575 | <i>CCKBR</i>   | 3.44438592 |           |                |           |

**Table S10.** EnSEMBL-BioMart mining for “Hard sweep” signals

| Gene              | rsID      | Title of article                                                                                                                                                                                            | References |
|-------------------|-----------|-------------------------------------------------------------------------------------------------------------------------------------------------------------------------------------------------------------|------------|
| <b>ADME genes</b> |           |                                                                                                                                                                                                             |            |
| <i>ADH1B</i>      | rs1042026 | ADH single nucleotide polymorphism associations with alcohol metabolism in vivo.                                                                                                                            | 3          |
| <i>ADH1B</i>      | rs1042026 | ADH1A variation predisposes to personality traits and substance dependence.                                                                                                                                 | 4          |
| <i>ADH1B</i>      | rs1042026 | Associations and interactions between SNPs in the alcohol metabolizing genes and alcoholism phenotypes in European Americans.                                                                               | 5          |
| <i>ADH1B</i>      | rs1042026 | Associations of ADH and ALDH2 gene variation with self report alcohol reactions, consumption and dependence: an integrated analysis.                                                                        | 6          |
| <i>ADH1B</i>      | rs1042026 | Diploptype trend regression analysis of the ADH gene cluster and the ALDH2 gene: multiple significant associations with alcohol dependence.                                                                 | 7          |
| <i>ADH1B</i>      | rs1042026 | Evidence of positive selection on a class I ADH locus.                                                                                                                                                      | 8          |
| <i>ADH1B</i>      | rs1042026 | Multiple ADH genes modulate risk for drug dependence in both African- and European-Americans.                                                                                                               | 9          |
| <i>ADH1B</i>      | rs1042026 | The ADH1B Arg47His polymorphism in east Asian populations and expansion of rice domestication in history.                                                                                                   | 10         |
| <i>CYP1B1</i>     | rs1056836 | Assessment of interactions between PAH exposure and genetic polymorphisms on PAH-DNA adducts in African American, Dominican, and Caucasian mothers and newborns.                                            | 11         |
| <i>CYP1B1</i>     | rs1056836 | Associations between smoking, polymorphisms in polycyclic aromatic hydrocarbon (PAH) metabolism and conjugation genes and PAH-DNA adducts in prostate tumors differ by race.                                | 12         |
| <i>CYP1B1</i>     | rs1056836 | Associations of common variants in genes involved in metabolism and response to exogenous chemicals with risk of multiple myeloma.                                                                          | 13         |
| <i>CYP1B1</i>     | rs1056836 | CYP1A1 and CYP1B1 polymorphisms and their association with estradiol and estrogen metabolites in women who are premenopausal and perimenopausal.                                                            | 14         |
| <i>CYP1B1</i>     | rs1056836 | Carcinogen metabolism, cigarette smoking, and breast cancer risk: a Bayes model averaging approach.                                                                                                         | 15         |
| <i>CYP1B1</i>     | rs1056836 | Chromosomal aberrations in tire plant workers and interaction with polymorphisms of biotransformation and DNA repair genes.                                                                                 | 16         |
| <i>CYP1B1</i>     | rs1056836 | Cytochrome 450 1B1 (CYP1B1) polymorphisms associated with response to docetaxel in Castration-Resistant Prostate Cancer (CRPC) patients.                                                                    | 17         |
| <i>CYP1B1</i>     | rs1056836 | Cytochrome P450 1B1 gene polymorphisms as predictors of anticancer drug activity: studies with in vitro models.                                                                                             | 18         |
| <i>CYP1B1</i>     | rs1056836 | Dietary phytoestrogen intake is associated with reduced colorectal cancer risk.                                                                                                                             | 19         |
| <i>CYP1B1</i>     | rs1056836 | Effect of cytochrome P450 polymorphism on arachidonic acid metabolism and their impact on cardiovascular diseases.                                                                                          | 20         |
| <i>CYP1B1</i>     | rs1056836 | Estrogen metabolism genotypes, use of long-term hormone replacement therapy and risk of postmenopausal breast cancer.                                                                                       | 21         |
| <i>CYP1B1</i>     | rs1056836 | Genetic association of aromatic hydrocarbon receptor (AHR) and cytochrome P450, family 1, subfamily A, polypeptide 1 (CYP1A1) polymorphisms with dioxin blood concentrations among pregnant Japanese women. | 22         |
| <i>CYP1B1</i>     | rs1056836 | Genetic variation in the bioactivation pathway for polycyclic hydrocarbons and heterocyclic amines in relation to risk of colorectal neoplasia.                                                             | 23         |
| <i>CYP1B1</i>     | rs1056836 | Joint effects of smoking and gene variants involved in sex steroid metabolism on hot flashes in late reproductive-age women.                                                                                | 24         |
| <i>CYP1B1</i>     | rs1056836 | Red meat intake, doneness, polymorphisms in genes that encode carcinogen-metabolizing enzymes, and colorectal cancer risk.                                                                                  | 25         |



|                            |            |                                                                                                                                                                                                   |    |
|----------------------------|------------|---------------------------------------------------------------------------------------------------------------------------------------------------------------------------------------------------|----|
| <i>CYP1B1</i>              | rs1056836  | The influence of metabolic gene polymorphisms on urinary 1-hydroxypyrene concentrations in Chinese coke oven workers.                                                                             | 26 |
| <i>CYP1B1</i>              | rs1056836  | Tobacco and estrogen metabolic polymorphisms and risk of non-small cell lung cancer in women.                                                                                                     | 27 |
| <i>CYP1B1</i>              | rs1056836  | Variation in PAH-related DNA adduct levels among non-smokers: the role of multiple genetic polymorphisms and nucleotide excision repair phenotype.                                                | 28 |
| <i>RXRA</i>                | rs11103482 | Effects of vitamin A and D receptor gene polymorphisms/haplotypes on immune responses to measles vaccine.                                                                                         | 29 |
| <i>NR1I2</i>               | rs1403527  | Human loci involved in drug biotransformation: worldwide genetic variation, population structure, and pharmacogenetic implications.                                                               | 30 |
| <i>CYP3A4</i>              | rs1851426  | Phenotype-genotype variability in the human CYP3A locus as assessed by the probe drug quinine and analyses of variant CYP3A4 alleles.                                                             | 31 |
| <i>EPHX1</i>               | rs2854450  | Genetic variants in antioxidant genes are associated with diisocyanate-induced asthma.                                                                                                            | 32 |
| <i>CYP3A43</i>             | rs472660   | Genetic variation in CYP3A43 explains racial difference in olanzapine clearance.                                                                                                                  | 33 |
| <i>PPARD</i>               | rs6457816  | Mechanisms of peripheral neuropathy associated with bortezomib and vincristine in patients with newly diagnosed multiple myeloma: a prospective analysis of data from the HOVON-65/GMMG-HD4 trial | 34 |
| <b>Other pathway genes</b> |            |                                                                                                                                                                                                   |    |
| <i>PDE4D</i>               | rs10059859 | Effect of Single Doses of Capromorelin and Ghrelin On Esophageal Reflux Parameters and Esophageal Function: A Randomized, Double-Blind, Placebo-Controlled Study                                  | -  |
| <i>STX4</i>                | rs11150604 | Dependency of phenprocoumon dosage on polymorphisms in the VKORC1, CYP2C9, and CYP4F2 genes                                                                                                       | 35 |
| <i>CRHR1</i>               | rs242924   | Genetic association of FKBP5 and CRHR1 with cortisol response to acute psychosocial stress in healthy adults.                                                                                     | 36 |
| <i>CRHR1</i>               | rs242924   | Interaction of childhood maltreatment with the corticotropin-releasing hormone receptor gene: effects on hypothalamic-pituitary-adrenal axis reactivity.                                          | 37 |
| <i>CRHR1</i>               | rs242924   | Personalized medicine in psychiatry: problems and promises.                                                                                                                                       | 38 |
| <i>JUN</i>                 | rs2984915  | The role of polymorphisms in Toll-like receptors and their associated intracellular signaling genes in measles vaccine immunity.                                                                  | 39 |
| <i>SLC18A2</i>             | rs363333   | Association of DNA polymorphisms in the synaptic vesicular amine transporter gene (SLC18A2) with alcohol and nicotine dependence.                                                                 | 40 |
| <i>SRC</i>                 | rs6017996  | Impact of genetic polymorphisms on adenoma recurrence and toxicity in a COX2 inhibitor (celecoxib) trial: results from a pilot study.                                                             | 41 |
| <i>CHRNA6</i>              | rs892413   | A candidate gene approach identifies the CHRNA5-A3-B4 region as a risk factor for age-dependent nicotine addiction.                                                                               | 42 |
| <i>CHRNA6</i>              | rs892413   | Genetic association of the CHRNA6 and CHRNB3 genes with tobacco dependence in a nationally representative sample.                                                                                 | 43 |
| <i>CHRNA6</i>              | rs892413   | SNPs in CHRNA6 and CHRNB3 are associated with alcohol consumption in a nationally representative sample.                                                                                          | 44 |
| <i>FLT1</i>                | rs9554316  | VEGFR1 single nucleotide polymorphisms associated with outcome in patients with metastatic renal cell carcinoma treated with sunitinib - a multicentric retrospective analysis.                   | 45 |
| <i>FLT1</i>                | rs9582036  | 14LBA Randomized phase 3 study of panitumumab with FOLFIRI vs FOLFIRI alone as second-line treatment (tx) in patients (pts) with metastatic colorectal cancer (mCRC)                              | -  |
| <i>FLT1</i>                | rs9582036  | 15LBA Intermittent versus continuous oxaliplatin-based combination chemotherapy in patients with advanced colorectal cancer: a randomised non-inferiority trial (MRC COIN)                        | -  |
| <i>FLT1</i>                | rs9582036  | 16LBA VEGFR-1 polymorphisms as potential predictors of clinical outcome in bevacizumab-treated patients with metastatic pancreatic cancer                                                         | -  |
| <i>FLT1</i>                | rs9582036  | Biomarker results from the AVADO phase 3 trial of first-line                                                                                                                                      | 46 |

|             |           |                                                                                                                                                                                 |    |
|-------------|-----------|---------------------------------------------------------------------------------------------------------------------------------------------------------------------------------|----|
|             |           | bevacizumab plus docetaxel for HER2-negative metastatic breast cancer.                                                                                                          |    |
| <i>FLT1</i> | rs9582036 | Pharmacogenetic biomarkers for the prediction of response to antiangiogenic treatment.                                                                                          | 47 |
| <i>FLT1</i> | rs9582036 | Understanding and targeting resistance to anti-angiogenic therapies.                                                                                                            | 48 |
| <i>FLT1</i> | rs9582036 | VEGF pathway genetic variants as biomarkers of treatment outcome with bevacizumab: an analysis of data from the AViTA and AVOREN randomised trials.                             | 49 |
| <i>FLT1</i> | rs9582036 | VEGFR1 single nucleotide polymorphisms associated with outcome in patients with metastatic renal cell carcinoma treated with sunitinib - a multicentric retrospective analysis. | 45 |

## References:

1. Reich, D., Thangaraj, K., Patterson, N., Price, A.L., and Singh, L. (2009). Reconstructing Indian population history. *Nature* 461, 489-494.
2. Moorjani, P., Thangaraj, K., Patterson, N., Lipson, M., Loh, P.R., Govindaraj, P., Berger, B., Reich, D., and Singh, L. (2013). Genetic evidence for recent population mixture in India. *Am J Hum Genet* 93, 422-438.
3. Birley, A.J., James, M.R., Dickson, P.A., Montgomery, G.W., Heath, A.C., Martin, N.G., and Whitfield, J.B. (2009). ADH single nucleotide polymorphism associations with alcohol metabolism in vivo. *Human molecular genetics* 18, 1533-1542.
4. Zuo, L., Gelernter, J., Kranzler, H.R., Stein, M.B., Zhang, H., Wei, F., Sen, S., Poling, J., and Luo, X. (2010). ADH1A variation predisposes to personality traits and substance dependence. *Am J Med Genet B Neuropsychiatr Genet* 153B, 376-386.
5. Sherva, R., Rice, J.P., Neuman, R.J., Rochberg, N., Saccone, N.L., and Bierut, L.J. (2009). Associations and interactions between SNPs in the alcohol metabolizing genes and alcoholism phenotypes in European Americans. *Alcohol Clin Exp Res* 33, 848-857.
6. Macgregor, S., Lind, P.A., Bucholz, K.K., Hansell, N.K., Madden, P.A., Richter, M.M., Montgomery, G.W., Martin, N.G., Heath, A.C., and Whitfield, J.B. (2009). Associations of ADH and ALDH2 gene variation with self report alcohol reactions, consumption and dependence: an integrated analysis. *Human molecular genetics* 18, 580-593.
7. Luo, X., Kranzler, H.R., Zuo, L., Wang, S., Schork, N.J., and Gelernter, J. (2006). Diplotype trend regression analysis of the ADH gene cluster and the ALDH2 gene: multiple significant associations with alcohol dependence. *American journal of human genetics* 78, 973-987.
8. Han, Y., Gu, S., Oota, H., Osier, M.V., Pakstis, A.J., Speed, W.C., Kidd, J.R., and Kidd, K.K. (2007). Evidence of positive selection on a class I ADH locus. *American journal of human genetics* 80, 441-456.
9. Luo, X., Kranzler, H.R., Zuo, L., Wang, S., Schork, N.J., and Gelernter, J. (2007). Multiple ADH genes modulate risk for drug dependence in both African- and European-Americans. *Human molecular genetics* 16, 380-390.
10. Peng, Y., Shi, H., Qi, X.B., Xiao, C.J., Zhong, H., Ma, R.L., and Su, B. (2010). The ADH1B Arg47His polymorphism in east Asian populations and expansion of rice domestication in history. *BMC evolutionary biology* 10, 15.
11. Wang, S., Chanock, S., Tang, D., Li, Z., Jedrychowski, W., and Perera, F.P. (2008). Assessment of interactions between PAH exposure and genetic polymorphisms on PAH-DNA adducts in African American, Dominican, and Caucasian mothers and newborns. *Cancer epidemiology, biomarkers & prevention : a publication of the American Association for Cancer Research, cosponsored by the American Society of Preventive Oncology* 17, 405-413.
12. Nock, N.L., Tang, D., Rundle, A., Neslund-Dudas, C., Savera, A.T., Bock, C.H., Monaghan, K.G., Koprowski, A., Mittrache, N., Yang, J.J., et al. (2007). Associations between smoking, polymorphisms in polycyclic aromatic hydrocarbon (PAH) metabolism and conjugation genes and PAH-DNA adducts in prostate tumors differ by race. *Cancer epidemiology, biomarkers & prevention : a publication of the American Association for Cancer Research, cosponsored by the American Society of Preventive Oncology* 16, 1236-1245.
13. Gold, L.S., De Roos, A.J., Brown, E.E., Lan, Q., Milliken, K., Davis, S., Chanock, S.J., Zhang, Y., Severson, R., Zahm, S.H., et al. (2009). Associations of common variants

- in genes involved in metabolism and response to exogenous chemicals with risk of multiple myeloma. *Cancer Epidemiol* 33, 276-280.
14. Sowers, M.R., Wilson, A.L., Kardia, S.R., Chu, J., and McConnell, D.S. (2006). CYP1A1 and CYP1B1 polymorphisms and their association with estradiol and estrogen metabolites in women who are premenopausal and perimenopausal. *Am J Med* 119, S44-51.
  15. Stephenson, N., Beckmann, L., and Chang-Claude, J. (2010). Carcinogen metabolism, cigarette smoking, and breast cancer risk: a Bayes model averaging approach. *Epidemiologic perspectives & innovations : EP+I* 7, 10.
  16. Musak, L., Soucek, P., Vodickova, L., Naccarati, A., Halasova, E., Polakova, V., Slyskova, J., Susova, S., Buchancova, J., Smerhovsky, Z., et al. (2008). Chromosomal aberrations in tire plant workers and interaction with polymorphisms of biotransformation and DNA repair genes. *Mutation research* 641, 36-42.
  17. Pastina, I., Giovannetti, E., Chioni, A., Sissung, T.M., Crea, F., Orlandini, C., Price, D.K., Cianci, C., Figg, W.D., Ricci, S., et al. (2010). Cytochrome 450 1B1 (CYP1B1) polymorphisms associated with response to docetaxel in Castration-Resistant Prostate Cancer (CRPC) patients. *BMC Cancer* 10, 511.
  18. Laroche-Clary, A., Le Morvan, V., Yamori, T., and Robert, J. (2010). Cytochrome P450 1B1 gene polymorphisms as predictors of anticancer drug activity: studies with in vitro models. *Mol Cancer Ther* 9, 3315-3321.
  19. Cotterchio, M., Boucher, B.A., Manno, M., Gallinger, S., Okey, A., and Harper, P. (2006). Dietary phytoestrogen intake is associated with reduced colorectal cancer risk. *J Nutr* 136, 3046-3053.
  20. Zordoky, B.N., and El-Kadi, A.O. (2010). Effect of cytochrome P450 polymorphism on arachidonic acid metabolism and their impact on cardiovascular diseases. *Pharmacol Ther* 125, 446-463.
  21. Cerne, J.Z., Novakovic, S., Frkovic-Grazio, S., Pohar-Perme, M., Stegel, V., and Gersak, K. (2011). Estrogen metabolism genotypes, use of long-term hormone replacement therapy and risk of postmenopausal breast cancer. *Oncol Rep* 26, 479-485.
  22. Kobayashi, S., Sata, F., Sasaki, S., Ban, S., Miyashita, C., Okada, E., Limpar, M., Yoshioka, E., Kajiwara, J., Todaka, T., et al. (2013). Genetic association of aromatic hydrocarbon receptor (AHR) and cytochrome P450, family 1, subfamily A, polypeptide 1 (CYP1A1) polymorphisms with dioxin blood concentrations among pregnant Japanese women. *Toxicol Lett* 219, 269-278.
  23. Wang, H., Yamamoto, J.F., Caberto, C., Saltzman, B., Decker, R., Vogt, T.M., Yokochi, L., Chanock, S., Wilkens, L.R., and Le Marchand, L. (2011). Genetic variation in the bioactivation pathway for polycyclic hydrocarbons and heterocyclic amines in relation to risk of colorectal neoplasia. *Carcinogenesis* 32, 203-209.
  24. Butts, S.F., Freeman, E.W., Sammel, M.D., Queen, K., Lin, H., and Rebbeck, T.R. (2012). Joint effects of smoking and gene variants involved in sex steroid metabolism on hot flashes in late reproductive-age women. *J Clin Endocrinol Metab* 97, E1032-1042.
  25. Cotterchio, M., Boucher, B.A., Manno, M., Gallinger, S., Okey, A.B., and Harper, P.A. (2008). Red meat intake, doneness, polymorphisms in genes that encode carcinogen-metabolizing enzymes, and colorectal cancer risk. *Cancer epidemiology, biomarkers & prevention : a publication of the American Association for Cancer Research, cosponsored by the American Society of Preventive Oncology* 17, 3098-3107.
  26. Chen, B., Hu, Y., Jin, T., Lu, D., Shao, M., Zheng, L., Wang, Q., Shen, Y., Liu, H., Liu, Y., et al. (2007). The influence of metabolic gene polymorphisms on urinary 1-

- hydroxypyrene concentrations in Chinese coke oven workers. *Sci Total Environ* 381, 38-46.
27. Cote, M.L., Yoo, W., Wenzlaff, A.S., Prysak, G.M., Santer, S.K., Claeys, G.B., Van Dyke, A.L., Land, S.J., and Schwartz, A.G. (2009). Tobacco and estrogen metabolic polymorphisms and risk of non-small cell lung cancer in women. *Carcinogenesis* 30, 626-635.
  28. Etemadi, A., Islami, F., Phillips, D.H., Godschalk, R., Golozar, A., Kamangar, F., Malekshah, A.F., Pourshams, A., Elahi, S., Ghajghaj, F., et al. (2013). Variation in PAH-related DNA adduct levels among non-smokers: the role of multiple genetic polymorphisms and nucleotide excision repair phenotype. *Int J Cancer* 132, 2738-2747.
  29. Ovsyannikova, I.G., Haralambieva, I.H., Vierkant, R.A., O'Byrne, M.M., Jacobson, R.M., and Poland, G.A. (2012). Effects of vitamin A and D receptor gene polymorphisms/haplotypes on immune responses to measles vaccine. *Pharmacogenetics and genomics* 22, 20-31.
  30. Maisano Delser, P., and Fuselli, S. (2013). Human loci involved in drug biotransformation: worldwide genetic variation, population structure, and pharmacogenetic implications. *Human genetics* 132, 563-577.
  31. Rodriguez-Antona, C., Sayi, J.G., Gustafsson, L.L., Bertilsson, L., and Ingelman-Sundberg, M. (2005). Phenotype-genotype variability in the human CYP3A locus as assessed by the probe drug quinine and analyses of variant CYP3A4 alleles. *Biochemical and biophysical research communications* 338, 299-305.
  32. Yucesoy, B., Johnson, V.J., Lummus, Z.L., Kissling, G.E., Fluharty, K., Gautrin, D., Malo, J.L., Cartier, A., Boulet, L.P., Sastre, J., et al. (2012). Genetic variants in antioxidant genes are associated with diisocyanate-induced asthma. *Toxicological sciences : an official journal of the Society of Toxicology* 129, 166-173.
  33. Bigos, K.L., Bies, R.R., Pollock, B.G., Lowy, J.J., Zhang, F., and Weinberger, D.R. (2011). Genetic variation in CYP3A43 explains racial difference in olanzapine clearance. *Molecular psychiatry* 16, 620-625.
  34. Broyl, A., Corthals, S.L., Jongen, J.L., van der Holt, B., Kuiper, R., de Knecht, Y., van Duin, M., el Jarari, L., Bertsch, U., Lokhorst, H.M., et al. (2010). Mechanisms of peripheral neuropathy associated with bortezomib and vincristine in patients with newly diagnosed multiple myeloma: a prospective analysis of data from the HOVON-65/GMMG-HD4 trial. *The Lancet Oncology* 11, 1057-1065.
  35. Teichert, M., Eijgelsheim, M., Uitterlinden, A.G., Buhre, P.N., Hofman, A., De Smet, P.A., Visser, L.E., and Stricker, B.H. (2011). Dependency of phenprocoumon dosage on polymorphisms in the VKORC1, CYP2C9, and CYP4F2 genes. *Pharmacogenetics and genomics* 21, 26-34.
  36. Mahon, P.B., Zandi, P.P., Potash, J.B., Nestadt, G., and Wand, G.S. (2013). Genetic association of FKBP5 and CRHR1 with cortisol response to acute psychosocial stress in healthy adults. *Psychopharmacology* 227, 231-241.
  37. Tyrka, A.R., Price, L.H., Gelernter, J., Schepker, C., Anderson, G.M., and Carpenter, L.L. (2009). Interaction of childhood maltreatment with the corticotropin-releasing hormone receptor gene: effects on hypothalamic-pituitary-adrenal axis reactivity. *Biological psychiatry* 66, 681-685.
  38. Ozomaro, U., Wahlestedt, C., and Nemeroff, C.B. (2013). Personalized medicine in psychiatry: problems and promises. *BMC medicine* 11, 132.
  39. Ovsyannikova, I.G., Haralambieva, I.H., Vierkant, R.A., Pankratz, V.S., Jacobson, R.M., and Poland, G.A. (2011). The role of polymorphisms in Toll-like receptors and their

- associated intracellular signaling genes in measles vaccine immunity. *Human genetics* 130, 547-561.
40. Schwab, S.G., Franke, P.E., Hoefgen, B., Guttenthaler, V., Lichtermann, D., Trixler, M., Knapp, M., Maier, W., and Wildenauer, D.B. (2005). Association of DNA polymorphisms in the synaptic vesicular amine transporter gene (SLC18A2) with alcohol and nicotine dependence. *Neuropsychopharmacology : official publication of the American College of Neuropsychopharmacology* 30, 2263-2268.
  41. Kraus, S., Hummler, S., Toriola, A.T., Poole, E.M., Scherer, D., Kotzmann, J., Makar, K.W., Kazanov, D., Galazan, L., Naumov, I., et al. (2013). Impact of genetic polymorphisms on adenoma recurrence and toxicity in a COX2 inhibitor (celecoxib) trial: results from a pilot study. *Pharmacogenetics and genomics* 23, 428-437.
  42. Weiss, R.B., Baker, T.B., Cannon, D.S., von Niederhausern, A., Dunn, D.M., Matsunami, N., Singh, N.A., Baird, L., Coon, H., McMahon, W.M., et al. (2008). A candidate gene approach identifies the CHRNA5-A3-B4 region as a risk factor for age-dependent nicotine addiction. *PLoS genetics* 4, e1000125.
  43. Hoft, N.R., Corley, R.P., McQueen, M.B., Schlaepfer, I.R., Huizinga, D., and Ehringer, M.A. (2009). Genetic association of the CHRNA6 and CHRNB3 genes with tobacco dependence in a nationally representative sample. *Neuropsychopharmacology : official publication of the American College of Neuropsychopharmacology* 34, 698-706.
  44. Hoft, N.R., Corley, R.P., McQueen, M.B., Huizinga, D., Menard, S., and Ehringer, M.A. (2009). SNPs in CHRNA6 and CHRNB3 are associated with alcohol consumption in a nationally representative sample. *Genes, brain, and behavior* 8, 631-637.
  45. Beuselink, B., Karadimou, A., Lambrechts, D., Claes, B., Wolter, P., Couchy, G., Berkers, J., van Poppel, H., Paridaens, R., Schoffski, P., et al. (2014). VEGFR1 single nucleotide polymorphisms associated with outcome in patients with metastatic renal cell carcinoma treated with sunitinib - a multicentric retrospective analysis. *Acta oncologica* 53, 103-112.
  46. Miles, D.W., de Haas, S.L., Dirix, L.Y., Romieu, G., Chan, A., Pivot, X., Tomczak, P., Provencher, L., Cortes, J., Delmar, P.R., et al. (2013). Biomarker results from the AVADO phase 3 trial of first-line bevacizumab plus docetaxel for HER2-negative metastatic breast cancer. *British journal of cancer* 108, 1052-1060.
  47. Schneider, B.P., Shen, F., and Miller, K.D. (2012). Pharmacogenetic biomarkers for the prediction of response to antiangiogenic treatment. *The Lancet Oncology* 13, e427-436.
  48. Clarke, J.M., and Hurwitz, H.I. (2013). Understanding and targeting resistance to anti-angiogenic therapies. *Journal of gastrointestinal oncology* 4, 253-263.
  49. Lambrechts, D., Claes, B., Delmar, P., Reumers, J., Mazzone, M., Yesilyurt, B.T., Devlieger, R., Verslype, C., Tejpar, S., Wildiers, H., et al. (2012). VEGF pathway genetic variants as biomarkers of treatment outcome with bevacizumab: an analysis of data from the AViTA and AVOREN randomised trials. *The Lancet Oncology* 13, 724-733.
